# Supplementary material for: Actinide–Pnictide (An−Pn) Bonds Spanning Non‐Metal, Metalloid, and Metal Combinations (An=U, Th; Pn=P, As, Sb, Bi)
Source: PubMed Central journal article supplement (PMC5814731; doi:10.1002/anie.201711824), 2017-12-29
Supplement: ANIE-57-1332-s001.pdf [file ANIE-57-1332-s001.pdf]

## Supporting Information

### **Actinide–Pnictide (An–Pn) Bonds Spanning Non-Metal, Metalloid, and Metal Combinations (An = U, Th; Pn = P, As, Sb, Bi)**

*Thomas M. Rookes<sup>+</sup>, Elizabeth P. Wildman<sup>+</sup>, Gábor Balázs, Benedict M. Gardner, Ashley J. Wooles, Matthew Gregson, Floriana Tuna, Manfred Scheer,\* and Stephen T. Liddle\**

anie\_201711824\_sm\_miscellaneous\_information.pdf

## Experimental

### General

All manipulations were carried out using Schlenk techniques, or an MBraun UniLab glovebox, under an atmosphere of dry nitrogen. Solvents were dried by passage through activated alumina towers and degassed before use or were distilled from calcium hydride. All solvents were stored over potassium mirrors except ethers which were stored over activated 4 Å sieves. Deuterated solvent was distilled from potassium, degassed by three freeze-pump-thaw cycles and stored under nitrogen.  $[\text{U}(\text{Tren}^{\text{R}})(\text{THF})][\text{BPh}_4]$  ( $\text{Tren}^{\text{R}} = \text{Tren}^{\text{TIPS}}: \{\text{N}(\text{CH}_2\text{CH}_2\text{NSiPr}^i_3)_3\}$  or  $\text{Tren}^{\text{DMBS}}: \{\text{N}(\text{CH}_2\text{CH}_2\text{NSiMe}_2\text{Bu}^t_3)_3\}$ ) and  $[\text{Th}(\text{Tren}^{\text{TIPS}})(\text{DME})][\text{BPh}_4]$  were prepared as described previously.<sup>1-3</sup>  $\text{KPn}(\text{SiMe}_3)_2$  (E = P, As, Sb) were prepared through modification of published procedures.<sup>4-6</sup>

$^1\text{H}$ ,  $^{13}\text{C}$ ,  $^{29}\text{Si}$ , and  $^{31}\text{P}$  NMR spectra were recorded on a Bruker 400 spectrometer operating at 400.2, 100.6, 79.5, and 162.0 MHz respectively; chemical shifts are quoted in ppm and are relative to TMS ( $^1\text{H}$ ,  $^{13}\text{C}$ ,  $^{29}\text{Si}$ ) and 85%  $\text{H}_3\text{PO}_4$  ( $^{31}\text{P}$ ). FTIR spectra were recorded on a Bruker Tensor 27 spectrometer. UV/Vis/NIR spectra were recorded on a Perkin Elmer Lambda 750 spectrometer. Data were collected in 1mm path length cuvettes loaded in an MBraun UniLab glovebox and were run versus the appropriate reference solvent. Static variable-temperature magnetic moment data were recorded in an applied dc field of 0.5 T on a Quantum Design MPMS XL7 superconducting quantum interference device (SQUID) magnetometer using doubly recrystallised powdered samples. Care was taken to ensure complete thermalisation of the sample before each data point was measured and samples were immobilised in an eicosane matrix to prevent sample reorientation during measurements. Diamagnetic corrections were applied for using tabulated Pascal constants and measurements were corrected for the effect of the blank sample holders (flame sealed Wilmad NMR tube and straw) and eicosane matrix. CHN microanalyses were carried out by Mr M Jennings at the University of Manchester and by Tong Liu at the University of Nottingham.

### ***Preparation of $\text{KBi}(\text{SiMe}_3)_2$***

To a solution of  $\text{Bi}(\text{SiMe}_3)_3$  (18.0 g, 42.00 mmol) in THF (10 ml),  $\text{KOBU}^1$  (4.80 g, 42.0 mmol) was added at  $-65\text{ }^\circ\text{C}$  over 20 minutes. The slightly brown solution turned orange as the solution was allowed to reach room temperature. The mixture was stirred for further 4 h, whereupon the solution further turned dark red. After removal of all volatiles under reduced pressure, the resulting solid was washed with *n*-hexane (3  $\times$  30 ml) and was then dried under reduced pressure. Yield: 13.8 g, 81.0%.  $^1\text{H}$  NMR ( $\text{CD}_3\text{CN}$ , 298 K):  $\delta$  0.62 (s,  $\text{Si}(\text{CH}_3)_2$ ).  $^{13}\text{C}\{^1\text{H}\}$  NMR ( $\text{CD}_3\text{CN}$ , 298 K):  $\delta$  12.09 (s,  $J_{\text{SiC}} = 36.3$  Hz,  $\text{Si}(\text{CH}_3)_2$ ).

### ***Preparation of $[\text{Th}(\text{Tren}^{\text{DMBS}})(\text{DME})][\text{BPh}_4]$***

DME (25 ml) was added to a cold ( $-78\text{ }^\circ\text{C}$ ) mixture of  $[\text{Th}(\text{Tren}^{\text{DMBS}})\text{cyclomet}]$  (1.434 g, 2.0 mmol) and  $[\text{HNEt}_3][\text{BPh}_4]$  (0.843 g, 2.0 mmol). The colourless solution was allowed to warm to room temperature whilst stirring for 30 minutes, and stirred for a further 3 hours. Volatiles were removed *in vacuo* to give a white solid. The product was washed with pentane (3  $\times$  5 ml) and dried under vacuum to give a fine white powder. Yield: 1.538 g (68 %). Anal. Calcd for  $\text{C}_{52}\text{H}_{84}\text{BN}_4\text{O}_2\text{Si}_3\text{Th}$ : C, 55.55; H, 7.53; N, 4.98%. Found: C, 55.17; H, 7.80; N, 4.48%.  $^1\text{H}$  NMR ( $\text{C}_6\text{D}_6$ , 298 K):  $\delta$  0.01 (s 18H,  $\text{Si}(\text{CH}_3)_2$ ), 0.89 (s, 27H,  $\text{C}(\text{CH}_3)_3$ ), 2.33 (t,  $^3J_{\text{HH}} = 4.66$  Hz, 6H,  $\text{CH}_2\text{CH}_2$ ), 2.77 (s, 4H,  $\text{CH}_3\text{OCH}_2$ ), 2.84 (s, 6H,  $\text{CH}_3\text{OCH}_2$ ), 3.27 (t,  $^3J_{\text{HH}} = 4.84$  Hz, 6H,  $\text{CH}_2\text{CH}_2$ ) 7.22 (t,  $^3J_{\text{HH}} = 7.09$  Hz, 4H, *p*-Ar-H), 7.39 (t,  $^3J_{\text{HH}} = 7.34$  Hz, 8H, *m*-Ar-H), 8.06 (br, 8H, *o*-Ar-H).  $^{13}\text{C}\{^1\text{H}\}$  NMR ( $\text{C}_6\text{D}_6$ , 298 K):  $\delta$   $-3.85$  ( $\text{Si}(\text{CH}_3)_2$ ), 20.66 ( $\text{C}(\text{CH}_3)_3$ ), 28.20 ( $\text{C}(\text{CH}_3)_3$ ), 47.28 ( $\text{CH}_2\text{CH}_2$ ), 60.95 ( $\text{CH}_3\text{OCH}_2$ ), 62.98 ( $\text{CH}_3\text{OCH}_2$ ), 73.58 ( $\text{CH}_2\text{CH}_2$ ), 122.97 (*p*-Ar-CH), 126.82 (*m*-Ar-CH), 137.50 (*o*-Ar-CH).  $^{29}\text{Si}\{^1\text{H}\}$  NMR ( $\text{C}_6\text{D}_6$ , 298 K):  $\delta$  3.98 ( $\text{Si}(\text{C}(\text{CH}_3)(\text{CH}_3)_2)$ ). FTIR ( $\text{cm}^{-1}$ ): 3055 (w), 2926 (w), 2853 (w), 1580 (w), 1469 (w), 1248 (m), 1084 (m), 1023 (m), 918 (m), 801 (s), 732 (s), 702 (s), 660 (m), 611 (m), 447.21 (m).

### ***Preparation of $[\text{U}(\text{Tren}^{\text{DMBS}})\{\text{P}(\text{SiMe}_3)_2\}]$ (3UP)***

THF (30 ml) was added to a cold ( $-78\text{ }^\circ\text{C}$ ) mixture of  $[\text{U}(\text{Tren}^{\text{DMBS}})(\text{THF})][\text{BPh}_4]$  (3.35 g, 3 mmol) and  $\text{KP}(\text{SiMe}_3)_2$  (0.65 g, 3 mmol). The resulting red solution was allowed to warm to room

temperature and stirred for 30 min. Solvents were removed *in vacuo* and the resulting solid was extracted with pentane (2 x 20 ml) and filtered. Removal of solvents *in vacuo* afforded a red solid. Yield: 2.16 g, 80%. Red crystals suitable for single crystal XRD were obtained from a concentrated pentane solution stored at (−30 °C) for 16 hours. Anal. Calcd. for C<sub>30</sub>H<sub>75</sub>N<sub>4</sub>PSi<sub>5</sub>U·0.36C<sub>5</sub>H<sub>12</sub>: C 40.26; H 8.49; N 6.14%. Found: C 40.26; H 8.44; N 5.78%. <sup>1</sup>H NMR (C<sub>6</sub>D<sub>6</sub>, 295 K): δ −36.74 (s, 6H, CH<sub>2</sub>CH<sub>2</sub>), −13.78 (s, 18H, P{Si(CH<sub>3</sub>)<sub>2</sub>}), 7.92 (s, 6H, CH<sub>2</sub>CH<sub>2</sub>), 9.02 (s, 18H, Si(CH<sub>3</sub>)<sub>2</sub>), 13.04 (s, 27H, C(CH<sub>3</sub>)<sub>3</sub>). <sup>31</sup>P NMR (C<sub>6</sub>D<sub>6</sub>, 298 K): δ 2055.21 (s, P{Si(CH<sub>3</sub>)<sub>2</sub>}). <sup>29</sup>Si{<sup>1</sup>H} NMR (C<sub>6</sub>D<sub>6</sub>, 298 K): δ no resonances observed. μ<sub>eff</sub> (Evans method, C<sub>6</sub>D<sub>6</sub>, 298 K): 2.76 μ<sub>B</sub>. FTIR (cm<sup>−1</sup>): 2950 (s), 2926 (s), 2884 (s), 2851 (s), 1463 (s), 1239 (s), 1061 (s), 930 (s), 822 (w), 799 (s), 770 (w), 656 (w), 623 (w), 474 (w), 433 (w).

#### ***Preparation of [U(Tren<sup>DMBS</sup>){As(SiMe<sub>3</sub>)<sub>2</sub>]} (3UAs)***

THF (30 ml) was added to a cold (−78 °C) mixture of [U(Tren<sup>DMBS</sup>)(THF)][BPh<sub>4</sub>] (3.35 g, 3 mmol) and KAs(SiMe<sub>3</sub>)<sub>2</sub> (0.78 g, 3 mmol). The resulting burgundy solution was allowed to warm to room temperature and stirred for 30 min. Solvents were removed *in vacuo* and the resulting solid was extracted with pentane (2 x 20 ml) and filtered. Removal of solvents *in vacuo* afforded a burgundy solid. Yield: 1.89 g, 67%. Red crystals suitable for single crystal XRD were obtained from a concentrated pentane solution stored at (−30 °C) for 16 hours. Anal. Calcd. for C<sub>30</sub>H<sub>75</sub>N<sub>4</sub>AsSi<sub>5</sub>U: C, 38.12; H, 8.00; N, 5.93%. Found: C 38.06; H 7.97; N 5.58%. <sup>1</sup>H NMR (C<sub>6</sub>D<sub>6</sub>, 295 K): δ −36.06 (s, 6H, CH<sub>2</sub>CH<sub>2</sub>), −12.17 (s, 18H, As{Si(CH<sub>3</sub>)<sub>2</sub>}), 3.42 (b, 6H, CH<sub>2</sub>CH<sub>2</sub>), 10.32 (s, 18H, Si(CH<sub>3</sub>)<sub>2</sub>), 12.63 (s, 27H, C(CH<sub>3</sub>)<sub>3</sub>). <sup>29</sup>Si{<sup>1</sup>H} NMR (C<sub>6</sub>D<sub>6</sub>, 298 K): δ no resonances observed. μ<sub>eff</sub> (Evans method, C<sub>6</sub>D<sub>6</sub>, 298 K): 3.19 μ<sub>B</sub>. FTIR (cm<sup>−1</sup>): 2949 (s), 2925 (s), 2884 (s), 2851 (s), 1463 (s), 1238 (s), 1071 (s), 1060 (s), 930 (s), 906 (w), 890 (s), 821 (s), 798 (s), 770 (w), 771 (w), 675 (s), 657 (w), 618 (w), 588 (w), 565 (s), 526 (w), 446 (w).

#### ***Preparation of [U(Tren<sup>DMBS</sup>){Sb(SiMe<sub>3</sub>)<sub>2</sub>]} (3USb)***

THF (30 ml) was added to a cold (−78 °C) mixture of [U(Tren<sup>DMBS</sup>)(THF)][BPh<sub>4</sub>] (3.35 g, 3 mmol) and KSb(SiMe<sub>3</sub>)<sub>2</sub> (0.92 g, 3 mmol). The resulting dark green solution was allowed to warm to room

temperature and stirred for 30 min. Solvents were removed *in vacuo* and the resulting solid was extracted with pentane (2 x 20 ml) and filtered. Removal of solvents *in vacuo* afforded a dark green solid. Yield: 2.40 g, 81%. Dark green crystals suitable for single crystal XRD were obtained from a concentrated hexane solution stored at (-30 °C) for 15 hours. Anal. Calcd. for C<sub>30</sub>H<sub>75</sub>N<sub>4</sub>SbSi<sub>5</sub>U: C 36.32; H 7.62; N 5.65%. Found: C 36.72; H 7.58; N 5.42%. <sup>1</sup>H NMR (C<sub>6</sub>D<sub>6</sub>, 295 K): δ -36.30 (s, 6H, CH<sub>2</sub>CH<sub>2</sub>), -9.95 (s, 18H, Sb{Si(CH<sub>3</sub>)<sub>2</sub>}), -3.59 (s, 6H, CH<sub>2</sub>CH<sub>2</sub>), 12.41 (s, 27H, C(CH<sub>3</sub>)<sub>3</sub>), 13.00 (s, 18H, Si(CH<sub>3</sub>)<sub>2</sub>). <sup>29</sup>Si{<sup>1</sup>H} NMR (C<sub>6</sub>D<sub>6</sub>, 298 K): δ no resonances observed. μ<sub>eff</sub> (Evan's Method, C<sub>6</sub>D<sub>6</sub>, 298 K): 2.86 μ<sub>B</sub>. FTIR (cm<sup>-1</sup>): 2929 (w), 2926 (w), 2885 (s), 2852 (s), 1463 (s), 1389 (w), 1359 (w), 1347 (w), 1285 (w), 1248 (s), 1235 (s), 1138 (w), 1083 (w), 1071 (s), 940 (w), 923 (s), 902 (w), 798 (s), 770 (w), 697 (w), 677 (s), 615 (w), 590 (w), 565 (w), 529 (w), 448 (w), 409(w).

#### **Preparation of [U(Tren<sup>DMBS</sup>){Bi(SiMe<sub>3</sub>)<sub>2</sub>}] (3UBi)**

THF (30 ml) was added to a cold (-78 °C) mixture of [U(Tren<sup>DMBS</sup>)(THF)][BPh<sub>4</sub>] (3.35 g, 3 mmol) and KBi(SiMe<sub>3</sub>)<sub>2</sub> (1.18 g, 3 mmol). The resulting green solution was allowed to warm to room temperature and stirred for 30 min. Solvents were removed *in vacuo* and the resulting solid was extracted with pentane (2 x 20 ml) and filtered. Removal of solvents *in vacuo* afforded a green crystalline solid. Yield: 1.95 g, 60%. Green crystals were obtained from a concentrated hexane solution stored at (-30 °C) for 15 hours. Anal. Calcd. for C<sub>30</sub>H<sub>75</sub>N<sub>4</sub>BiSi<sub>5</sub>U: C 33.38; H 7.00; N 5.19%. Found: C 32.94; H 6.90; N 4.99%. <sup>1</sup>H NMR (C<sub>6</sub>D<sub>6</sub>, 295 K): δ -36.74 (s, 6H, CH<sub>2</sub>CH<sub>2</sub>), -9.37 (s, 18H, Sb{Si(CH<sub>3</sub>)<sub>2</sub>}), -2.26 (s, 6H, CH<sub>2</sub>CH<sub>2</sub>), 12.63 (s, 27H, C(CH<sub>3</sub>)<sub>3</sub>), 13.27 (s, 18H, Si(CH<sub>3</sub>)<sub>2</sub>). <sup>29</sup>Si{<sup>1</sup>H} NMR (C<sub>6</sub>D<sub>6</sub>, 298 K): δ no resonances observed. μ<sub>eff</sub> (Evan's Method, C<sub>6</sub>D<sub>6</sub>, 298 K): 2.80 μ<sub>B</sub>. FTIR (cm<sup>-1</sup>): 2951 (s), 2926 (s), 2882 (s), 2851 (s), 1463 (s), 1388 (s), 1359 (s), 1347 (s), 1249 (s), 1071 (s), 1056 (s), 1021 (s), 924 (s), 900 (s) 796 (s), 770 (s), 705 (s), 677 (w), 659 (s), 616 (s), 561 (w), 529 (w), 450 (s).

#### **Preparation of [U(Tren<sup>TIPS</sup>){P(SiMe<sub>3</sub>)<sub>3</sub>}] (4UP)**

THF (30 ml) was added to a cold (-78 °C) mixture of [U(Tren<sup>TIPS</sup>)(THF)][BPh<sub>4</sub>] (3.72 g, 3.0 mmol) and KP(SiMe<sub>3</sub>)<sub>2</sub> (0.65 g, 3.0 mmol). The resulting red solution was allowed to warm to room

temperature and stirred for 30 min. Solvents were removed *in vacuo* and the resulting solid was extracted into toluene (2 × 20 ml) and filtered. Removal of solvent *in vacuo* afforded a red solid. Yield: 2.53 g, 81%. Red crystals suitable for single crystal XRD were obtained from a concentrated hexane solution stored at −30 °C for 16 hours. Anal. Calcd. for C<sub>39</sub>H<sub>93</sub>N<sub>4</sub>PSi<sub>5</sub>U·0.2(C<sub>7</sub>H<sub>8</sub>): C 46.39; H 9.12; N 5.36%. Found: C 46.48; H 9.19; N 5.26%. <sup>1</sup>H NMR (C<sub>6</sub>D<sub>6</sub>, 298 K): δ −41.29 (s, 6H, CH<sub>2</sub>CH<sub>2</sub>), −17.25 (s, 18H, P{Si(CH<sub>3</sub>)<sub>2</sub>}), 1.44 (s, 6H, CH<sub>2</sub>CH<sub>2</sub>), 13.41 (9H, s, CH(CH<sub>3</sub>)<sub>3</sub>), 15.50 (s, 54H, CH(CH<sub>3</sub>)<sub>2</sub>). <sup>31</sup>P NMR (C<sub>6</sub>D<sub>6</sub>, 298 K): δ no resonances observed. <sup>29</sup>Si{<sup>1</sup>H} NMR (C<sub>6</sub>D<sub>6</sub>, 298 K): δ −97.09 (SiMe<sub>3</sub>)<sub>2</sub>, 42.96 (Si(CH(CH<sub>3</sub>)<sub>2</sub>)<sub>3</sub>). μ<sub>eff</sub> (Evans method, C<sub>6</sub>D<sub>6</sub>, 298 K): 3.22 μ<sub>B</sub>. FTIR (cm<sup>−1</sup>): 1959 (w), 1463 (s), 1302 (w), 1273 (w), 1239 (s), 1140 (s), 1035 (s), 1010 (s), 930 (s), 902 (w), 881 (s), 828 (s), 806 (w), 726 (s), 671 (s), 656 (s), 627 (s), 568 (s), 518 (s), 465 (s), 431 (s).

#### ***Preparation of [U(Tren<sup>TIPS</sup>){As(SiMe<sub>3</sub>)<sub>2</sub>}] (4UAs)***

THF (30 ml) was added to a cold (−78 °C) mixture of [U(Tren<sup>TIPS</sup>)(THF)][BPh<sub>4</sub>] (3.72 g, 3 mmol) and KAs(SiMe<sub>3</sub>)<sub>2</sub> (0.78 g, 3 mmol). The resulting burgundy solution was allowed to warm to room temperature and stirred for 30 min. Solvents were removed *in vacuo* and the resulting solid was extracted with pentane (2 × 20 ml). The green solution was filtered, solvents were removed *in vacuo* and the resulting solid was recrystallized from HMDSO to obtain an analytically pure sample. Yield: 1.86 g, 58%. Dark red crystals suitable for single crystal XRD were obtained from a concentrated benzene solution stored at 5 °C for 6 hours. Anal. Calc'd. for C<sub>39</sub>H<sub>93</sub>AsN<sub>4</sub>Si<sub>5</sub>U: C 43.71; H 8.75; N 5.23%. Found: C 43.83; H 8.63; N 5.28%. <sup>1</sup>H NMR (C<sub>6</sub>D<sub>6</sub>, 298 K): δ −39.14 (s, 6H, CH<sub>2</sub>CH<sub>2</sub>), −14.23 (s, 18H, As{Si(CH<sub>3</sub>)<sub>2</sub>}), 1.41 (s, 6H, CH<sub>2</sub>CH<sub>2</sub>), 12.45 (9H, s, CH(CH<sub>3</sub>)<sub>2</sub>), 14.33 (s, 54H, CH(CH<sub>3</sub>)<sub>2</sub>). <sup>29</sup>Si{<sup>1</sup>H} NMR (C<sub>6</sub>D<sub>6</sub>, 298 K): δ −61.03 (SiMe<sub>3</sub>)<sub>2</sub>, 38.68 (Si(CH(CH<sub>3</sub>)<sub>2</sub>)<sub>3</sub>). μ<sub>eff</sub> (Evans method, C<sub>6</sub>D<sub>6</sub>, 298 K): 3.27 μ<sub>B</sub>. FTIR (cm<sup>−1</sup>): 2939 (s), 2889 (w), 2862 (s), 1461 (s), 1381 (w), 1362 (w), 1340 (w), 1274 (s), 1236 (s), 1139 (s), 1065 (w), 1051 (s), 1035 (s), 1010 (w), 931 (s), 907 (w), 879 (s), 848 (w), 820 (s), 806 (s), 717 (s), 671 (s), 622 (s), 566 (s), 556 (s), 516 (s).

### **Preparation of [U(Tren<sup>TIPS</sup>){Sb(SiMe<sub>3</sub>)<sub>2</sub>}] (4USb)**

THF (30 ml) was added to a cold (−78 °C) mixture of [U(Tren<sup>TIPS</sup>)(THF)][BPh<sub>4</sub>] (3.72 g, 3 mmol) and KSb(SiMe<sub>3</sub>)<sub>2</sub> (0.92 g, 3 mmol). The resulting dark green solution was allowed to warm to room temperature and stirred for 30 min. Solvents were removed *in vacuo* and the resulting solid was extracted with pentane (2 × 20 ml). The green solution was filtered and solvents were removed *in vacuo* yielding a green solid. Yield: 1.86 g, 62%. Dark green crystals suitable for single crystal XRD were obtained from a concentrated hexane solution stored at −30 °C for 16 hours. Anal. Calc'd. for C<sub>39</sub>H<sub>93</sub>N<sub>4</sub>SbSi<sub>5</sub>U·0.25C<sub>6</sub>H<sub>14</sub>: C 42.67; H 8.53; N 4.91%. Found: C 42.52; H 8.37; N 4.74%. <sup>1</sup>H NMR (C<sub>6</sub>D<sub>6</sub>, 298 K): δ −39.00 (s, 6H, CH<sub>2</sub>CH<sub>2</sub>), −10.20 (s, 18H, Sb{Si(CH<sub>3</sub>)<sub>2</sub>}), 0.95 (s, 6H, CH<sub>2</sub>CH<sub>2</sub>), 11.26 (9H, s, CH(CH<sub>3</sub>)<sub>2</sub>), 13.47 (s, 54H, CH(CH<sub>3</sub>)<sub>2</sub>). <sup>29</sup>Si{<sup>1</sup>H} NMR (C<sub>6</sub>D<sub>6</sub>, 298 K): δ −30.78 (SiMe<sub>3</sub>), 38.17 (Si(CH(CH<sub>3</sub>)<sub>2</sub>)<sub>3</sub>). μ<sub>eff</sub> (Evans method, C<sub>6</sub>D<sub>6</sub>, 298 K): 2.89 μ<sub>B</sub>. FTIR (cm<sup>−1</sup>): 2941 (s), 2888 (w), 2861 (s), 1461 (s), 1382 (w), 1364 (w), 1336 (w), 1272 (s), 1233 (s), 1140 (w), 1032 (w), 1009 (s), 928 (s), 880 (s), 823 (s), 803 (s), 712 (s), 674 (s), 621 (s), 573 (s), 517 (s), 446 (s).

### **Preparation of [Th(Tren<sup>DMBS</sup>){P(SiMe<sub>3</sub>)<sub>2</sub>}] (3ThP)**

DME (25 ml) was added to a cold (−78 °C) mixture of [Th(Tren<sup>DMBS</sup>)(DME)][BPh<sub>4</sub>] (0.769 g, 0.68 mmol) and KP(SiMe<sub>3</sub>)<sub>2</sub> (0.147 g, 0.68 mmol). The pale yellow solution was allowed to warm to room temperature whilst stirring for 30 minutes. Volatiles were removed *in vacuo* and the product was extracted into pentane. Crystalline material was obtained from a toluene (3 ml) solution stored at −30 °C. Yield: 0.532g, 87%. Anal. Calcd for C<sub>30</sub>H<sub>75</sub>N<sub>4</sub>PSi<sub>5</sub>Th: C, 40.24; H, 8.44; N, 6.26%. Found: C, 39.05; H, 8.01; N, 5.85%. <sup>1</sup>H NMR (C<sub>6</sub>D<sub>6</sub>, 298 K): δ 0.49 (s, 18H, Si(CH<sub>3</sub>)<sub>2</sub>), 0.62 (d, <sup>3</sup>J<sub>PH</sub> = 4.16 Hz, 18H, P{Si(CH<sub>3</sub>)<sub>2</sub>}), 1.03 (s, 27H, C(CH<sub>3</sub>)<sub>3</sub>), 2.45 (t, <sup>3</sup>J<sub>HH</sub> = 5.14 Hz, 6H, CH<sub>2</sub>CH<sub>2</sub>), 3.36 (t, <sup>3</sup>J<sub>HH</sub> = 5.01 Hz, 6H, CH<sub>2</sub>CH<sub>2</sub>). <sup>31</sup>P NMR (C<sub>6</sub>D<sub>6</sub>, 298 K): δ −100.09 (s, P(SiMe<sub>3</sub>)<sub>2</sub>). <sup>13</sup>C{<sup>1</sup>H} NMR (C<sub>6</sub>D<sub>6</sub>, 298 K): δ −3.69 (Si(CH<sub>3</sub>)<sub>2</sub>), 7.02 (d, <sup>2</sup>J<sub>CP</sub> = 9.54 Hz, (PSi(CH<sub>3</sub>)<sub>2</sub>), 21.25 (C(CH<sub>3</sub>)<sub>3</sub>), 28.52 (C(CH<sub>3</sub>)<sub>3</sub>), 47.81 (CH<sub>2</sub>CH<sub>2</sub>), 63.25 (CH<sub>2</sub>CH<sub>2</sub>). <sup>29</sup>Si{<sup>1</sup>H} NMR (C<sub>6</sub>D<sub>6</sub>, 298 K): δ no resonances observed. FTIR (cm<sup>−1</sup>): 2949 (m), 2889 (m), 2849 (m), 1469 (w), 1387 (m), 1245 (m), 1074 (m), 924 (s), 895 (s), 797 (s), 783 (s), 769 (s), 709 (s), 657 (m), 560 (m), 454 (m).

### ***Preparation of [Th(Tren<sup>DMBS</sup>){As(SiMe<sub>3</sub>)<sub>2</sub>}] (3ThAs)***

DME (25 ml) was added to a cold (−78 °C) mixture of [Th(Tren<sup>DMBS</sup>)(DME)][BPh<sub>4</sub>] (1.13 g, 1.0 mmol) and KAs(SiMe<sub>3</sub>)<sub>2</sub> (0.26 g, 1.0 mmol). The pale yellow solution was allowed to warm to room temperature whilst stirring for 4 minutes. Volatiles were removed *in vacuo* and the product was extracted into pentane. Crystalline material was obtained from a pentane (3 ml) solution stored at room temperature. Yield: 0.316 g, 34%. Anal. Calcd for C<sub>30</sub>H<sub>75</sub>N<sub>4</sub>AsSi<sub>5</sub>Th: C, 38.36; H, 8.05; N, 5.96%. Found: C, 38.06; H, 8.17; N, 5.82%. <sup>1</sup>H NMR (C<sub>6</sub>D<sub>6</sub>, 298 K): δ 0.50 (s, 18H, Si(CH<sub>3</sub>)<sub>2</sub>), 0.70 (s, 18H, As{Si(CH<sub>3</sub>)<sub>2</sub>}), 1.03 (s, 27H, C(CH<sub>3</sub>)<sub>3</sub>), 2.43 (t, <sup>3</sup>J<sub>HH</sub> = 5.26 Hz, 6H, CH<sub>2</sub>CH<sub>2</sub>), 3.34 (t, <sup>3</sup>J<sub>HH</sub> = 5.31 Hz, 6H, CH<sub>2</sub>CH<sub>2</sub>). <sup>13</sup>C{<sup>1</sup>H} NMR (C<sub>6</sub>D<sub>6</sub>, 298 K): δ −3.70 (Si(CH<sub>3</sub>)<sub>2</sub>), 7.78 (AsSi(CH<sub>3</sub>)<sub>2</sub>), 21.24 (C(CH<sub>3</sub>)<sub>3</sub>), 28.50 (C(CH<sub>3</sub>)<sub>3</sub>), 47.73 (CH<sub>2</sub>CH<sub>2</sub>), 63.76 (CH<sub>2</sub>CH<sub>2</sub>). <sup>29</sup>Si{<sup>1</sup>H} NMR (C<sub>6</sub>D<sub>6</sub>, 298 K): δ −35.55 (Si(CH(CH<sub>3</sub>)<sub>2</sub>)<sub>3</sub>), 8.78 ((SiMe<sub>3</sub>)<sub>2</sub>). FTIR (cm<sup>−1</sup>): 2950 (m), 2925 (m), 2887 (m), 2851 (m), 1246 (m), 1078 (m), 925 (s), 819 (s), 798 (s), 769 (s), 739 (m), 655(m), 617 (m), 545 (w).

### ***Preparation of [Th(Tren<sup>TIPS</sup>){P(SiMe<sub>3</sub>)<sub>2</sub>}] (4ThP)***

DME (25 ml) was added to a cold (−78 °C) mixture of [Th(Tren<sup>TIPS</sup>)(DME)][BPh<sub>4</sub>] (0.493 g, 0.4 mmol) and KP(SiMe<sub>3</sub>)<sub>2</sub> (0.087 g, 0.4 mmol). The pale yellow solution was allowed to warm to room temperature whilst stirring for 30 minutes. Volatiles were removed *in vacuo* and the product was extracted into toluene. Crystalline material was obtained from a toluene (3 ml) solution stored at −30 °C. Yield: 0.122 g (30%). Anal. Calcd for C<sub>39</sub>H<sub>93</sub>N<sub>4</sub>PSi<sub>5</sub>Th•0.15C<sub>7</sub>H<sub>8</sub>: C, 46.46; H, 9.17; N, 5.41%. Found: C, 46.49; H, 9.02; N, 5.44%. <sup>1</sup>H NMR (C<sub>6</sub>D<sub>6</sub>, 298 K): δ 0.59 (d, <sup>3</sup>J<sub>PH</sub> = 4.03 Hz, 18H, Si(CH<sub>3</sub>)<sub>2</sub>), 1.30 (d, <sup>3</sup>J<sub>HH</sub> = 7.09 Hz, 54H, CH(CH<sub>3</sub>)<sub>3</sub>), 1.44 (septet, <sup>3</sup>J<sub>HH</sub> = 7.70, 9H, CH(CH<sub>3</sub>)<sub>3</sub>), 2.50 (t, <sup>3</sup>J<sub>HH</sub> = 4.28 Hz, 6H, CH<sub>2</sub>CH<sub>2</sub>), 3.60 (t, <sup>3</sup>J<sub>HH</sub> = 4.28 Hz, 6H, CH<sub>2</sub>CH<sub>2</sub>). <sup>13</sup>C{<sup>1</sup>H} NMR (C<sub>6</sub>D<sub>6</sub>, 298 K): δ 8.09 (d, <sup>2</sup>J<sub>PC</sub> = 9.53 Hz, Si(CH<sub>3</sub>)<sub>2</sub>), 14.93 (CH(CH<sub>3</sub>)<sub>2</sub>), 20.81 (CH(CH<sub>3</sub>)<sub>2</sub>), 46.14 (CH<sub>2</sub>), 64.95 (CH<sub>2</sub>). <sup>31</sup>P NMR (C<sub>6</sub>D<sub>6</sub>, 298 K): δ −66.45 (s, P(SiMe<sub>3</sub>)<sub>2</sub>). <sup>29</sup>Si{<sup>1</sup>H} NMR (C<sub>6</sub>D<sub>6</sub>, 298 K): δ 5.12 (Si(CH(CH<sub>3</sub>)<sub>2</sub>)<sub>3</sub>), 8.49 ((SiMe<sub>3</sub>)<sub>2</sub>). FTIR (cm<sup>−1</sup>): 2940 (m), 2888 (m), 2862 (m), 1460 (m), 1381 (w), 1237 (m), 1137 (w), 1039 (m), 987 (m), 929 (s), 880 (s), 825 (s), 728 (s) 671 (s), 624 (s), 562 (m), 516 (m), 432 (m).



**Preparation of [Th(Tren<sup>TIPS</sup>){As(SiMe<sub>3</sub>)<sub>2</sub>}] (4ThAs)**

DME (25 ml) was added to a cold (−78 °C) mixture of [Th(Tren<sup>TIPS</sup>)(DME)][BPh<sub>4</sub>] (1.23 g, 1.0 mmol) and KAs(SiMe<sub>3</sub>)<sub>2</sub> (0.260 g, 1.0 mmol). The pale yellow solution was allowed to warm to room temperature whilst stirring for 30 minutes. Volatiles were removed *in vacuo* and the product was extracted into pentane. Crystalline material was obtained from a pentane (3 ml) solution stored at −30 °C. Yield: 0.204 g (19%). Anal. Calcd for C<sub>39</sub>H<sub>93</sub>AsN<sub>4</sub>Si<sub>5</sub>Th: C, 43.96; H, 8.80; N, 5.26%. Found: C, 44.37; H, 8.58; N, 5.52%. <sup>1</sup>H NMR (C<sub>6</sub>D<sub>6</sub>, 298 K): δ 0.68 (s, 18H, Si(CH<sub>3</sub>)<sub>2</sub>), 1.30 (d, <sup>3</sup>J<sub>HH</sub> = 7.21 Hz, 54H, CH(CH<sub>3</sub>)<sub>3</sub>), 1.45 (septet, <sup>3</sup>J<sub>HH</sub> = 7.04 Hz, 9H, CH(CH<sub>3</sub>)<sub>3</sub>), 2.51 (t, br, 6H, CH<sub>2</sub>CH<sub>2</sub>), 3.61 (t, br, 6H, CH<sub>2</sub>CH<sub>2</sub>). <sup>13</sup>C{<sup>1</sup>H} NMR (C<sub>6</sub>D<sub>6</sub>, 298 K): δ 8.80 (Si(CH<sub>3</sub>)<sub>2</sub>), 14.81 (CH(CH<sub>3</sub>)<sub>2</sub>), 20.79 (CH(CH<sub>3</sub>)<sub>2</sub>), 46.28 (CH<sub>2</sub>), 65.08 (CH<sub>2</sub>). <sup>29</sup>Si{<sup>1</sup>H} NMR (C<sub>6</sub>D<sub>6</sub>, 298 K): δ 5.20 (Si(CH(CH<sub>3</sub>)<sub>2</sub>)<sub>3</sub>), 11.46 ((SiMe<sub>3</sub>)<sub>2</sub>). FTIR (cm<sup>−1</sup>): 2939 (m), 2889 (m), 2861 (m), 1462 (w), 1382 (m), 1237 (m), 1041 (m), 1010 (m) 929 (s), 880 (s), 810 (s), 730 (s) 672 (s), 625 (s), 564 (m), 516 (m), 446 (m).

**Preparation of [Th(Tren<sup>TIPS</sup>){Sb(SiMe<sub>3</sub>)<sub>2</sub>}] (4ThSb)**

DME (25 ml) was added to a cold (−78 °C) mixture of [Th(Tren<sup>TIPS</sup>)(DME)][BPh<sub>4</sub>] (0.911 g, 0.73 mmol) and KSb(SiMe<sub>3</sub>)<sub>2</sub> (0.223 g, 0.73 mmol) to give a brown solution. Volatiles were immediately removed *in vacuo* and the product was extracted into pentane (10 ml), giving a dark orange solution. Crystalline material was obtained from a pentane (3 ml) solution stored at −30 °C. Yield: 0.112 g (14%). Anal. Calcd for C<sub>39</sub>H<sub>93</sub>N<sub>4</sub>SbSi<sub>5</sub>Th: C, 42.11; H, 8.43; N, 5.04%. Found: C, 41.87; H, 8.60; N, 5.15%. <sup>1</sup>H NMR (C<sub>6</sub>D<sub>6</sub>, 298 K): δ 0.82 (s, 18H, Si(CH<sub>3</sub>)<sub>2</sub>), 1.30 (d, <sup>3</sup>J<sub>HH</sub> = 7.34 Hz, 54H, CH(CH<sub>3</sub>)<sub>3</sub>), 1.45 (septet, <sup>3</sup>J<sub>HH</sub> = 7.43 Hz, 9H, CH(CH<sub>3</sub>)<sub>3</sub>), 2.51 (t, <sup>3</sup>J<sub>HH</sub> = 4.27 Hz, 6H, CH<sub>2</sub>CH<sub>2</sub>), 3.59 (t, <sup>3</sup>J<sub>HH</sub> = 4.48 Hz, 6H, CH<sub>2</sub>CH<sub>2</sub>). <sup>13</sup>C{<sup>1</sup>H} NMR (C<sub>6</sub>D<sub>6</sub>, 298 K): δ 10.10 (Si(CH<sub>3</sub>)<sub>2</sub>), 14.51 (CH(CH<sub>3</sub>)<sub>2</sub>), 20.76 (CH(CH<sub>3</sub>)<sub>2</sub>), 46.52 (CH<sub>2</sub>), 64.66 (CH<sub>2</sub>). <sup>29</sup>Si{<sup>1</sup>H} NMR (C<sub>6</sub>D<sub>6</sub>, 298 K): δ 5.38 (Si(CH(CH<sub>3</sub>)<sub>2</sub>)<sub>3</sub>). (Sb(SiMe<sub>3</sub>)<sub>2</sub>) resonance not observed. FTIR (cm<sup>−1</sup>): 2940 (m), 2887 (m), 2861 (m), 1461 (w), 1381 (w), 1233 (m), 1039 (m), 1011 (m) 927 (s), 880 (s), 808 (s), 727 (s) 673 (s), 630 (s), 570 (m), 516 (m), 446 (m).

## Magnetism

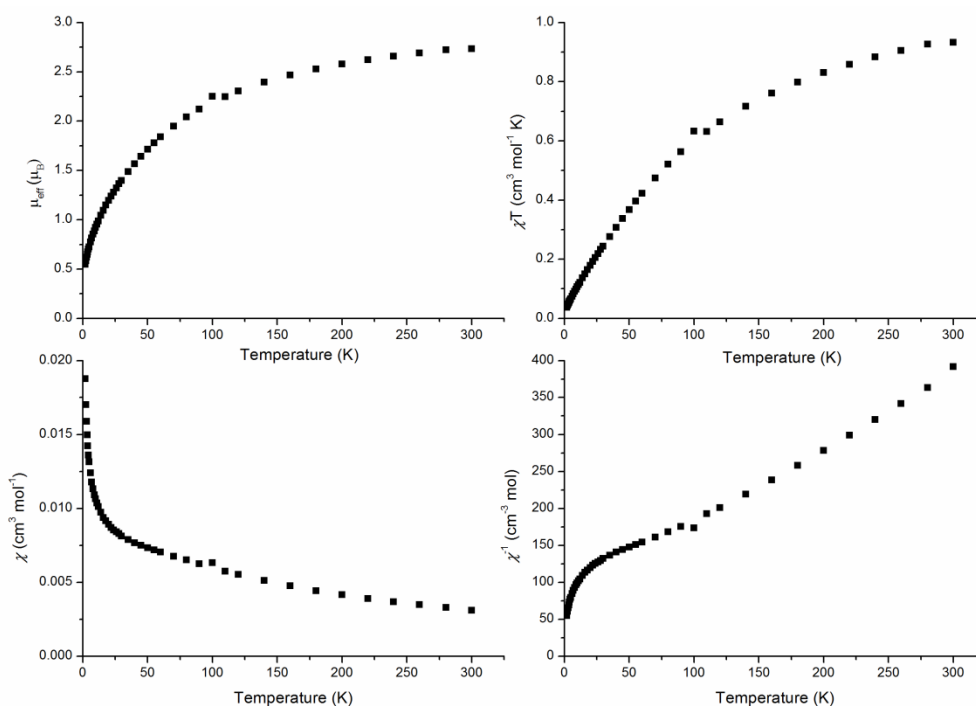

**Figure S1.** Variable Temperature SQUID Data for  $\mu_{\text{eff}}$  vs T (top left,  $\mu_{\text{eff}} = 2.73$  (298 K) and 0.55 (2 K  $\mu_{\text{B}}$ ),  $\chi T$  vs T (top right),  $\chi$  vs T (bottom left), and  $1/\chi$  vs T (bottom right) for **3UP**.

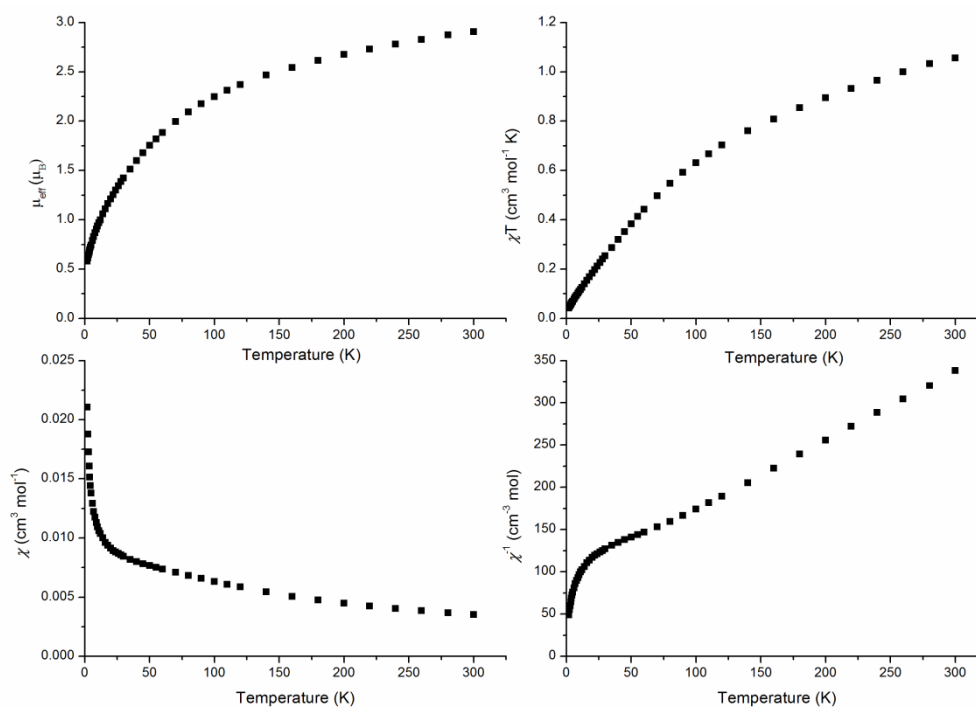

**Figure S2.** Variable Temperature SQUID Data for  $\mu_{\text{eff}}$  vs T (top left,  $\mu_{\text{eff}} = 2.91$  (298 K) and 0.58 (2 K  $\mu_{\text{B}}$ ),  $\chi T$  vs T (top right),  $\chi$  vs T (bottom left), and  $1/\chi$  vs T (bottom right) for **3UAs**.

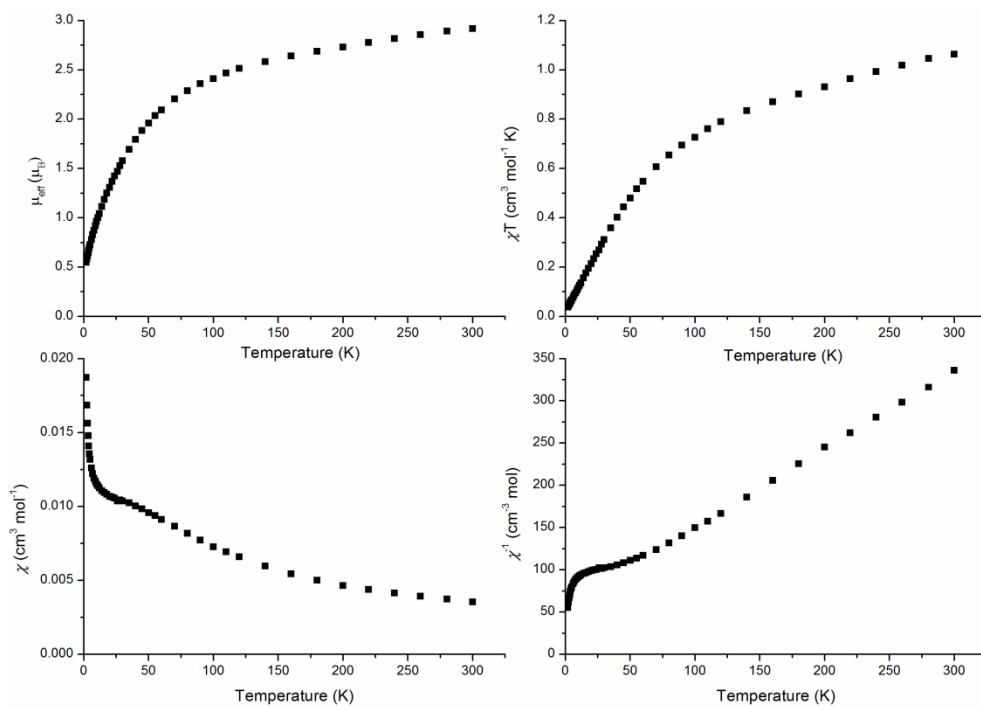

**Figure S3.** Variable Temperature SQUID Data for  $\mu_{\text{eff}}$  vs T (top left,  $\mu_{\text{eff}} = 2.92$  (298 K) and 0.55 (2 K  $\mu_{\text{B}}$ ),  $\chi T$  vs T (top right),  $\chi$  vs T (bottom left), and  $1/\chi$  vs T (bottom right) for **3USb**.

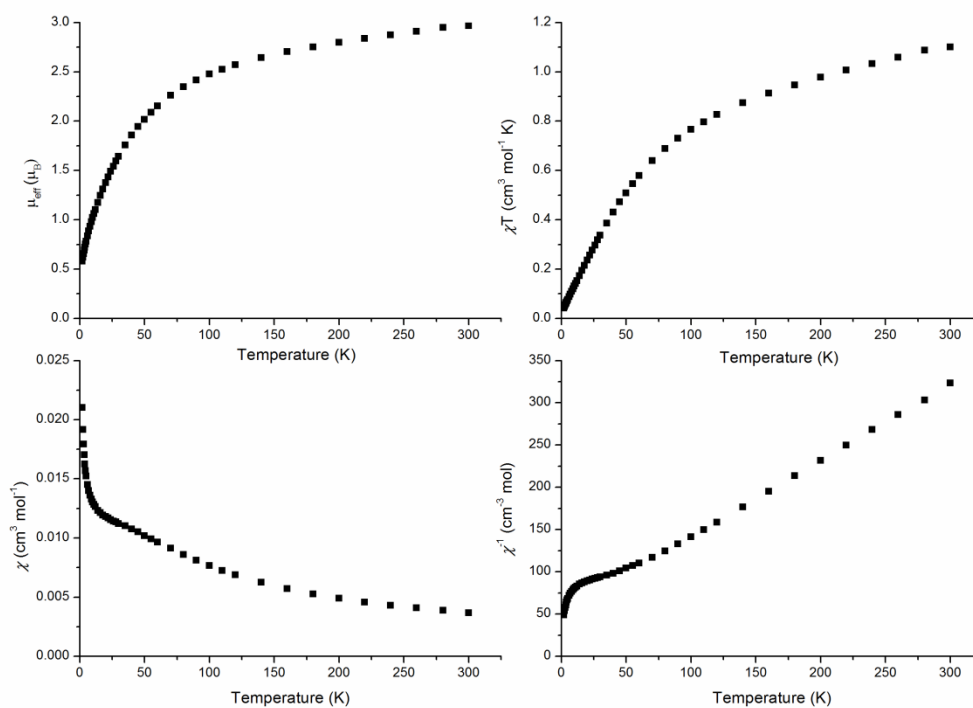

**Figure S4.** Variable Temperature SQUID Data for  $\mu_{\text{eff}}$  vs T (top left,  $\mu_{\text{eff}} = 2.97$  (298 K) and 0.58 (2 K  $\mu_{\text{B}}$ ),  $\chi T$  vs T (top right),  $\chi$  vs T (bottom left), and  $1/\chi$  vs T (bottom right) for **3UBi**.

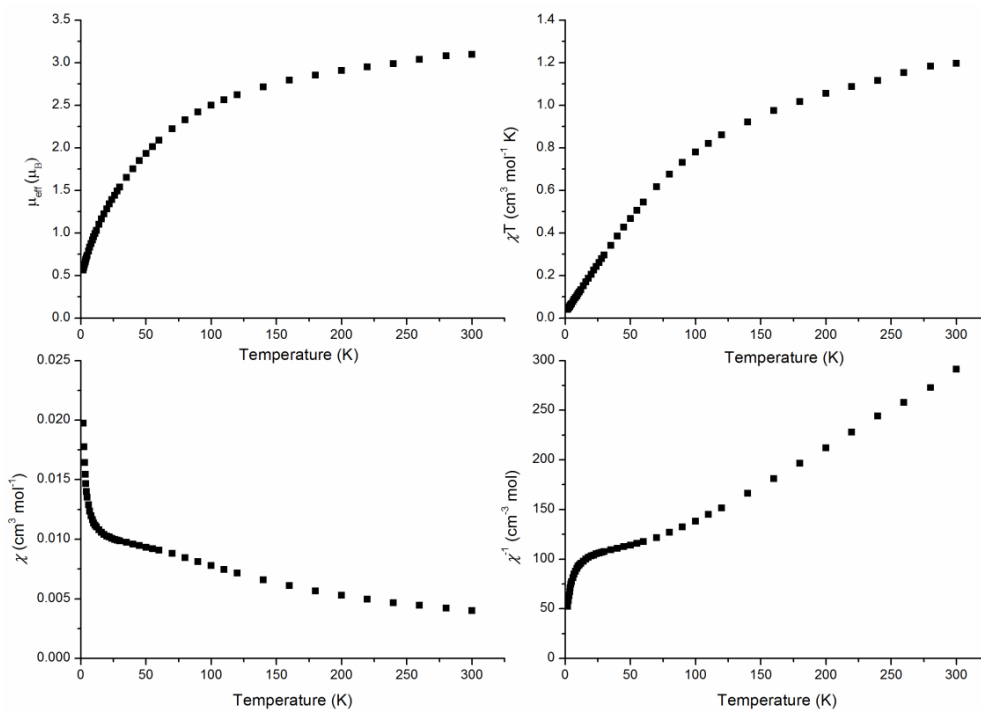

**Figure S5.** Variable Temperature SQUID Data for  $\mu_{\text{eff}}$  vs T (top left,  $\mu_{\text{eff}} = 3.09$  (298 K) and 0.56 (2 K  $\mu_{\text{B}}$ ),  $\chi T$  vs T (top right),  $\chi$  vs T (bottom left), and  $1/\chi$  vs T (bottom right) for **4UP**.

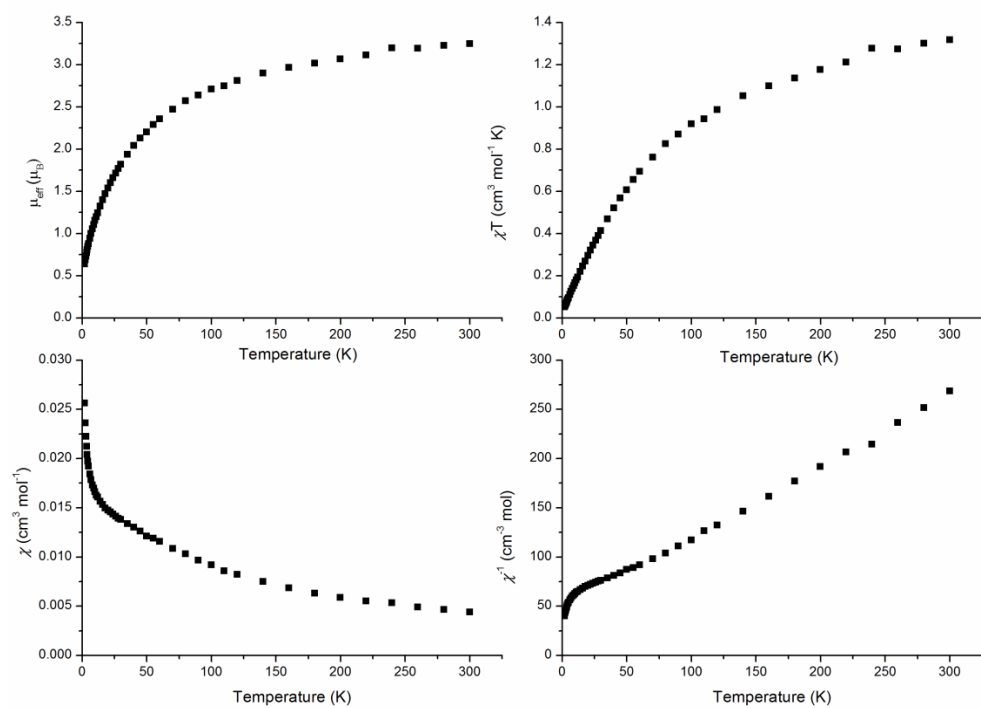

**Figure S6.** Variable Temperature SQUID Data for  $\mu_{\text{eff}}$  vs T (top left,  $\mu_{\text{eff}} = 3.25$  (298 K) and 0.64 (2 K  $\mu_{\text{B}}$ ),  $\chi T$  vs T (top right),  $\chi$  vs T (bottom left), and  $1/\chi$  vs T (bottom right) for **4UAs**.

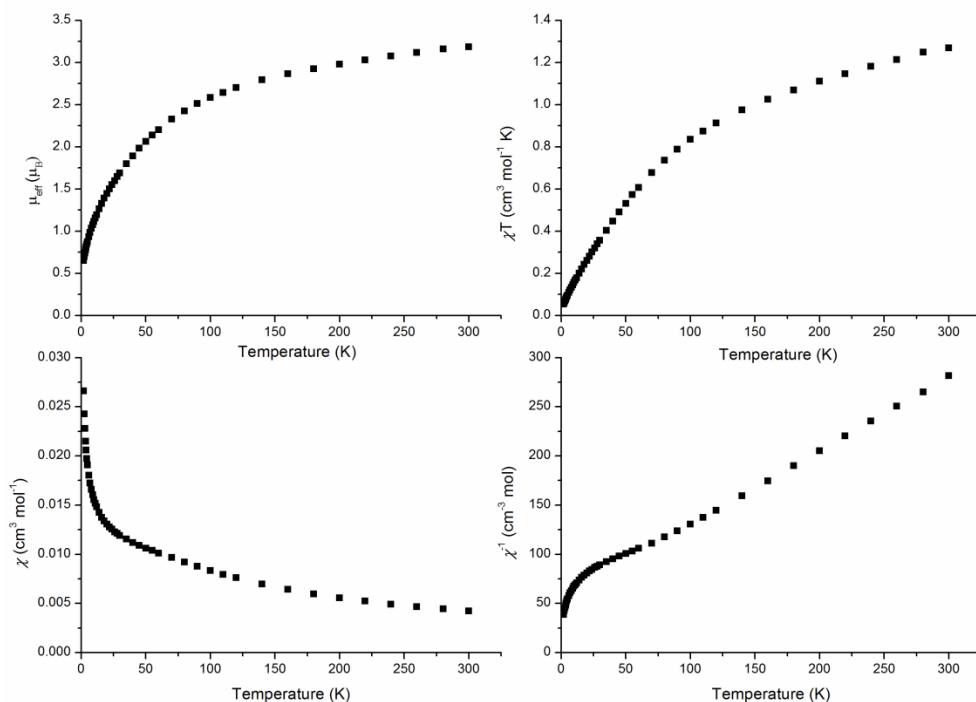

**Figure S7.** Variable Temperature SQUID Data for  $\mu_{\text{eff}}$  vs T (top left,  $\mu_{\text{eff}} = 2.86$  (298 K) and 0.65 (2 K  $\mu_{\text{B}}$ ),  $\chi T$  vs T (top right),  $\chi$  vs T (bottom left), and  $1/\chi$  vs T (bottom right) for **4USb**.

### UV/Vis/NIR Electronic Absorption Spectrum

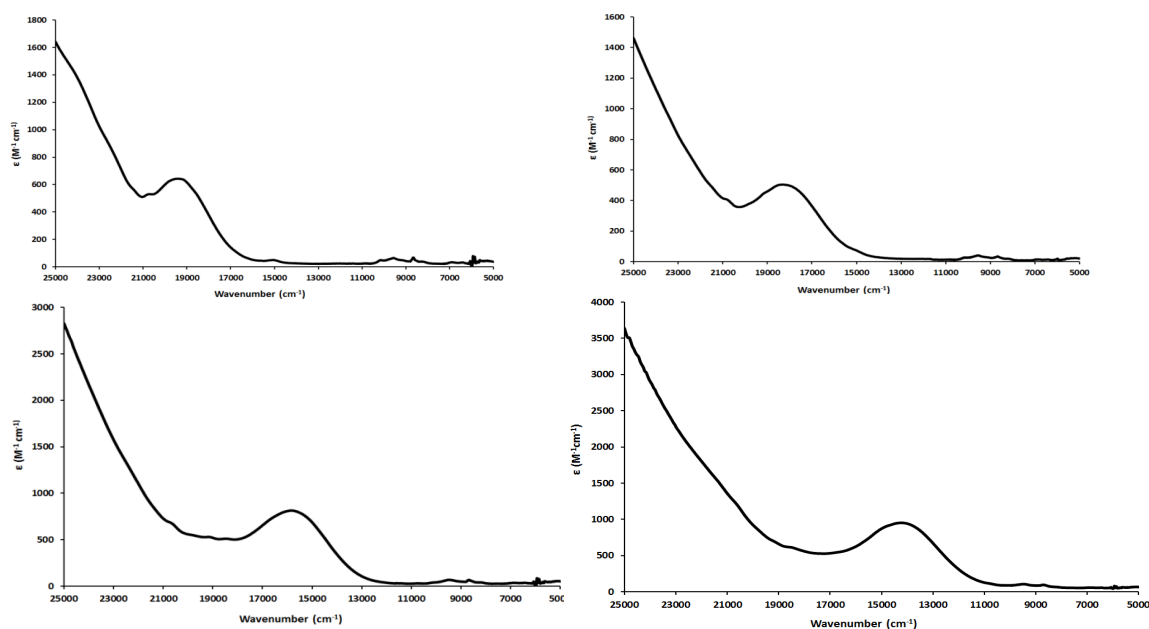

**Figure S8.** UV/VIS/NIR electronic absorption spectra of **3UP** (top left), **3UAs** (top right), **3USb** (bottom left), and **3UBi** (bottom right), 10mM in Toluene in 1mm cell.

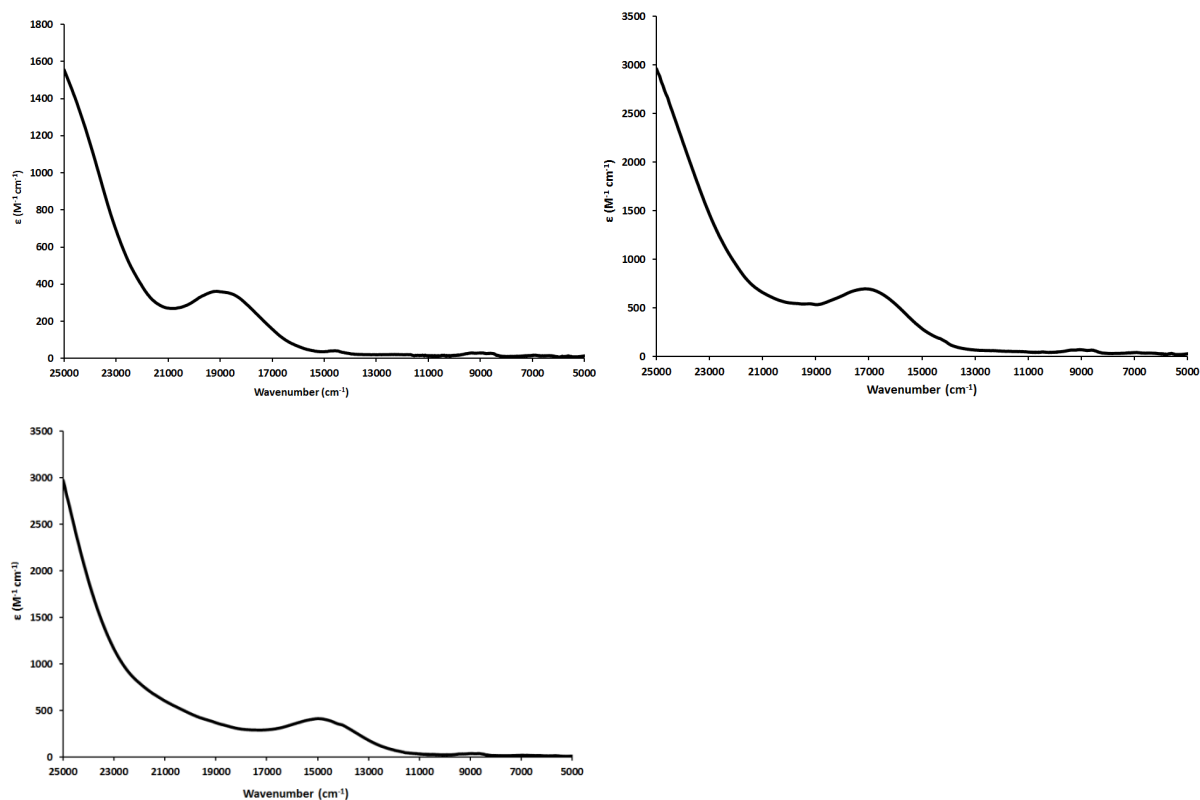

**Figure S9.** UV/VIS/NIR electronic absorption spectra of **4UP** (top left), **4UAs** (top right), and **4USb** (bottom left), 10mM in Toluene in 1mm cell.

### X-ray Crystallography (CCDC 1585332-1585346)

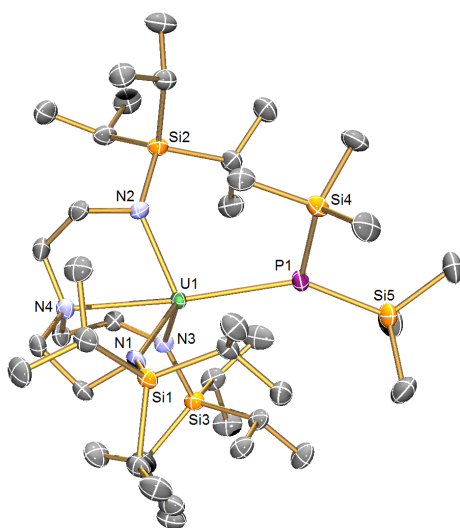

**Figure S10.** Solid state structure of **4UP** at 150 K and displacement ellipsoids set to 40% and hydrogen atoms, minor disorder components, and any lattice solvent omitted for clarity.

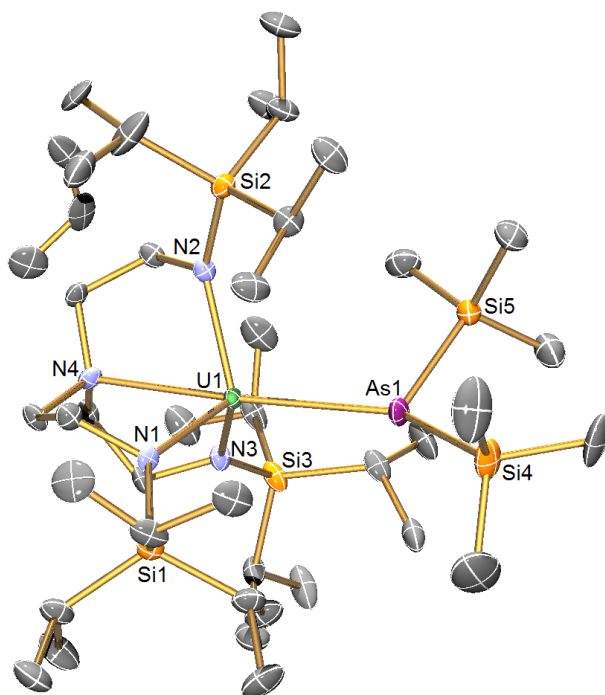

**Figure S11.** Solid state structure of **4UAs** at 150 K and displacement ellipsoids set to 40% and hydrogen atoms, minor disorder components, and any lattice solvent omitted for clarity.

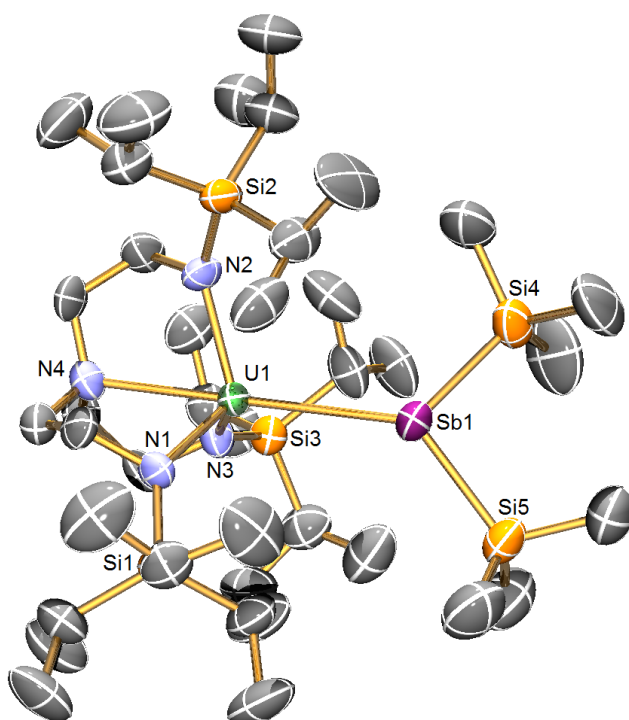

**Figure S12.** Solid state structure of **4USb** at 120 K and displacement ellipsoids set to 40% and hydrogen atoms, minor disorder components, and any lattice solvent omitted for clarity.

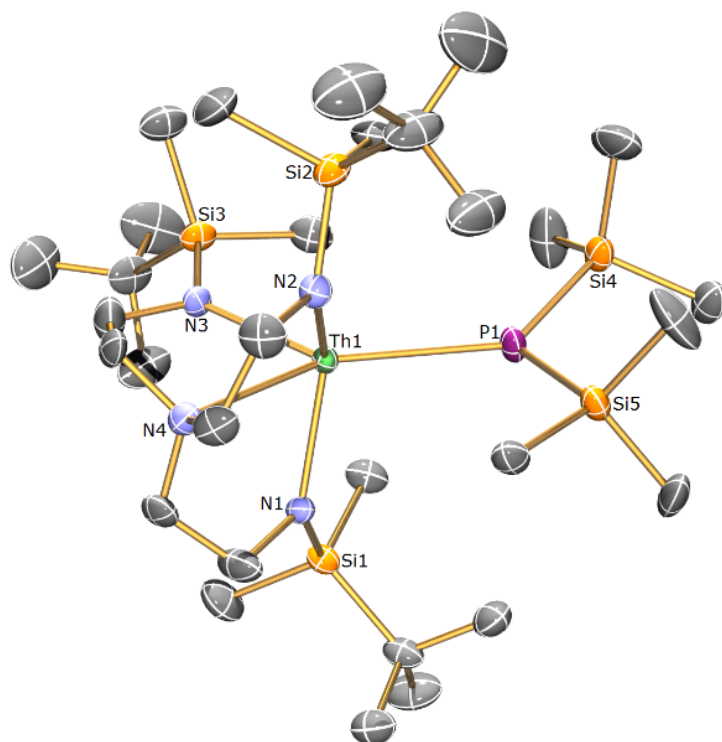

**Figure S13.** Solid state structure of **3ThP** at 150 K and displacement ellipsoids set to 40% and hydrogen atoms, minor disorder components, and any lattice solvent omitted for clarity.

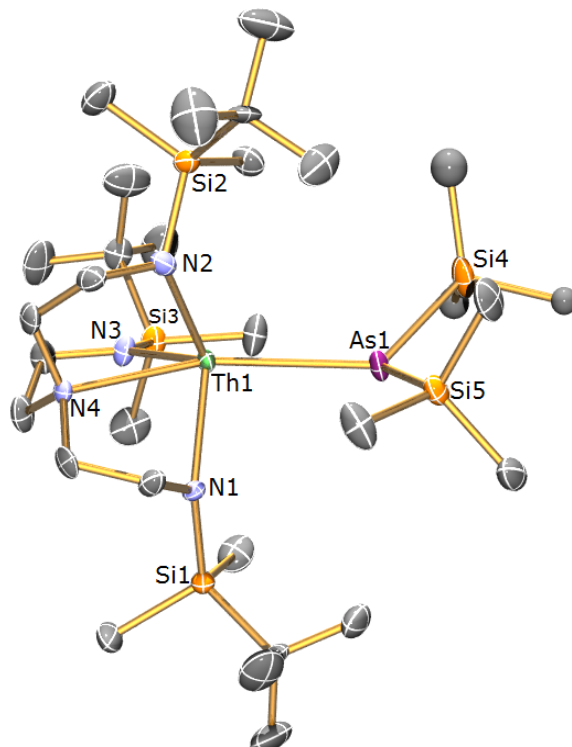

**Figure S14.** Solid state structure of **3ThAs** at 150 K and displacement ellipsoids set to 40% and hydrogen atoms, minor disorder components, and any lattice solvent omitted for clarity.



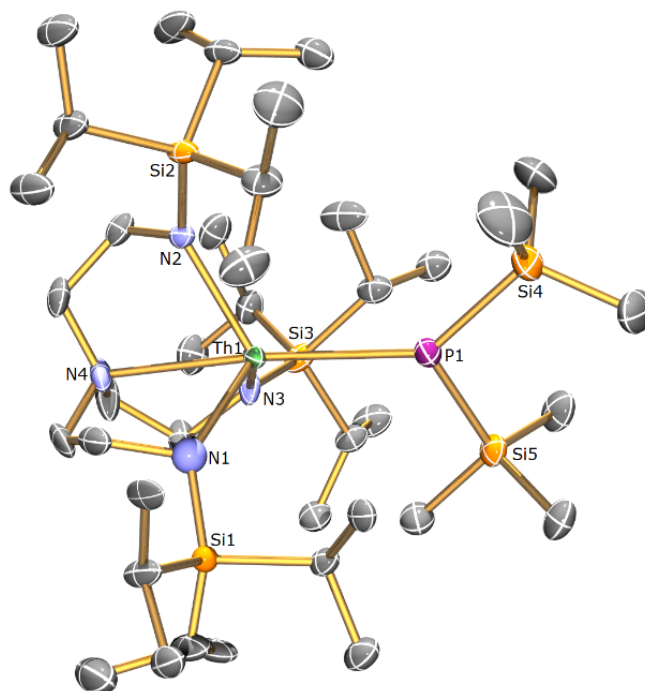

**Figure S15.** Solid state structure of **4ThP** at 150 K and displacement ellipsoids set to 40% and hydrogen atoms, minor disorder components, and any lattice solvent omitted for clarity.

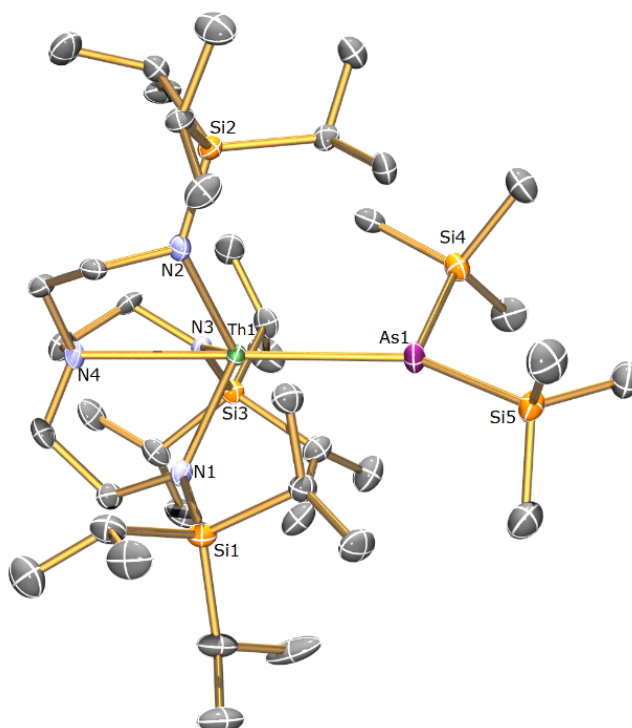

**Figure S16.** Solid state structure of **4ThAs** at 150 K and displacement ellipsoids set to 40% and hydrogen atoms, minor disorder components, and any lattice solvent omitted for clarity.

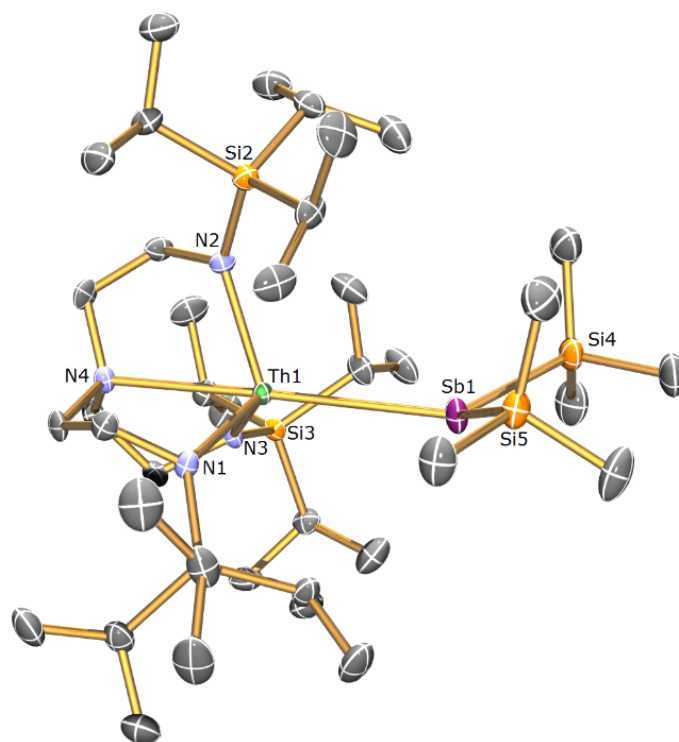

**Figure S17.** Solid state structure of **4ThSb** at 150 K and displacement ellipsoids set to 40% and hydrogen atoms, minor disorder components, and any lattice solvent omitted for clarity.

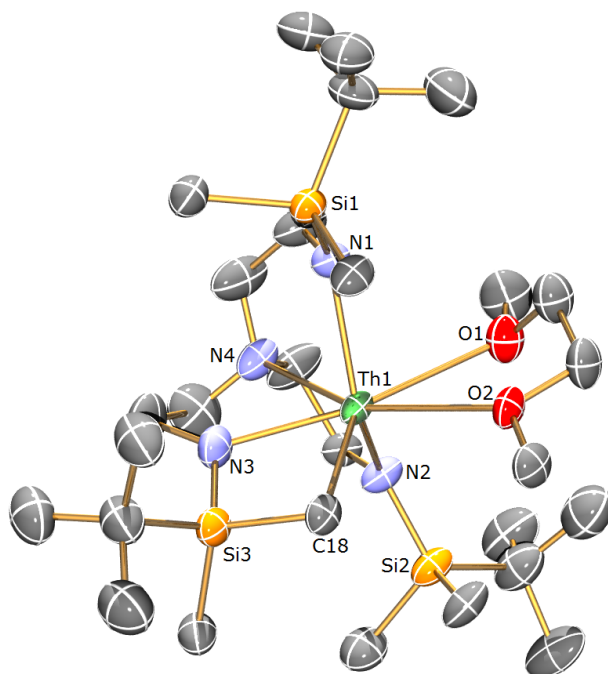

**Figure S18.** Solid state structure of **5** at 150 K and displacement ellipsoids set to 40% and hydrogen atoms, minor disorder components, and any lattice solvent omitted for clarity.

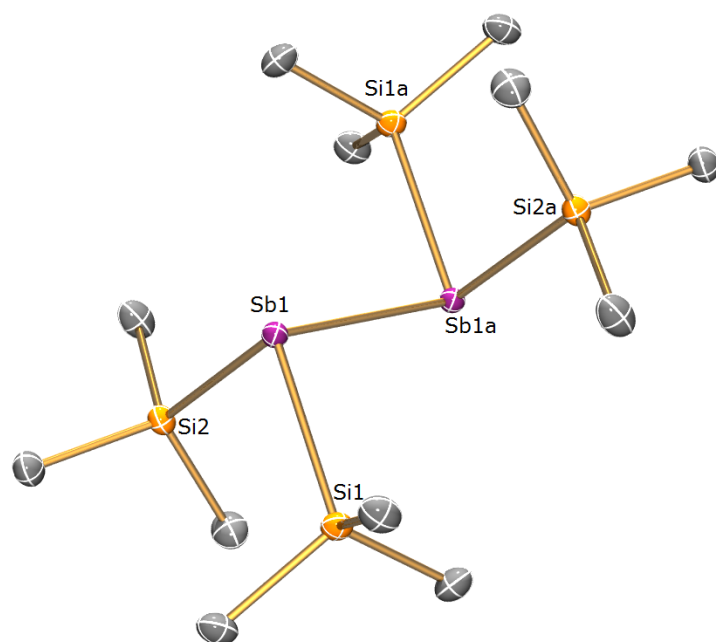

**Figure S19.** Solid state structure of **Sb<sub>2</sub>** at 150 K and displacement ellipsoids set to 40% and hydrogen atoms, minor disorder components, and any lattice solvent omitted for clarity.

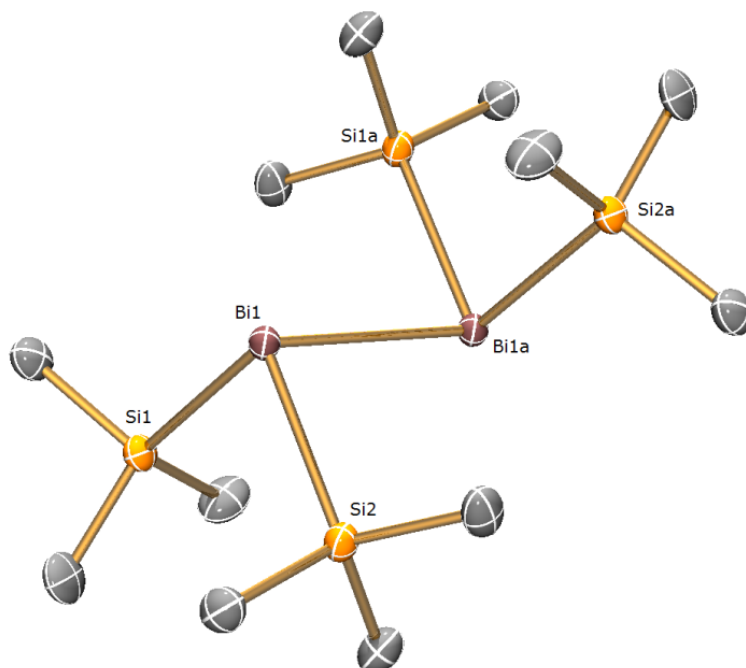

**Figure S20.** Solid state structure of **Bi<sub>2</sub>** at 150 K and displacement ellipsoids set to 40% and hydrogen atoms, minor disorder components, and any lattice solvent omitted for clarity.

## Computational Details

### General

Unrestricted (uranium) and restricted (thorium) geometry optimisations were performed for the full models of **3UP**, **3UAs**, **3USb**, **3UBi**, **3ThP**, **3ThAs**, **4UP**, **4UAs**, **4USb**, **4ThP**, **4ThAs**, and **4ThSb** using coordinates derived from the X-ray crystal structures. No constraints were imposed on the calculations. The calculations were performed using the Amsterdam Density Functional (ADF) suite version 2012.01.<sup>7,8</sup> The DFT geometry optimisations employed Slater type orbital (STO) triple- $\zeta$ -plus polarisation all-electron basis sets (from the ZORA/TZP database of the ADF suite). Scalar relativistic approaches were used within the ZORA Hamiltonian for the inclusion of relativistic effects and the local density approximation (LDA) with the correlation potential due to Vosko et al<sup>9</sup> was used in all of the calculations. Gradient corrections were performed using the functionals of Becke<sup>10</sup> and Perdew.<sup>11</sup> MOLEKEL<sup>12</sup> was used to prepare the three-dimensional plot of the electron density. Natural Bond Order (NBO) analyses were carried out with NBO 5.0.<sup>13</sup> The Atoms in Molecules analysis<sup>14,15</sup> was carried out with Xaim-1.0.<sup>16</sup>

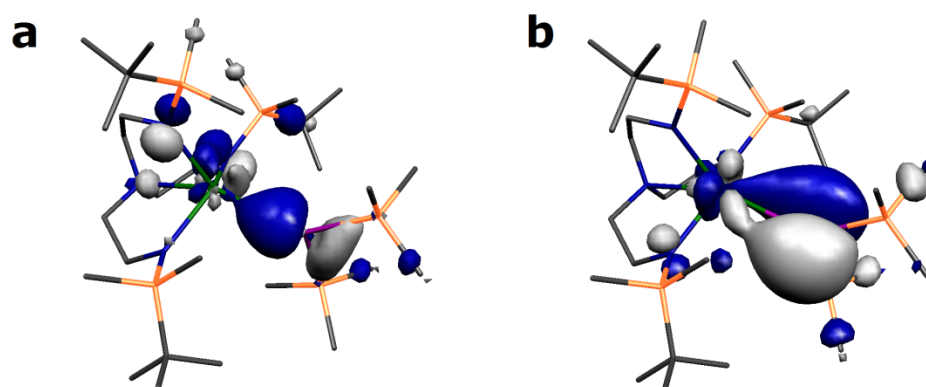

**Figure S21.** Kohn-Sham molecular orbital representations of the principal U-P interactions of **3UP**. HOMO-6 (a, -5.480 eV) and HOMO-2 (b, -3.964 eV).

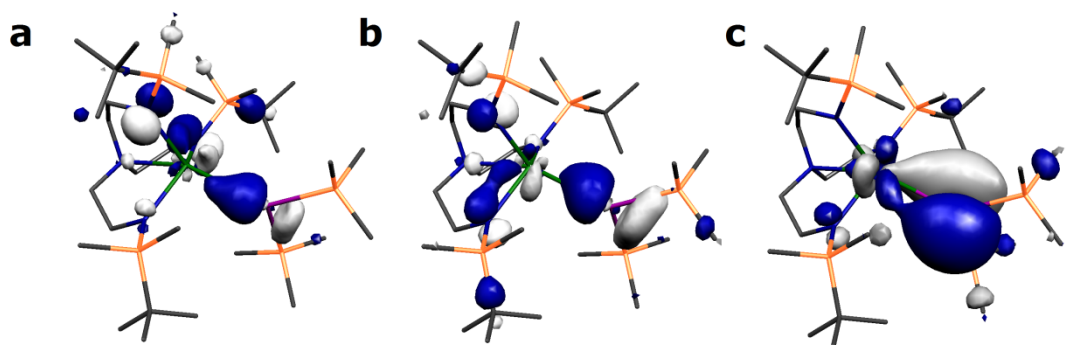

**Figure S22.** Kohn-Sham molecular orbital representations of the principal U-As interactions of **3UAs**. HOMO-6 (a, -5.425 eV), HOMO-5 (b, -5.254 eV) and HOMO-2 (c, -3.768 eV).

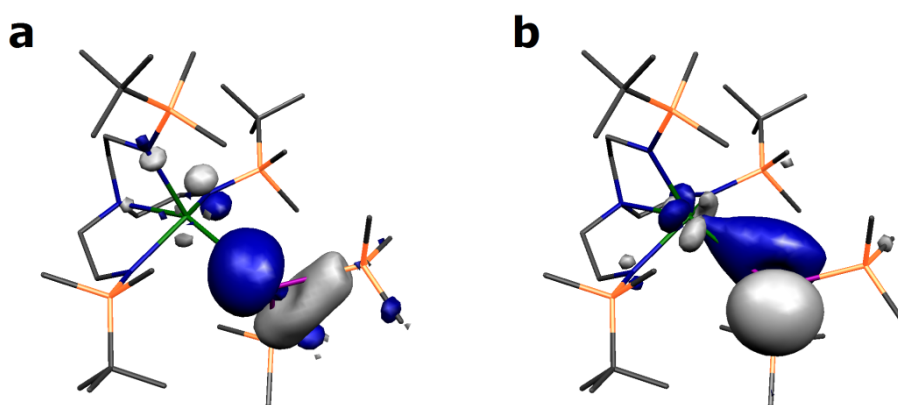

**Figure S23.** Kohn-Sham molecular orbital representations of the principal U-Sb interactions of **3USb**. HOMO-3 (a, -4.854 eV) and HOMO-2 (b, -3.624 eV).

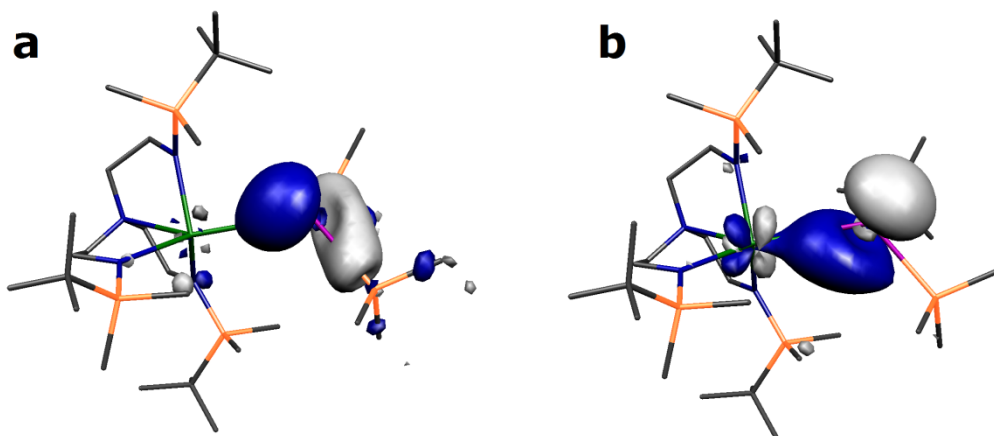

**Figure S24.** Kohn-Sham molecular orbital representations of the principal U-Bi interactions of **3UBi**. HOMO-3 (a, -4.732 eV) and HOMO-2 (b, -3.561 eV).

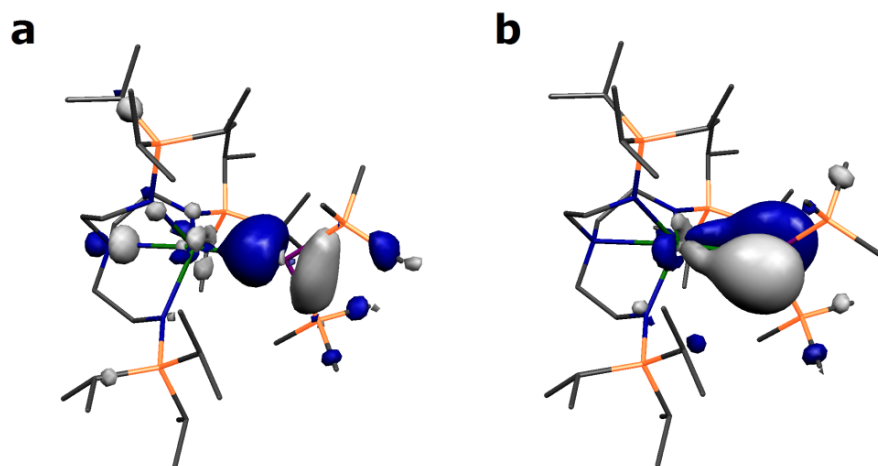

**Figure S25.** Kohn-Sham molecular orbital representations of the principal U-P interactions of 4UP. HOMO-6 (a, -5.545 eV) and HOMO-2 (b, -4.121 eV).

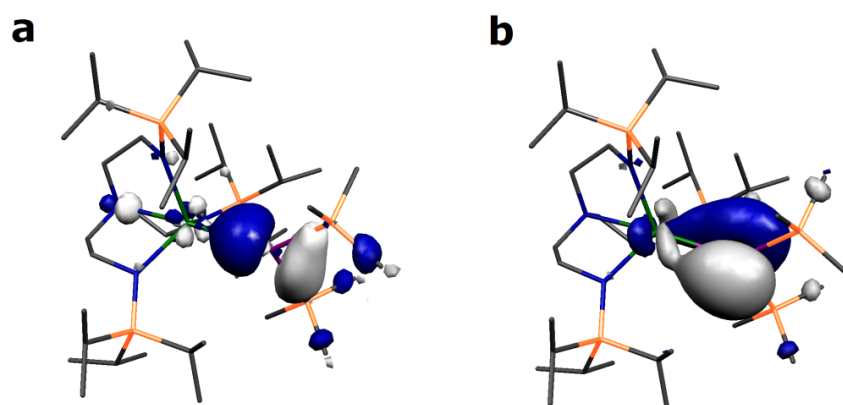

**Figure S26.** Kohn-Sham molecular orbital representations of the principal U-As interactions of 4UAs. HOMO-6 (a, -5.510 eV) and HOMO-2 (b, -3.881 eV).

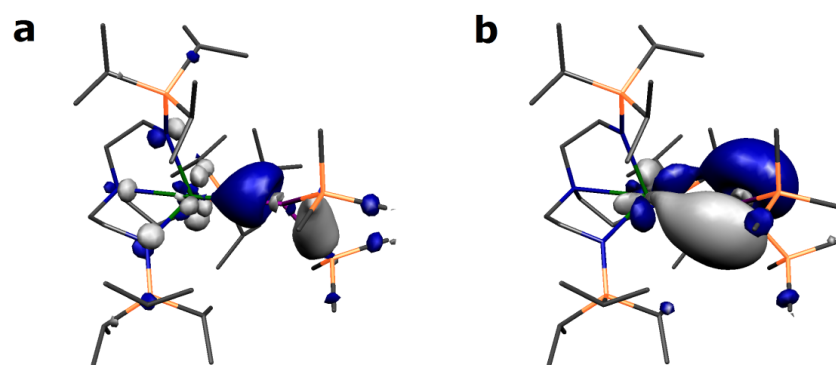

**Figure S27.** Kohn-Sham molecular orbital representations of the principal U-Sb interactions of 4USb. HOMO-6 (a, -5.342 eV) and HOMO-2 (b, -3.682 eV).

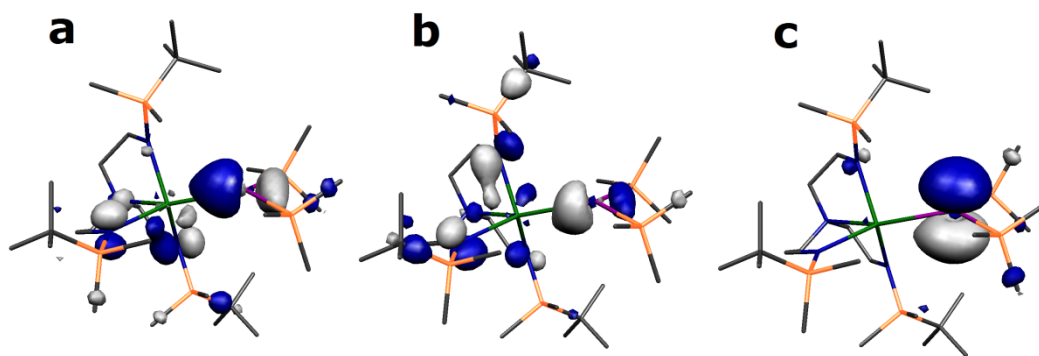

**Figure S28.** Kohn-Sham molecular orbital representations of the principal Th-P interactions of **3ThP**. HOMO-4 (a, -5.441 eV), HOMO-3 (b, -5.258 eV) and HOMO (c, -3.927 eV).

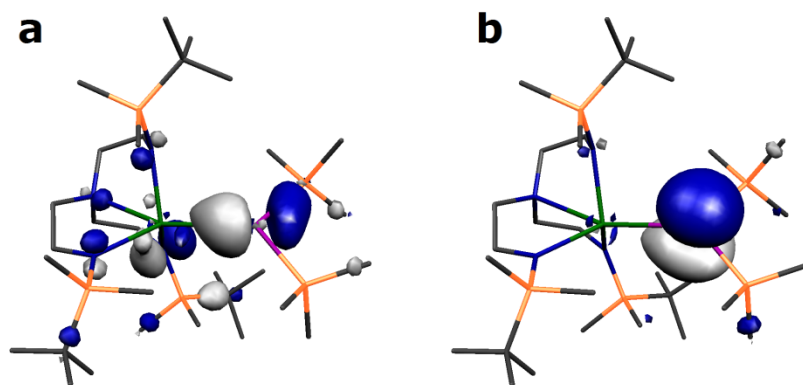

**Figure S29.** Kohn-Sham molecular orbital representations of the principal Th-As interactions of **3ThAs**. HOMO-4 (a, -5.354 eV) and HOMO (b, -3.727 eV).

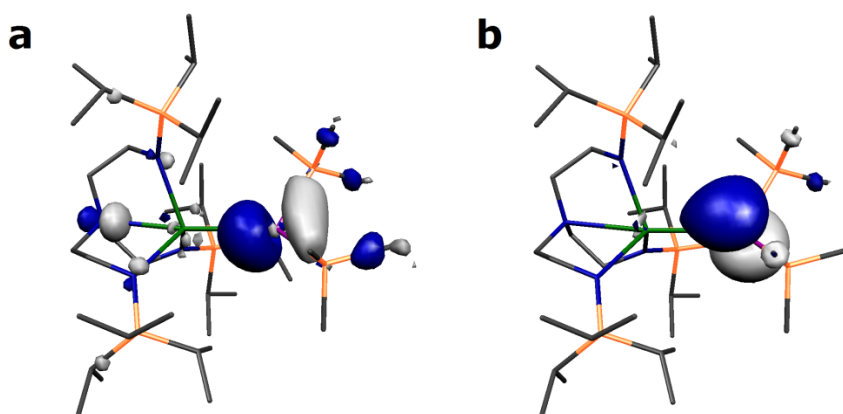

**Figure S30.** Kohn-Sham molecular orbital representations of the principal Th-P interactions of **4ThP**. HOMO-4 (a, -5.558 eV) and HOMO (b, -4.036 eV).

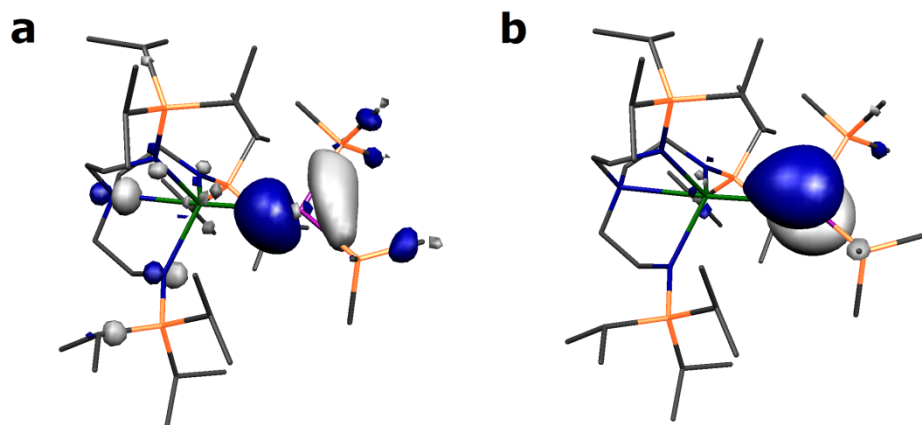

**Figure S31.** Kohn-Sham molecular orbital representations of the principal Th-As interactions of **4ThAs**. HOMO-4 (a, -5.446 eV) and HOMO (b, -3.831 eV).

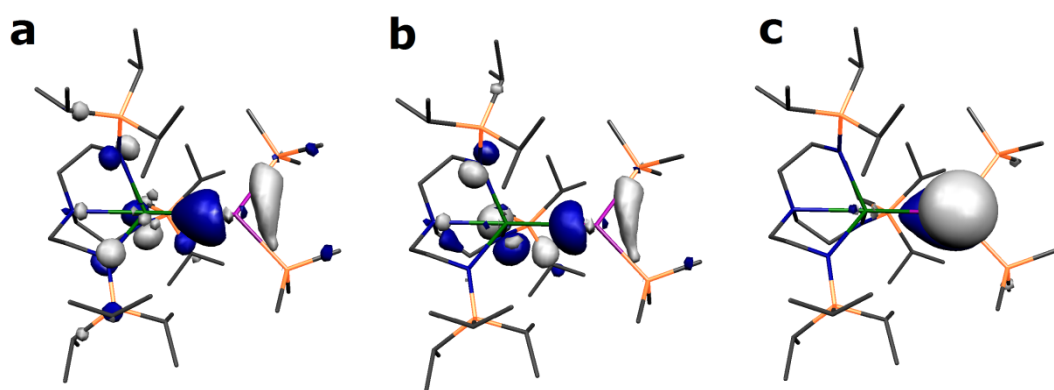

**Figure S32.** Kohn-Sham molecular orbital representations of the principal Th-Sb interactions of **4ThSb**. HOMO-4 (a, -5.271 eV), HOMO-1 (b, -4.977 eV) and HOMO (c, -3.588 eV).



**Table S1. Final Coordinates and Single Point Energy of 3UP After Geometry Optimisation**

|      |           |           |           |
|------|-----------|-----------|-----------|
| 1.C  | 3.274536  | 2.227366  | -4.628646 |
| 2.C  | 0.138621  | 0.788506  | -3.514603 |
| 3.C  | -1.213941 | 0.074518  | -3.445905 |
| 4.C  | 3.512898  | 1.876913  | -3.142398 |
| 5.C  | 3.896493  | 0.390988  | -3.023745 |
| 6.C  | 1.209151  | 3.901371  | -2.600393 |
| 7.C  | 4.686663  | 2.737811  | -2.619750 |
| 8.C  | -2.293547 | 1.917643  | -2.191813 |
| 9.C  | -3.147667 | -0.393151 | -2.030559 |
| 10.C | 1.519684  | -2.925319 | -1.964438 |
| 11.C | -2.718251 | -1.728496 | -1.433711 |
| 12.C | 4.466458  | -2.739163 | -1.011561 |
| 13.C | -2.574345 | 2.387476  | -0.760749 |
| 14.C | -3.187890 | -4.840860 | -0.043851 |
| 15.C | 2.407909  | 2.376618  | -0.243753 |
| 16.C | 2.629176  | -4.746507 | 0.252076  |
| 17.C | -0.929168 | -4.640958 | 1.020416  |
| 18.C | -2.409659 | -4.241426 | 1.148548  |
| 19.C | -0.636601 | 4.631357  | 1.216427  |
| 20.C | -4.380983 | -1.856907 | 1.433783  |
| 21.C | -3.897127 | 4.221180  | 1.975901  |
| 22.C | 4.902928  | 0.053306  | 1.983733  |
| 23.C | -2.983030 | -4.838130 | 2.454536  |
| 24.C | -2.972154 | 3.192772  | 2.667794  |
| 25.C | -3.731520 | 1.860577  | 2.823759  |
| 26.C | 4.287143  | -2.747906 | 3.030344  |
| 27.C | -0.088570 | 1.968153  | 2.711906  |
| 28.C | -1.608751 | -1.669382 | 2.727512  |
| 29.C | -2.610069 | 3.729259  | 4.072087  |
| 30.C | 2.687279  | -0.343817 | 4.066231  |
| 31.H | 4.178082  | 1.992497  | -5.219550 |
| 32.H | 2.442689  | 1.656539  | -5.067680 |
| 33.H | 3.059925  | 3.297240  | -4.771310 |
| 34.H | -1.813015 | 0.265471  | -4.358450 |
| 35.H | 0.788811  | 0.199677  | -4.188127 |
| 36.H | 0.004227  | 1.765149  | -4.016861 |
| 37.H | 0.828638  | 3.906992  | -3.632749 |
| 38.H | 4.849633  | 0.191564  | -3.545388 |
| 39.H | 3.132333  | -0.267215 | -3.462225 |
| 40.H | -1.054570 | -1.012724 | -3.385478 |
| 41.H | 5.572783  | 2.598158  | -3.264831 |
| 42.H | -3.697777 | -0.519500 | -2.984626 |
| 43.H | -3.161240 | 2.132320  | -2.846354 |
| 44.H | 1.977916  | 4.687970  | -2.538072 |
| 45.H | 1.779038  | -3.713052 | -2.689558 |
| 46.H | -1.427659 | 2.466640  | -2.577828 |
| 47.H | 4.450490  | 3.814187  | -2.619151 |
| 48.H | 1.596471  | -1.952877 | -2.475151 |
| 49.H | 0.385687  | 4.192538  | -1.931075 |
| 50.H | 4.633809  | -3.289624 | -1.953455 |
| 51.H | 4.019749  | 0.089829  | -1.974329 |
| 52.H | -2.174584 | -2.325427 | -2.189197 |
| 53.H | 4.979057  | 2.455424  | -1.597300 |
| 54.H | 0.469716  | -3.079322 | -1.668031 |

|       |           |           |           |
|-------|-----------|-----------|-----------|
| 55.H  | -3.814782 | 0.106284  | -1.316003 |
| 56.H  | -3.635519 | -2.303772 | -1.224656 |
| 57.H  | -2.775873 | -4.517054 | -1.010476 |
| 58.H  | 4.732525  | -1.688290 | -1.184457 |
| 59.H  | -2.658262 | 3.489424  | -0.811116 |
| 60.H  | 2.995017  | -5.445325 | -0.519650 |
| 61.H  | 5.164818  | -3.147675 | -0.264585 |
| 62.H  | -3.574318 | 2.030583  | -0.449603 |
| 63.H  | -4.257000 | -4.577743 | -0.022009 |
| 64.H  | -3.124778 | -5.943897 | -0.018559 |
| 65.H  | 3.165337  | 3.162272  | -0.104194 |
| 66.H  | 2.807109  | 1.435983  | 0.166424  |
| 67.H  | 1.623883  | -5.066492 | 0.553616  |
| 68.H  | -0.491626 | -4.251272 | 0.091001  |
| 69.H  | 1.537997  | 2.678530  | 0.360957  |
| 70.H  | -1.258808 | 5.152823  | 0.472688  |
| 71.H  | -5.040855 | -2.304430 | 0.674870  |
| 72.H  | -0.823610 | -5.741120 | 1.007274  |
| 73.H  | 3.290136  | -4.839286 | 1.126160  |
| 74.H  | 0.376816  | 4.550169  | 0.796775  |
| 75.H  | -4.234603 | 3.880834  | 0.985893  |
| 76.H  | 5.423560  | -0.335721 | 1.096004  |
| 77.H  | -4.521900 | -0.766301 | 1.404144  |
| 78.H  | 4.536989  | 1.062711  | 1.743931  |
| 79.H  | -3.406952 | 5.197790  | 1.846050  |
| 80.H  | -0.321202 | -4.256435 | 1.852214  |
| 81.H  | -4.006124 | 1.430558  | 1.849736  |
| 82.H  | -0.578313 | 5.279293  | 2.105293  |
| 83.H  | 4.830365  | -3.216082 | 2.196855  |
| 84.H  | -2.890814 | -5.939206 | 2.436856  |
| 85.H  | -4.050376 | -4.602236 | 2.587196  |
| 86.H  | -4.801745 | 4.387071  | 2.588209  |
| 87.H  | 0.720689  | 1.487893  | 2.129951  |
| 88.H  | -4.737401 | -2.205711 | 2.416201  |
| 89.H  | 5.643559  | 0.148218  | 2.795537  |
| 90.H  | -0.518866 | -1.798605 | 2.630030  |
| 91.H  | -1.819007 | -0.601485 | 2.889254  |
| 92.H  | -2.444513 | -4.481698 | 3.345736  |
| 93.H  | -4.662491 | 2.009668  | 3.399301  |
| 94.H  | 3.537331  | -3.465508 | 3.393712  |
| 95.H  | -0.555750 | 1.182398  | 3.321795  |
| 96.H  | -3.137483 | 1.106441  | 3.360351  |
| 97.H  | 5.012725  | -2.570979 | 3.841445  |
| 98.H  | 0.423107  | 2.655745  | 3.402888  |
| 99.H  | -1.938645 | -2.200241 | 3.633557  |
| 100.H | -2.073584 | 4.690047  | 4.025587  |
| 101.H | 2.244647  | 0.640596  | 3.856317  |
| 102.H | 1.890608  | -0.993066 | 4.458476  |
| 103.H | -3.530359 | 3.897735  | 4.659870  |
| 104.H | -1.985501 | 3.021118  | 4.637797  |
| 105.H | 3.441758  | -0.211243 | 4.858684  |
| 106.N | -1.956887 | 0.471016  | -2.225312 |
| 107.N | 0.718883  | 0.944007  | -2.172020 |
| 108.N | -1.889160 | -1.502891 | -0.229444 |
| 109.N | -1.542903 | 1.947677  | 0.198440  |

|        |           |           |           |
|--------|-----------|-----------|-----------|
| 110.P  | 1.881839  | -1.380277 | 0.954789  |
| 111.Si | 1.938289  | 2.223841  | -2.069048 |
| 112.Si | 2.663143  | -2.977128 | -0.440146 |
| 113.Si | -2.540436 | -2.307184 | 1.210945  |
| 114.Si | -1.344478 | 2.918972  | 1.647949  |
| 115.Si | 3.487438  | -1.100080 | 2.520170  |
| 116.U  | -0.269261 | 0.117377  | -0.281638 |

Energy: -616.08879950 eV

**Table S2. Final Coordinates and Single Point Energy of 3UAs After Geometry Optimisation**

|      |           |           |           |
|------|-----------|-----------|-----------|
| 1.C  | -0.244545 | -1.003499 | -5.934179 |
| 2.C  | 2.146418  | -0.344950 | -5.560023 |
| 3.C  | 0.851442  | -0.819681 | -4.860626 |
| 4.C  | -0.401001 | 1.999140  | -4.416897 |
| 5.C  | 1.124384  | -2.168278 | -4.169890 |
| 6.C  | -2.127631 | -0.481719 | -2.857456 |
| 7.C  | 1.857044  | 1.071826  | -2.577843 |
| 8.C  | 2.484682  | -4.593834 | -1.661306 |
| 9.C  | -3.177077 | -0.507305 | -1.742281 |
| 10.C | 5.006636  | -1.371126 | -1.389602 |
| 11.C | -2.970638 | 1.914063  | -1.271883 |
| 12.C | 0.800907  | 4.692292  | -1.092719 |
| 13.C | -0.402625 | -3.945340 | -0.739115 |
| 14.C | -2.203537 | 2.902068  | -0.386761 |
| 15.C | -3.748465 | 0.348442  | 0.472101  |
| 16.C | 5.038188  | -3.114813 | 1.133353  |
| 17.C | 1.684642  | -5.146537 | 1.191634  |
| 18.C | 1.863696  | 2.627944  | 0.965045  |
| 19.C | -1.257176 | 5.828341  | 1.360823  |
| 20.C | 4.797023  | -0.063938 | 1.382503  |
| 21.C | -3.192928 | -0.787068 | 1.323209  |
| 22.C | -0.202945 | 4.806222  | 1.846274  |
| 23.C | 1.031050  | 5.585615  | 2.356152  |
| 24.C | -0.796442 | 3.989004  | 3.011021  |
| 25.C | -0.526830 | -3.294670 | 3.463188  |
| 26.C | 0.346228  | 0.068977  | 3.626095  |
| 27.C | -2.959817 | -2.959581 | 3.960832  |
| 28.C | -1.547408 | -2.357568 | 4.133980  |
| 29.C | -2.606497 | 0.561523  | 4.275992  |
| 30.C | -1.237048 | -2.274408 | 5.646433  |
| 31.H | 0.073152  | -1.762607 | -6.670498 |
| 32.H | 2.417394  | -1.048919 | -6.367087 |
| 33.H | -0.440099 | -0.073372 | -6.488809 |
| 34.H | -1.198071 | -1.345903 | -5.506928 |
| 35.H | 2.035284  | 0.649909  | -6.019851 |
| 36.H | 0.301548  | 2.370510  | -5.180141 |
| 37.H | 2.997226  | -0.303526 | -4.864137 |
| 38.H | -1.350048 | 1.788529  | -4.931523 |
| 39.H | 1.549302  | -2.893385 | -4.886317 |
| 40.H | 0.205818  | -2.608514 | -3.756195 |
| 41.H | -0.575017 | 2.819016  | -3.703357 |
| 42.H | -2.447510 | 0.235329  | -3.636818 |
| 43.H | -2.141926 | -1.473167 | -3.346599 |
| 44.H | 1.833141  | -2.060381 | -3.336920 |

|      |           |           |           |
|------|-----------|-----------|-----------|
| 45.H | 2.611958  | 1.470629  | -3.271227 |
| 46.H | 2.478663  | -3.949210 | -2.549102 |
| 47.H | 2.093235  | -5.582302 | -1.955292 |
| 48.H | -2.509318 | 1.900458  | -2.265587 |
| 49.H | -4.199739 | -0.394989 | -2.153474 |
| 50.H | 4.727779  | -2.211684 | -2.041912 |
| 51.H | 2.323186  | 0.262403  | -1.992665 |
| 52.H | 4.664575  | -0.443310 | -1.871698 |
| 53.H | 1.207170  | 4.079888  | -1.911039 |
| 54.H | 1.599465  | 1.896831  | -1.896266 |
| 55.H | 6.107684  | -1.335060 | -1.331791 |
| 56.H | 3.530122  | -4.734754 | -1.348977 |
| 57.H | -0.581169 | -3.279628 | -1.596956 |
| 58.H | -4.026219 | 2.231590  | -1.382960 |
| 59.H | -0.071987 | 5.232889  | -1.490226 |
| 60.H | -3.141530 | -1.477824 | -1.225244 |
| 61.H | -0.717696 | -4.962937 | -1.021927 |
| 62.H | -2.170966 | 3.856305  | -0.945869 |
| 63.H | 1.561078  | 5.445882  | -0.833052 |
| 64.H | -1.046349 | -3.614437 | 0.090436  |
| 65.H | -4.801856 | 0.171986  | 0.175534  |
| 66.H | 4.875514  | -4.011087 | 0.517767  |
| 67.H | -0.880139 | 6.452642  | 0.537083  |
| 68.H | 2.144441  | 1.821716  | 0.263085  |
| 69.H | -2.798084 | 3.113733  | 0.521993  |
| 70.H | 1.382740  | -6.155245 | 0.861124  |
| 71.H | 4.379338  | 0.874235  | 0.988102  |
| 72.H | -3.709933 | 1.273477  | 1.062148  |
| 73.H | -3.353012 | -1.755559 | 0.815110  |
| 74.H | -2.183582 | 5.345263  | 1.018312  |
| 75.H | 6.127279  | -2.975772 | 1.237016  |
| 76.H | 5.895707  | 0.027761  | 1.376402  |
| 77.H | 2.742767  | -5.193064 | 1.488879  |
| 78.H | 2.745103  | 3.285131  | 1.019935  |
| 79.H | 1.499710  | 6.187171  | 1.561699  |
| 80.H | 4.621750  | -3.309524 | 2.131904  |
| 81.H | -1.530806 | 6.507842  | 2.187744  |
| 82.H | 1.096763  | -4.887977 | 2.081669  |
| 83.H | 1.740430  | 2.171877  | 1.958074  |
| 84.H | 4.469076  | -0.163724 | 2.427884  |
| 85.H | -3.809088 | -0.842557 | 2.236109  |
| 86.H | 1.800181  | 4.917012  | 2.771589  |
| 87.H | -0.723673 | -3.394459 | 2.386844  |
| 88.H | -1.670377 | 3.401447  | 2.694266  |
| 89.H | -3.214706 | -3.117602 | 2.903043  |
| 90.H | 0.732931  | 6.282660  | 3.159765  |
| 91.H | 1.097550  | -0.467685 | 3.024698  |
| 92.H | -0.064832 | 3.286776  | 3.436639  |
| 93.H | 0.399911  | 1.140097  | 3.381211  |
| 94.H | -1.118826 | 4.657048  | 3.829445  |
| 95.H | 0.505459  | -2.931282 | 3.571023  |
| 96.H | -0.576616 | -4.303820 | 3.910942  |
| 97.H | -2.622605 | 1.562255  | 3.818802  |
| 98.H | -3.742736 | -2.329079 | 4.410572  |
| 99.H | -3.012269 | -3.945213 | 4.457833  |

|        |           |           |           |
|--------|-----------|-----------|-----------|
| 100.H  | -3.641091 | 0.188391  | 4.308498  |
| 101.H  | 0.624821  | -0.029495 | 4.686337  |
| 102.H  | -2.276358 | 0.684755  | 5.319823  |
| 103.H  | -0.227579 | -1.882388 | 5.843441  |
| 104.H  | -1.288181 | -3.282780 | 6.096008  |
| 105.H  | -1.957957 | -1.640188 | 6.185292  |
| 106.As | 1.897515  | -1.662737 | 0.392240  |
| 107.N  | -0.801326 | -0.144297 | -2.319080 |
| 108.N  | -2.892556 | 0.534929  | -0.725910 |
| 109.N  | -0.858380 | 2.413977  | -0.029212 |
| 110.N  | -1.758396 | -0.556085 | 1.605364  |
| 111.Si | 0.330945  | 0.482007  | -3.527104 |
| 112.Si | 1.434070  | -3.906750 | -0.228262 |
| 113.Si | 4.260981  | -1.565275 | 0.349885  |
| 114.Si | 0.340419  | 3.620365  | 0.410915  |
| 115.Si | -1.403771 | -0.591055 | 3.343230  |
| 116.U  | -0.401355 | 0.183016  | -0.095319 |

Energy: -615.33981340 eV

**Table S3. Final Coordinates and Single Point Energy of 3USb After Geometry Optimisation**

|      |           |           |           |
|------|-----------|-----------|-----------|
| 1.C  | 0.712561  | 2.706874  | -5.350870 |
| 2.C  | 3.011105  | 3.032296  | -4.394613 |
| 3.C  | 1.867403  | -0.313599 | -4.293912 |
| 4.C  | 1.530271  | 2.760190  | -4.039917 |
| 5.C  | -0.187062 | -3.956289 | -3.319861 |
| 6.C  | 1.006343  | 3.919763  | -3.169723 |
| 7.C  | -1.351485 | 0.757749  | -3.185760 |
| 8.C  | -2.398711 | -0.256786 | -2.712634 |
| 9.C  | 1.413059  | -5.439999 | -2.091049 |
| 10.C | 0.084787  | -4.652711 | -1.971099 |
| 11.C | -1.041845 | -5.669128 | -1.673412 |
| 12.C | 2.660489  | 1.112816  | -1.645074 |
| 13.C | -3.480836 | 1.059382  | -0.915578 |
| 14.C | -2.299604 | -2.530450 | -0.731043 |
| 15.C | 1.957285  | -2.491117 | -0.756327 |
| 16.C | -3.268568 | -1.352515 | -0.670200 |
| 17.C | -2.077867 | 4.507915  | -0.319970 |
| 18.C | -3.152711 | 1.503924  | 0.506541  |
| 19.C | 0.647986  | 3.506106  | 0.660238  |
| 20.C | 0.310477  | -4.321013 | 1.112779  |
| 21.C | 4.909003  | -0.590703 | 1.672028  |
| 22.C | 3.681216  | -3.203541 | 2.721483  |
| 23.C | -1.210462 | 5.477651  | 2.859769  |
| 24.C | -1.641426 | 3.998025  | 2.727954  |
| 25.C | -3.153696 | 3.898007  | 3.029433  |
| 26.C | -1.894716 | -1.276544 | 3.396536  |
| 27.C | -0.878298 | 3.154918  | 3.767688  |
| 28.C | 4.340242  | -0.961162 | 4.686442  |
| 29.C | 0.300216  | -2.908815 | 4.846554  |
| 30.C | -0.416420 | -0.133455 | 5.836937  |
| 31.H | 0.839693  | 3.649253  | -5.913239 |
| 32.H | 1.036880  | 1.887066  | -6.009953 |
| 33.H | -0.364471 | 2.584167  | -5.163886 |
| 34.H | 3.097252  | 3.985839  | -4.946117 |
| 35.H | 3.437882  | 2.246060  | -5.036911 |

|      |           |           |           |
|------|-----------|-----------|-----------|
| 36.H | 2.748518  | -0.058103 | -4.903028 |
| 37.H | 1.040086  | -0.533020 | -4.986525 |
| 38.H | -0.204435 | -4.698483 | -4.138179 |
| 39.H | -1.129890 | 0.502876  | -4.238570 |
| 40.H | 2.096594  | -1.245247 | -3.755314 |
| 41.H | 1.043388  | 4.870060  | -3.731554 |
| 42.H | 3.644325  | 3.115442  | -3.497745 |
| 43.H | 0.587714  | -3.215294 | -3.564989 |
| 44.H | -1.156936 | -3.437433 | -3.333296 |
| 45.H | -3.338190 | -0.145184 | -3.289167 |
| 46.H | -1.801341 | 1.767755  | -3.215222 |
| 47.H | 1.305697  | -6.244961 | -2.839866 |
| 48.H | -2.005324 | -1.265262 | -2.887880 |
| 49.H | -0.034616 | 3.759318  | -2.854008 |
| 50.H | -1.104777 | -6.413609 | -2.487527 |
| 51.H | 2.245840  | -4.798603 | -2.415180 |
| 52.H | 1.610304  | 4.059057  | -2.261257 |
| 53.H | 3.656595  | 0.818542  | -2.010893 |
| 54.H | -2.388682 | -3.015194 | -1.720264 |
| 55.H | -2.030037 | -5.195333 | -1.587368 |
| 56.H | -3.209717 | 1.870426  | -1.603467 |
| 57.H | 2.040567  | -2.002398 | -1.737510 |
| 58.H | 1.704277  | -5.915865 | -1.141665 |
| 59.H | -1.820451 | 4.199952  | -1.344778 |
| 60.H | -4.223474 | -1.597239 | -1.176399 |
| 61.H | 2.760142  | 2.113420  | -1.201058 |
| 62.H | -4.558179 | 0.838415  | -1.050963 |
| 63.H | -0.855784 | -6.221524 | -0.739940 |
| 64.H | 2.452037  | 0.413101  | -0.812374 |
| 65.H | 2.793031  | -3.200267 | -0.669822 |
| 66.H | -3.175046 | 4.504790  | -0.234056 |
| 67.H | -1.746524 | 5.550790  | -0.197978 |
| 68.H | 0.915791  | 3.132098  | -0.339943 |
| 69.H | -2.650782 | -3.285008 | -0.001124 |
| 70.H | 2.114342  | -1.738196 | 0.038665  |
| 71.H | -3.503147 | -1.123552 | 0.379343  |
| 72.H | 0.959406  | 4.561618  | 0.690975  |
| 73.H | 4.622595  | -0.852558 | 0.642097  |
| 74.H | -3.729280 | 2.420109  | 0.714769  |
| 75.H | 0.947888  | -5.218499 | 1.083862  |
| 76.H | -3.528279 | 0.761251  | 1.233229  |
| 77.H | -0.703074 | -4.636552 | 1.405104  |
| 78.H | 1.236259  | 2.952970  | 1.408303  |
| 79.H | 4.958020  | 0.506412  | 1.739126  |
| 80.H | 3.393339  | -3.501535 | 1.703536  |
| 81.H | 5.921648  | -0.988570 | 1.848296  |
| 82.H | 0.694556  | -3.654998 | 1.898870  |
| 83.H | -1.769908 | 6.135950  | 2.176925  |
| 84.H | -3.766590 | 4.455690  | 2.304012  |
| 85.H | -0.136495 | 5.617480  | 2.661849  |
| 86.H | -1.838047 | -1.934501 | 2.515448  |
| 87.H | 4.694445  | -3.594254 | 2.914472  |
| 88.H | -2.217176 | -0.279931 | 3.056546  |
| 89.H | -3.500880 | 2.854371  | 3.040977  |
| 90.H | 2.992439  | -3.695362 | 3.422853  |

|        |           |           |           |
|--------|-----------|-----------|-----------|
| 91.H   | -1.401352 | 5.834727  | 3.887852  |
| 92.H   | 0.212082  | 3.217183  | 3.644009  |
| 93.H   | -3.367421 | 4.321237  | 4.027420  |
| 94.H   | -1.148644 | 2.092486  | 3.696707  |
| 95.H   | -2.669753 | -1.671003 | 4.074401  |
| 96.H   | 0.367628  | -3.633322 | 4.023473  |
| 97.H   | 5.338547  | -1.411879 | 4.816461  |
| 98.H   | -1.117624 | 3.497799  | 4.790399  |
| 99.H   | 4.421742  | 0.119360  | 4.874315  |
| 100.H  | 1.268258  | -2.894674 | 5.367975  |
| 101.H  | 3.677923  | -1.384647 | 5.455949  |
| 102.H  | -0.456560 | -3.277974 | 5.559317  |
| 103.H  | -0.746513 | 0.891216  | 5.616832  |
| 104.H  | 0.525188  | -0.066004 | 6.401695  |
| 105.H  | -1.172220 | -0.604261 | 6.489115  |
| 106.N  | -0.146155 | 0.746879  | -2.338358 |
| 107.N  | -2.658811 | -0.131504 | -1.254218 |
| 108.N  | -0.922676 | -2.089642 | -0.470611 |
| 109.N  | -1.692344 | 1.692087  | 0.639537  |
| 110.Sb | 1.447798  | -0.035049 | 2.581594  |
| 111.Si | 1.409500  | 1.079477  | -3.081560 |
| 112.Si | 0.296379  | -3.372391 | -0.523280 |
| 113.Si | -1.217692 | 3.368648  | 0.945459  |
| 114.Si | 3.681839  | -1.311938 | 2.936513  |
| 115.Si | -0.195309 | -1.168163 | 4.256707  |
| 116.U  | -0.297865 | 0.082452  | -0.174865 |

Energy: -614.17269560 eV

**Table S4. Final Coordinates and Single Point Energy of 3UBi After Geometry Optimisation**

|      |           |           |           |
|------|-----------|-----------|-----------|
| 1.C  | 3.335064  | 2.230800  | -4.034031 |
| 2.C  | 0.303779  | 1.736245  | -3.705252 |
| 3.C  | 1.475075  | 4.556800  | -3.411242 |
| 4.C  | 1.776243  | -4.746236 | -3.173520 |
| 5.C  | 2.940073  | -1.607912 | -2.946114 |
| 6.C  | -0.638532 | -2.252298 | -2.572750 |
| 7.C  | -2.019527 | -1.606207 | -2.496303 |
| 8.C  | 1.978899  | -4.291181 | -1.709293 |
| 9.C  | 3.392236  | -4.741465 | -1.265076 |
| 10.C | -3.686870 | 4.452845  | -1.115191 |
| 11.C | -3.133670 | 1.011743  | -1.291477 |
| 12.C | 5.476582  | 0.579055  | -1.067893 |
| 13.C | -3.585040 | -0.426418 | -1.054918 |
| 14.C | 0.945009  | -4.986028 | -0.800054 |
| 15.C | -1.263297 | 4.783782  | -0.577701 |
| 16.C | 5.512650  | 3.521444  | -0.248986 |
| 17.C | -2.584628 | -2.553946 | -0.278479 |
| 18.C | -2.632058 | 4.393501  | 0.012523  |
| 19.C | 2.629361  | -1.858474 | 0.121264  |
| 20.C | -3.023458 | 5.413862  | 1.107379  |
| 21.C | -2.477867 | -2.257159 | 1.221623  |
| 22.C | -4.201904 | 2.209373  | 1.592590  |
| 23.C | 4.795243  | 1.352422  | 1.825754  |
| 24.C | -1.231002 | 2.652555  | 2.195837  |
| 25.C | 0.279117  | -3.478777 | 3.135495  |
| 26.C | 0.939482  | -0.434147 | 3.133766  |

|      |           |           |           |
|------|-----------|-----------|-----------|
| 27.C | -2.332034 | -0.160422 | 4.581735  |
| 28.C | -1.568399 | -1.497812 | 4.648066  |
| 29.C | -2.587552 | -2.653282 | 4.776464  |
| 30.C | -0.664830 | -1.496169 | 5.903209  |
| 31.H | 3.171438  | 2.485571  | -5.094722 |
| 32.H | 0.162375  | 1.906225  | -4.785906 |
| 33.H | 1.379232  | 4.703515  | -4.500934 |
| 34.H | 3.551288  | 1.155091  | -3.976585 |
| 35.H | 2.543332  | -4.322883 | -3.839308 |
| 36.H | 2.442779  | -1.708599 | -3.922546 |
| 37.H | 4.226723  | 2.775991  | -3.692689 |
| 38.H | 0.793836  | -4.461852 | -3.577230 |
| 39.H | 1.853072  | -5.846260 | -3.242488 |
| 40.H | -0.272340 | -2.126397 | -3.609483 |
| 41.H | 0.444416  | 0.657080  | -3.538801 |
| 42.H | 2.303240  | 5.186409  | -3.053285 |
| 43.H | 0.552719  | 4.920033  | -2.936200 |
| 44.H | 3.937547  | -2.066305 | -3.027904 |
| 45.H | -0.620651 | 2.041837  | -3.190696 |
| 46.H | -2.002807 | -0.642430 | -3.025357 |
| 47.H | -2.782400 | -2.240671 | -2.989259 |
| 48.H | 3.075555  | -0.535720 | -2.747097 |
| 49.H | -0.746256 | -3.342620 | -2.429377 |
| 50.H | -2.794685 | 1.137599  | -2.335320 |
| 51.H | 5.406101  | 0.817160  | -2.139208 |
| 52.H | -3.414840 | 3.810447  | -1.965756 |
| 53.H | 4.188882  | -4.241497 | -1.837609 |
| 54.H | -4.341864 | -0.757104 | -1.793572 |
| 55.H | 3.507721  | -5.828262 | -1.426040 |
| 56.H | -3.766612 | 5.484749  | -1.502057 |
| 57.H | 5.460779  | 3.849350  | -1.298024 |
| 58.H | -0.950031 | 4.078753  | -1.360598 |
| 59.H | -4.020261 | 1.660687  | -1.201339 |
| 60.H | 6.545947  | 0.552209  | -0.796823 |
| 61.H | 1.060106  | -6.083523 | -0.859038 |
| 62.H | -0.090607 | -4.753605 | -1.089609 |
| 63.H | -1.312281 | 5.790851  | -1.029600 |
| 64.H | -4.690436 | 4.158724  | -0.769878 |
| 65.H | 5.064752  | -0.429174 | -0.919473 |
| 66.H | 3.571571  | -4.547029 | -0.197526 |
| 67.H | -1.779832 | -3.247181 | -0.550743 |
| 68.H | -3.553335 | -3.036479 | -0.514188 |
| 69.H | 6.577344  | 3.411426  | 0.018657  |
| 70.H | -4.033578 | -0.489062 | -0.055238 |
| 71.H | 5.081708  | 4.321232  | 0.370892  |
| 72.H | -0.465801 | 4.800803  | 0.179325  |
| 73.H | 1.065832  | -4.698812 | 0.254806  |
| 74.H | 3.690004  | -2.140012 | 0.190477  |
| 75.H | 2.596359  | -0.760199 | 0.255441  |
| 76.H | -3.036414 | 6.434455  | 0.684240  |
| 77.H | -5.031956 | 2.211660  | 0.869935  |
| 78.H | 2.107868  | -2.338733 | 0.962054  |
| 79.H | -4.026946 | 5.217845  | 1.517025  |
| 80.H | -3.390740 | -1.734118 | 1.562420  |
| 81.H | -2.310027 | 5.419137  | 1.946126  |



|        |           |           |           |
|--------|-----------|-----------|-----------|
| 82.H   | -2.489918 | -3.236902 | 1.733513  |
| 83.H   | 5.863663  | 1.295154  | 2.091837  |
| 84.H   | -0.244464 | 3.013341  | 1.866872  |
| 85.H   | -4.168394 | 1.214779  | 2.062514  |
| 86.H   | 4.350686  | 0.362608  | 2.009441  |
| 87.H   | -4.456532 | 2.935950  | 2.379634  |
| 88.H   | 4.314704  | 2.069062  | 2.508724  |
| 89.H   | 1.345782  | -0.093927 | 2.159092  |
| 90.H   | -1.106768 | 1.647809  | 2.628416  |
| 91.H   | 1.126474  | -3.572499 | 2.439460  |
| 92.H   | -0.463919 | -4.239422 | 2.848346  |
| 93.H   | -1.573635 | 3.302748  | 3.015259  |
| 94.H   | 1.811116  | -0.854754 | 3.659902  |
| 95.H   | -2.970213 | -0.095144 | 3.688741  |
| 96.H   | 0.637997  | 0.473565  | 3.676259  |
| 97.H   | -3.298641 | -2.674861 | 3.937437  |
| 98.H   | 0.646073  | -3.738445 | 4.141140  |
| 99.H   | -1.651352 | 0.702932  | 4.565764  |
| 100.H  | -2.095742 | -3.636435 | 4.828675  |
| 101.H  | -2.981324 | -0.043573 | 5.467492  |
| 102.H  | -3.179572 | -2.533157 | 5.701282  |
| 103.H  | -0.105174 | -2.437806 | 6.015675  |
| 104.H  | 0.064003  | -0.670841 | 5.889680  |
| 105.H  | -1.281345 | -1.373539 | 6.811646  |
| 106.Bi | 1.951314  | 2.340547  | -0.349753 |
| 107.N  | 0.271054  | -1.666311 | -1.578505 |
| 108.N  | -2.399166 | -1.321718 | -1.089187 |
| 109.N  | -2.060390 | 1.356426  | -0.334269 |
| 110.N  | -1.274513 | -1.470072 | 1.540317  |
| 111.Si | 1.794103  | 2.719338  | -3.027864 |
| 112.Si | 1.900529  | -2.354972 | -1.554734 |
| 113.Si | 4.586853  | 1.876925  | 0.004514  |
| 114.Si | -2.515845 | 2.630178  | 0.805270  |
| 115.Si | -0.462189 | -1.728056 | 3.074356  |
| 116.U  | -0.350292 | -0.119707 | -0.023230 |

Energy: -613.55688129 eV

**Table S5. Final Coordinates and Single Point Energy of 4UP After Geometry Optimisation**

|      |           |           |           |
|------|-----------|-----------|-----------|
| 1.C  | -0.232900 | -1.337475 | -5.897086 |
| 2.C  | 3.489645  | -0.731935 | -5.476165 |
| 3.C  | 1.017650  | -3.391028 | -5.174532 |
| 4.C  | 2.377339  | 1.409333  | -4.758915 |
| 5.C  | 0.328970  | -2.100402 | -4.676668 |
| 6.C  | 2.780923  | -0.008842 | -4.309705 |
| 7.C  | -1.952217 | 0.377029  | -3.155419 |
| 8.C  | -0.514503 | 0.880954  | -3.192577 |
| 9.C  | 3.592722  | -2.915192 | -2.681916 |
| 10.C | 2.308099  | -2.223526 | -2.184413 |
| 11.C | -0.221512 | 4.646639  | -1.569095 |
| 12.C | 1.377712  | -3.247789 | -1.512661 |
| 13.C | -3.255801 | -0.861781 | -1.467953 |
| 14.C | -3.074162 | 1.591917  | -1.328466 |
| 15.C | 3.223587  | 2.011260  | -1.104110 |
| 16.C | -2.363190 | -2.014710 | -1.017263 |
| 17.C | -2.457672 | 5.429395  | -0.689599 |

|      |           |           |           |
|------|-----------|-----------|-----------|
| 18.C | 5.349512  | -0.071786 | -0.380780 |
| 19.C | -1.037862 | 4.965718  | -0.304609 |
| 20.C | -2.816195 | 1.844490  | 0.151813  |
| 21.C | -5.103534 | -2.671973 | 1.095077  |
| 22.C | -0.576072 | -4.830151 | 1.271479  |
| 23.C | -2.042708 | -4.382174 | 1.416255  |
| 24.C | 4.746786  | 2.245887  | 1.522078  |
| 25.C | 1.632454  | 4.873014  | 1.570747  |
| 26.C | 0.881801  | 3.530313  | 1.686011  |
| 27.C | -4.074170 | -2.013996 | 2.040916  |
| 28.C | -2.780465 | -5.289599 | 2.423823  |
| 29.C | -2.193677 | 4.135617  | 2.415266  |
| 30.C | -1.794681 | 5.478469  | 3.065844  |
| 31.C | 5.014533  | -1.165334 | 3.198851  |
| 32.C | -1.083827 | -1.798722 | 3.093479  |
| 33.C | 2.662687  | -3.071296 | 3.098449  |
| 34.C | 1.019642  | 2.972494  | 3.115067  |
| 35.C | -4.526569 | -2.240128 | 3.500776  |
| 36.C | -1.399248 | -0.330153 | 3.431790  |
| 37.C | -2.527736 | 3.085017  | 3.489763  |
| 38.C | -1.030729 | -2.649153 | 4.377722  |
| 39.C | 2.448206  | -0.430464 | 4.656826  |
| 40.H | -0.869049 | -2.002772 | -6.506538 |
| 41.H | 0.574821  | -0.979295 | -6.553228 |
| 42.H | 2.823211  | -0.839034 | -6.346066 |
| 43.H | 4.365294  | -0.150769 | -5.813057 |
| 44.H | 0.329224  | -3.968269 | -5.816196 |
| 45.H | 1.911266  | -3.170590 | -5.777461 |
| 46.H | -0.844361 | -0.466014 | -5.627157 |
| 47.H | 1.647080  | 1.385380  | -5.583104 |
| 48.H | 3.846850  | -1.735413 | -5.207924 |
| 49.H | 3.259451  | 1.957481  | -5.131891 |
| 50.H | 1.326270  | -4.048924 | -4.351146 |
| 51.H | -0.534579 | -2.422025 | -4.061093 |
| 52.H | -0.198652 | 0.990489  | -4.241049 |
| 53.H | 1.947126  | 2.001533  | -3.940709 |
| 54.H | -2.633311 | 1.000111  | -3.765835 |
| 55.H | 3.529623  | 0.119021  | -3.504117 |
| 56.H | -1.976100 | -0.642343 | -3.561684 |
| 57.H | 3.391634  | -3.651626 | -3.474233 |
| 58.H | 4.328832  | -2.199949 | -3.074208 |
| 59.H | -0.485781 | 1.907317  | -2.783308 |
| 60.H | -0.148488 | 5.525447  | -2.232056 |
| 61.H | -3.862535 | -1.122231 | -2.355933 |
| 62.H | 1.003700  | -4.002956 | -2.220346 |
| 63.H | -0.697106 | 3.842704  | -2.151838 |
| 64.H | 4.076224  | -3.456894 | -1.851879 |
| 65.H | -2.629886 | 2.414717  | -1.904528 |
| 66.H | -1.660205 | -2.261007 | -1.833849 |
| 67.H | 4.034907  | 2.391998  | -1.744174 |
| 68.H | 2.550419  | 1.416099  | -1.737647 |
| 69.H | -4.156723 | 1.559992  | -1.562287 |
| 70.H | -2.414412 | 6.264814  | -1.409490 |
| 71.H | 0.803210  | 4.317831  | -1.343453 |
| 72.H | 2.618594  | -1.524781 | -1.380997 |

|       |           |           |           |
|-------|-----------|-----------|-----------|
| 73.H  | 4.975234  | -0.776007 | -1.137858 |
| 74.H  | -3.040725 | 4.627426  | -1.169674 |
| 75.H  | 0.496002  | -2.779728 | -1.044688 |
| 76.H  | -2.981102 | -2.919275 | -0.891555 |
| 77.H  | 6.111179  | 0.569742  | -0.854945 |
| 78.H  | -3.946117 | -0.612060 | -0.652567 |
| 79.H  | 1.910240  | -3.784644 | -0.711616 |
| 80.H  | 2.663186  | 2.881547  | -0.733839 |
| 81.H  | -0.548166 | 5.826949  | 0.188841  |
| 82.H  | -3.032565 | 5.780202  | 0.179611  |
| 83.H  | -4.927864 | -2.449592 | 0.034256  |
| 84.H  | 5.847377  | -0.659067 | 0.403990  |
| 85.H  | -2.526027 | -4.547102 | 0.433051  |
| 86.H  | -3.380819 | 2.745315  | 0.444619  |
| 87.H  | 1.685841  | 5.243844  | 0.537596  |
| 88.H  | -0.020225 | -4.206366 | 0.561647  |
| 89.H  | -3.258766 | 1.019553  | 0.739667  |
| 90.H  | -0.517045 | -5.873978 | 0.919503  |
| 91.H  | 5.403478  | 2.924617  | 0.951664  |
| 92.H  | -5.107379 | -3.767366 | 1.200629  |
| 93.H  | -6.122949 | -2.323241 | 1.333839  |
| 94.H  | 1.396918  | 2.805733  | 1.025245  |
| 95.H  | 2.668362  | 4.767046  | 1.933287  |
| 96.H  | -3.133090 | 4.328268  | 1.863174  |
| 97.H  | -4.111485 | -0.921797 | 1.860820  |
| 98.H  | 3.987655  | 2.857271  | 2.030432  |
| 99.H  | -2.646635 | -6.350333 | 2.149314  |
| 100.H | 1.158621  | 5.658251  | 2.179548  |
| 101.H | 5.362297  | 1.760061  | 2.292214  |
| 102.H | -0.045125 | -4.786559 | 2.234611  |
| 103.H | -1.627872 | 6.272696  | 2.323061  |
| 104.H | -3.861999 | -5.096637 | 2.456760  |
| 105.H | 3.069814  | -3.590416 | 2.218723  |
| 106.H | 5.507451  | -1.694072 | 2.371500  |
| 107.H | -1.375163 | 0.333545  | 2.552016  |
| 108.H | -0.070799 | -1.821075 | 2.645803  |
| 109.H | 5.404415  | -0.139167 | 3.234498  |
| 110.H | -2.923025 | 2.160495  | 3.048443  |
| 111.H | -2.390776 | -5.171373 | 3.446694  |
| 112.H | 0.563397  | 1.979598  | 3.217551  |
| 113.H | 1.576101  | -3.231782 | 3.110984  |
| 114.H | 2.083108  | 2.863691  | 3.383537  |
| 115.H | -5.569122 | -1.903698 | 3.634797  |
| 116.H | -0.872991 | 5.384210  | 3.660778  |
| 117.H | -2.585497 | 5.829441  | 3.750570  |
| 118.H | -4.493295 | -3.304006 | 3.779777  |
| 119.H | 0.562334  | 3.643652  | 3.857274  |
| 120.H | 3.081925  | -3.544973 | 4.001782  |
| 121.H | -2.396677 | -0.222231 | 3.880913  |
| 122.H | 5.309787  | -1.663454 | 4.137348  |
| 123.H | -1.646269 | 2.811569  | 4.087006  |
| 124.H | -3.911396 | -1.689968 | 4.224859  |
| 125.H | -3.289572 | 3.471767  | 4.188784  |
| 126.H | -0.675919 | 0.075603  | 4.155765  |
| 127.H | -0.711259 | -3.681999 | 4.181800  |

|        |           |           |           |
|--------|-----------|-----------|-----------|
| 128.H  | -2.008992 | -2.696528 | 4.878031  |
| 129.H  | 2.720915  | 0.633506  | 4.712701  |
| 130.H  | 1.352051  | -0.494624 | 4.707757  |
| 131.H  | -0.317638 | -2.217356 | 5.098943  |
| 132.H  | 2.858556  | -0.937309 | 5.545909  |
| 133.N  | 0.368072  | -0.026753 | -2.413238 |
| 134.N  | -2.411652 | 0.329556  | -1.743008 |
| 135.N  | -1.632461 | -1.646475 | 0.221994  |
| 136.N  | -1.357248 | 1.962216  | 0.421305  |
| 137.P  | 2.265676  | -0.232407 | 1.214484  |
| 138.Si | 1.412989  | -1.066443 | -3.425697 |
| 139.Si | 3.948815  | 0.997286  | 0.330282  |
| 140.Si | -0.933826 | 3.579052  | 1.049326  |
| 141.Si | -2.212166 | -2.473552 | 1.692735  |
| 142.Si | 3.119034  | -1.230696 | 3.071485  |
| 143.U  | -0.200191 | 0.057390  | -0.193707 |

Energy: -759.98555202 eV

**Table S6. Final Coordinates and Single Point Energy of 4UAs After Geometry Optimisation**

|      |           |           |           |
|------|-----------|-----------|-----------|
| 1.C  | -0.100273 | -0.440090 | -6.058248 |
| 2.C  | 2.690131  | -2.703401 | -5.196101 |
| 3.C  | 0.835317  | 1.696513  | -5.093850 |
| 4.C  | 1.004219  | 0.166445  | -5.164989 |
| 5.C  | 0.689679  | -3.610406 | -3.967709 |
| 6.C  | 1.830003  | -2.573703 | -3.918884 |
| 7.C  | 4.178916  | -0.087162 | -3.294131 |
| 8.C  | -2.289658 | -0.002780 | -2.957087 |
| 9.C  | -1.314746 | -1.169257 | -2.844682 |
| 10.C | 2.829106  | 0.010010  | -2.557234 |
| 11.C | 2.632824  | 1.442692  | -2.038939 |
| 12.C | -2.644095 | 2.068739  | -1.662618 |
| 13.C | -1.264986 | 2.709923  | -1.549276 |
| 14.C | 0.769245  | 5.483683  | -1.173800 |
| 15.C | -3.627716 | -0.060762 | -0.887146 |
| 16.C | 1.526182  | -3.705088 | -0.350683 |
| 17.C | 4.502877  | -2.886104 | -0.253872 |
| 18.C | -2.609544 | -4.121231 | -0.174393 |
| 19.C | 1.002473  | 4.909013  | 0.238687  |
| 20.C | 2.426913  | 4.335221  | 0.347993  |
| 21.C | -4.858409 | -3.402250 | 0.723629  |
| 22.C | -3.355134 | -0.062190 | 0.612509  |
| 23.C | -2.009482 | 4.743403  | 0.972478  |
| 24.C | -3.376434 | -3.648583 | 1.072469  |
| 25.C | 5.033904  | 1.249876  | 1.284060  |
| 26.C | -1.809809 | 6.198175  | 1.448715  |
| 27.C | -3.124486 | 4.072924  | 1.799300  |
| 28.C | 3.117511  | -4.048645 | 2.225400  |
| 29.C | 0.224354  | 2.963675  | 2.514053  |
| 30.C | -0.836639 | -2.909072 | 2.730787  |
| 31.C | -0.877113 | -4.418888 | 3.045966  |
| 32.C | 5.101733  | -1.118923 | 3.232769  |
| 33.C | -0.680862 | 1.892191  | 3.144082  |
| 34.C | -3.727998 | -1.681742 | 3.413274  |
| 35.C | 0.565016  | 4.043586  | 3.561461  |
| 36.C | 3.382786  | 1.291704  | 3.880944  |

|      |           |           |           |
|------|-----------|-----------|-----------|
| 37.C | -0.303312 | -2.132153 | 3.949994  |
| 38.C | -3.390397 | -0.372781 | 4.150412  |
| 39.C | -3.997446 | -2.822910 | 4.418839  |
| 40.H | -0.075114 | 0.014729  | -7.064224 |
| 41.H | 0.005096  | -1.526847 | -6.187282 |
| 42.H | 2.095169  | -2.515138 | -6.103590 |
| 43.H | 0.695032  | 2.118672  | -6.104203 |
| 44.H | 1.962372  | -0.019997 | -5.690174 |
| 45.H | -1.107033 | -0.250016 | -5.653255 |
| 46.H | 3.096249  | -3.725540 | -5.284696 |
| 47.H | 3.542352  | -2.010893 | -5.215309 |
| 48.H | 0.013347  | -3.434707 | -4.819156 |
| 49.H | 1.709475  | 2.192849  | -4.652220 |
| 50.H | -0.044251 | 1.989591  | -4.498337 |
| 51.H | 4.176326  | 0.483705  | -4.236757 |
| 52.H | 1.099704  | -4.627103 | -4.093562 |
| 53.H | -1.225380 | -1.653884 | -3.828913 |
| 54.H | 4.454213  | -1.123386 | -3.532501 |
| 55.H | -1.841840 | 0.764163  | -3.602276 |
| 56.H | -3.257437 | -0.300740 | -3.403240 |
| 57.H | 2.474729  | -2.855572 | -3.064934 |
| 58.H | 0.084608  | -3.613675 | -3.051971 |
| 59.H | 2.676224  | 2.185444  | -2.848099 |
| 60.H | 4.987575  | 0.327363  | -2.668893 |
| 61.H | -3.175971 | 2.369792  | -2.585530 |
| 62.H | -0.645160 | 2.391756  | -2.406489 |
| 63.H | -1.756939 | -1.942056 | -2.187899 |
| 64.H | 0.877462  | 4.705597  | -1.944971 |
| 65.H | 2.897844  | -0.627035 | -1.653819 |
| 66.H | -1.378563 | 3.799784  | -1.663630 |
| 67.H | 1.672864  | 1.604056  | -1.518822 |
| 68.H | 1.509447  | 6.269009  | -1.403074 |
| 69.H | 3.425060  | 1.693213  | -1.318603 |
| 70.H | -0.228769 | 5.933093  | -1.290392 |
| 71.H | -3.695762 | -1.101725 | -1.230087 |
| 72.H | -4.583582 | 0.440805  | -1.133156 |
| 73.H | 4.411898  | -2.311311 | -1.186716 |
| 74.H | 1.925363  | -4.579741 | -0.888257 |
| 75.H | 1.124319  | -3.005777 | -1.097448 |
| 76.H | -3.249203 | 2.390270  | -0.805233 |
| 77.H | -2.623569 | -3.351347 | -0.961875 |
| 78.H | -3.061265 | -5.031542 | -0.603507 |
| 79.H | 4.795264  | -3.917146 | -0.514476 |
| 80.H | 2.550688  | 3.446536  | -0.285428 |
| 81.H | 3.175524  | 5.076699  | 0.020325  |
| 82.H | -2.377052 | 4.806239  | -0.070127 |
| 83.H | -4.981740 | -2.579167 | 0.002287  |
| 84.H | -5.305183 | -4.298596 | 0.259555  |
| 85.H | -1.553990 | -4.344178 | 0.035565  |
| 86.H | 5.323826  | -2.443243 | 0.328628  |
| 87.H | 0.690424  | -4.053874 | 0.272214  |
| 88.H | 5.418807  | 0.651587  | 0.445235  |
| 89.H | -1.131956 | 6.764276  | 0.794522  |
| 90.H | 0.936340  | 5.756239  | 0.948056  |
| 91.H | 4.452518  | 2.083302  | 0.863924  |

|        |           |           |           |
|--------|-----------|-----------|-----------|
| 92.H   | -3.280879 | 0.983820  | 0.962676  |
| 93.H   | -4.250127 | -0.466870 | 1.112062  |
| 94.H   | -2.773916 | 6.735083  | 1.465501  |
| 95.H   | 2.683992  | 4.047142  | 1.376897  |
| 96.H   | -5.463723 | -3.158978 | 1.608716  |
| 97.H   | -4.084194 | 4.601929  | 1.670178  |
| 98.H   | -3.284626 | 3.021084  | 1.520755  |
| 99.H   | 5.895473  | 1.676114  | 1.825385  |
| 100.H  | -3.357056 | -4.480629 | 1.801772  |
| 101.H  | 3.348013  | -5.070940 | 1.879824  |
| 102.H  | -1.098236 | -5.032490 | 2.161325  |
| 103.H  | -1.398522 | 6.242336  | 2.469215  |
| 104.H  | -0.094019 | -2.755976 | 1.924671  |
| 105.H  | 5.535753  | -1.809943 | 2.497678  |
| 106.H  | 1.170481  | 2.459640  | 2.236730  |
| 107.H  | -0.972776 | 1.087152  | 2.448379  |
| 108.H  | 3.938775  | -3.717958 | 2.875782  |
| 109.H  | 2.201855  | -4.094622 | 2.832615  |
| 110.H  | -2.888935 | 4.092514  | 2.874204  |
| 111.H  | -4.684110 | -1.507070 | 2.884461  |
| 112.H  | 1.265848  | 4.799425  | 3.179209  |
| 113.H  | 0.095699  | -4.755055 | 3.441307  |
| 114.H  | 5.935458  | -0.603584 | 3.738364  |
| 115.H  | 2.793691  | 2.152061  | 3.534678  |
| 116.H  | -1.632020 | -4.658551 | 3.810593  |
| 117.H  | -1.614319 | 2.326542  | 3.527933  |
| 118.H  | -3.285708 | 0.473097  | 3.457984  |
| 119.H  | -0.341012 | 4.571714  | 3.896988  |
| 120.H  | -4.326809 | -3.749335 | 3.925232  |
| 121.H  | 4.565588  | -1.712185 | 3.987067  |
| 122.H  | -0.212525 | -1.057731 | 3.747120  |
| 123.H  | -0.174610 | 1.403781  | 3.991271  |
| 124.H  | 0.704240  | -2.489133 | 4.219478  |
| 125.H  | 1.024173  | 3.589980  | 4.455174  |
| 126.H  | 4.255810  | 1.683414  | 4.429486  |
| 127.H  | 2.764001  | 0.720342  | 4.588233  |
| 128.H  | -2.450688 | -0.450902 | 4.714927  |
| 129.H  | -0.949346 | -2.269022 | 4.830393  |
| 130.H  | -3.100326 | -3.064366 | 5.009729  |
| 131.H  | -4.185076 | -0.115659 | 4.871965  |
| 132.H  | -4.786182 | -2.533341 | 5.134549  |
| 133.As | 2.093647  | -0.747726 | 1.330622  |
| 134.N  | -0.010258 | -0.700060 | -2.307921 |
| 135.N  | -2.500559 | 0.588225  | -1.606673 |
| 136.N  | -0.629596 | 2.328911  | -0.259378 |
| 137.N  | -2.118083 | -0.823386 | 0.947199  |
| 138.Si | 1.329701  | -0.747078 | -3.481013 |
| 139.Si | 2.871709  | -2.905024 | 0.727479  |
| 140.Si | -0.374938 | 3.697532  | 0.848128  |
| 141.Si | -2.481908 | -2.208913 | 2.019969  |
| 142.Si | 3.969943  | 0.192633  | 2.449274  |
| 143.U  | -0.303083 | 0.071070  | -0.170170 |

Energy: -759.22758577 eV

**Table S7. Final Coordinates and Single Point Energy of 4USb After Geometry Optimisation**

|      |           |           |           |
|------|-----------|-----------|-----------|
| 1.C  | -3.244307 | -2.336105 | -5.081214 |
| 2.C  | -3.448843 | 1.298830  | -5.032095 |
| 3.C  | -0.228858 | -0.418812 | -5.137406 |
| 4.C  | 3.849362  | -3.172826 | -3.745576 |
| 5.C  | -3.586801 | 0.845029  | -3.560768 |
| 6.C  | -2.690056 | -2.278518 | -3.640809 |
| 7.C  | -0.536630 | -0.024652 | -3.679084 |
| 8.C  | -0.151121 | 1.446296  | -3.437009 |
| 9.C  | -5.068859 | 0.508975  | -3.282043 |
| 10.C | 0.975916  | -3.630500 | -2.956826 |
| 11.C | -3.564337 | -3.144662 | -2.712593 |
| 12.C | 2.290309  | 4.017997  | -1.795147 |
| 13.C | 6.165025  | -1.545515 | -1.505033 |
| 14.C | 0.288358  | 5.531119  | -1.473752 |
| 15.C | 3.232920  | -4.507400 | -1.040568 |
| 16.C | 1.439327  | 4.785992  | -0.766705 |
| 17.C | 5.521368  | 1.272315  | -0.555496 |
| 18.C | -3.330200 | -0.705654 | -0.473985 |
| 19.C | -1.622632 | 2.996072  | -0.055794 |
| 20.C | -3.788412 | 0.593121  | 0.176719  |
| 21.C | -0.855810 | -3.621094 | 0.414901  |
| 22.C | -2.623101 | 2.591418  | 1.021288  |
| 23.C | 5.351775  | -1.104465 | 1.396171  |
| 24.C | 2.466531  | 2.812434  | 1.385868  |
| 25.C | 0.121960  | -3.461131 | 1.592393  |
| 26.C | 3.578333  | 3.797569  | 1.800363  |
| 27.C | 0.772199  | 6.300840  | 2.129172  |
| 28.C | 0.093434  | 4.916356  | 2.032267  |
| 29.C | 0.469497  | -4.843273 | 2.183187  |
| 30.C | -2.825526 | 0.591319  | 2.451834  |
| 31.C | 2.230002  | 1.782057  | 2.501739  |
| 32.C | -3.141335 | -3.294762 | 3.096140  |
| 33.C | -1.425024 | 0.350902  | 3.004042  |
| 34.C | -0.070011 | 4.325907  | 3.446811  |
| 35.C | 2.416958  | -1.953178 | 3.522429  |
| 36.C | -1.977235 | -2.754729 | 3.950638  |
| 37.C | 1.043526  | -2.073906 | 4.204967  |
| 38.C | -1.676427 | -3.742702 | 5.099695  |
| 39.C | 0.857034  | -0.955888 | 5.249904  |
| 40.H | -2.605565 | -1.811601 | -5.806177 |
| 41.H | -3.695529 | 0.487940  | -5.733797 |
| 42.H | -0.858090 | 0.126271  | -5.856810 |
| 43.H | -3.330296 | -3.384334 | -5.417618 |
| 44.H | 0.821323  | -0.185298 | -5.380267 |
| 45.H | -2.437356 | 1.650837  | -5.274975 |
| 46.H | -4.144213 | 2.130261  | -5.241123 |
| 47.H | -4.251659 | -1.894375 | -5.146821 |
| 48.H | -0.375202 | -1.492945 | -5.318324 |
| 49.H | 3.711538  | -4.123970 | -4.288636 |
| 50.H | 3.632506  | -2.349630 | -4.442637 |
| 51.H | -0.763245 | 2.137659  | -4.034568 |
| 52.H | -5.400842 | -0.365338 | -3.862462 |
| 53.H | 0.714250  | -2.976788 | -3.801283 |
| 54.H | -1.691918 | -2.755863 | -3.657164 |

|       |           |           |           |
|-------|-----------|-----------|-----------|
| 55.H  | 0.903101  | 1.616038  | -3.704230 |
| 56.H  | -5.715824 | 1.353380  | -3.576581 |
| 57.H  | 4.906189  | -3.103298 | -3.454789 |
| 58.H  | -3.624306 | -4.175781 | -3.099077 |
| 59.H  | 1.015994  | -4.664666 | -3.337080 |
| 60.H  | -3.324806 | 1.721548  | -2.934745 |
| 61.H  | 0.149272  | -0.633581 | -3.052503 |
| 62.H  | 6.066142  | -1.258399 | -2.561019 |
| 63.H  | -4.597636 | -2.768621 | -2.649947 |
| 64.H  | 2.574369  | 4.674024  | -2.635923 |
| 65.H  | -0.256923 | 1.762272  | -2.384216 |
| 66.H  | -5.277861 | 0.296986  | -2.224834 |
| 67.H  | 0.166635  | -3.573463 | -2.218548 |
| 68.H  | 1.742989  | 3.162888  | -2.215359 |
| 69.H  | 0.684442  | 6.243207  | -2.216841 |
| 70.H  | -0.367419 | 4.834126  | -2.017201 |
| 71.H  | -3.161097 | -3.198797 | -1.693239 |
| 72.H  | 5.996778  | -2.628438 | -1.425468 |
| 73.H  | 5.384993  | 1.630079  | -1.586512 |
| 74.H  | 7.204441  | -1.346479 | -1.194530 |
| 75.H  | 3.168499  | -5.499514 | -1.519970 |
| 76.H  | 3.219579  | 3.626134  | -1.359379 |
| 77.H  | -4.150181 | -1.096143 | -1.095976 |
| 78.H  | 4.273817  | -4.355900 | -0.717353 |
| 79.H  | -0.339475 | 6.105334  | -0.775233 |
| 80.H  | -1.980248 | 2.623662  | -1.034472 |
| 81.H  | -3.964496 | 1.334019  | -0.614193 |
| 82.H  | 2.089702  | 5.557649  | -0.311147 |
| 83.H  | 6.588105  | 1.375097  | -0.294657 |
| 84.H  | -0.455881 | -4.333231 | -0.323562 |
| 85.H  | 2.602951  | -4.520001 | -0.138474 |
| 86.H  | -1.624348 | 4.093245  | -0.152159 |
| 87.H  | -1.048097 | -2.680304 | -0.128733 |
| 88.H  | 4.949379  | 1.933111  | 0.110526  |
| 89.H  | -3.172547 | -1.466944 | 0.309860  |
| 90.H  | 2.829611  | 2.253654  | 0.502394  |
| 91.H  | -4.734607 | 0.468565  | 0.738086  |
| 92.H  | -1.833241 | -4.005312 | 0.736750  |
| 93.H  | -3.621744 | 3.038951  | 0.856782  |
| 94.H  | 3.831448  | 4.508799  | 1.001497  |
| 95.H  | 0.794624  | 6.829518  | 1.166109  |
| 96.H  | 1.055323  | -3.030530 | 1.179155  |
| 97.H  | 6.422578  | -0.968274 | 1.625187  |
| 98.H  | 5.105201  | -2.166935 | 1.537570  |
| 99.H  | 0.903075  | -5.500699 | 1.411232  |
| 100.H | -0.926415 | 5.099855  | 1.641381  |
| 101.H | 4.502392  | 3.257332  | 2.065256  |
| 102.H | -2.252618 | 2.947334  | 1.990945  |
| 103.H | 4.771035  | -0.529501 | 2.131233  |
| 104.H | -0.425248 | -5.353146 | 2.573705  |
| 105.H | 1.481703  | 1.017347  | 2.236627  |
| 106.H | 1.810161  | 6.223939  | 2.488560  |
| 107.H | 3.285200  | 4.383109  | 2.685610  |
| 108.H | 0.231249  | 6.944249  | 2.844343  |
| 109.H | -2.901331 | -4.281760 | 2.672677  |



|        |           |           |           |
|--------|-----------|-----------|-----------|
| 110.H  | -3.355921 | -0.369181 | 2.422525  |
| 111.H  | -3.396041 | -2.632386 | 2.255622  |
| 112.H  | 3.160099  | 1.242775  | 2.738075  |
| 113.H  | 2.664546  | -2.845034 | 2.930034  |
| 114.H  | 1.197227  | -4.777732 | 3.004671  |
| 115.H  | -3.414432 | 1.285591  | 3.081815  |
| 116.H  | 2.458166  | -1.094099 | 2.838329  |
| 117.H  | -0.877584 | 1.308713  | 3.029963  |
| 118.H  | 1.885589  | 2.255814  | 3.431343  |
| 119.H  | -0.534370 | 3.329284  | 3.442030  |
| 120.H  | -4.051410 | -3.420250 | 3.707470  |
| 121.H  | 0.902735  | 4.228134  | 3.952490  |
| 122.H  | -0.695314 | 4.980631  | 4.077453  |
| 123.H  | -1.506534 | 0.032638  | 4.055699  |
| 124.H  | 3.218605  | -1.821022 | 4.268708  |
| 125.H  | -2.339541 | -1.826489 | 4.432167  |
| 126.H  | -1.274001 | -4.697378 | 4.726650  |
| 127.H  | 1.029197  | -3.036803 | 4.749601  |
| 128.H  | 0.871438  | 0.037871  | 4.777936  |
| 129.H  | -2.599277 | -3.977305 | 5.657544  |
| 130.H  | 1.673796  | -0.973262 | 5.991162  |
| 131.H  | -0.952509 | -3.339076 | 5.821289  |
| 132.H  | -0.089005 | -1.048459 | 5.805201  |
| 133.N  | -2.077509 | -0.477550 | -1.238190 |
| 134.N  | -0.278777 | 2.449487  | 0.270121  |
| 135.N  | -2.714274 | 1.108269  | 1.062919  |
| 136.N  | -0.717445 | -0.633508 | 2.147758  |
| 137.Sb | 2.500137  | -0.823138 | -1.085005 |
| 138.Si | -2.277280 | -0.492218 | -3.013755 |
| 139.Si | 2.672230  | -3.147906 | -2.250330 |
| 140.Si | 4.998531  | -0.545674 | -0.385434 |
| 141.Si | 0.897808  | 3.703226  | 0.737330  |
| 142.Si | -0.406498 | -2.201927 | 2.941028  |
| 143.U  | -0.331502 | 0.190551  | 0.071303  |

Energy: -758.12643911 eV

**Table S8. Final Coordinates and Single Point Energy of 3ThP After Geometry Optimisation**

|      |           |           |           |
|------|-----------|-----------|-----------|
| 1.C  | 0.203152  | -0.610879 | -3.760435 |
| 2.C  | 3.514651  | 1.514320  | -3.287191 |
| 3.C  | 1.492316  | -1.084892 | -3.094325 |
| 4.C  | -2.032947 | 0.221280  | -3.112571 |
| 5.C  | -1.516757 | 5.191439  | -2.754661 |
| 6.C  | 4.873890  | -1.709904 | -2.640999 |
| 7.C  | -1.665076 | 1.659813  | -2.733962 |
| 8.C  | -1.392488 | -2.132084 | -2.706349 |
| 9.C  | 0.812384  | 4.491973  | -2.116012 |
| 10.C | 6.064993  | 0.146557  | -1.442212 |
| 11.C | -0.589511 | 4.831134  | -1.570763 |
| 12.C | 4.767120  | -0.691814 | -1.483996 |
| 13.C | -2.379018 | -2.307575 | -1.548116 |
| 14.C | -0.482810 | 6.065502  | -0.645661 |
| 15.C | -4.781147 | -0.325375 | -0.162728 |
| 16.C | -3.118079 | 3.689263  | -0.160172 |
| 17.C | 4.625157  | -1.465355 | -0.160010 |
| 18.C | 3.146207  | 1.687834  | -0.259192 |

|      |           |           |           |
|------|-----------|-----------|-----------|
| 19.C | -5.194247 | -3.354101 | 0.866805  |
| 20.C | 1.028943  | -3.481618 | 0.769946  |
| 21.C | -0.329085 | 3.159159  | 1.061876  |
| 22.C | -2.891034 | -3.827837 | 1.739446  |
| 23.C | -3.993478 | -2.755092 | 1.635286  |
| 24.C | -2.682817 | 0.112660  | 1.970169  |
| 25.C | 3.283681  | -3.253354 | 2.838399  |
| 26.C | -4.461092 | -2.384036 | 3.061182  |
| 27.C | 0.448914  | -3.564451 | 3.821946  |
| 28.C | 1.504916  | 2.136186  | 4.338909  |
| 29.C | -0.464542 | -0.000629 | 5.308312  |
| 30.C | 2.540293  | -0.524630 | 5.450709  |
| 31.H | -0.012010 | -1.170475 | -4.692999 |
| 32.H | 3.724423  | 0.913551  | -4.185176 |
| 33.H | -2.312713 | 0.165250  | -4.182974 |
| 34.H | 0.318451  | 0.450153  | -4.018589 |
| 35.H | 2.312280  | -0.910550 | -3.811630 |
| 36.H | 4.968129  | -1.220451 | -3.623045 |
| 37.H | -1.119628 | 6.072719  | -3.289664 |
| 38.H | -1.596157 | 4.375495  | -3.487532 |
| 39.H | 2.635971  | 2.142562  | -3.498366 |
| 40.H | -1.839207 | -2.475445 | -3.660257 |
| 41.H | -0.947294 | 2.058201  | -3.476129 |
| 42.H | 4.372628  | 2.190275  | -3.144453 |
| 43.H | 1.465771  | -2.181485 | -2.956675 |
| 44.H | 1.214784  | 5.337276  | -2.702443 |
| 45.H | 5.769315  | -2.343306 | -2.506056 |
| 46.H | 0.795168  | 3.608467  | -2.770525 |
| 47.H | -2.589093 | 2.252892  | -2.871407 |
| 48.H | -2.534512 | 5.443489  | -2.420377 |
| 49.H | 4.003859  | -2.382117 | -2.676835 |
| 50.H | 6.234552  | 0.699356  | -2.379260 |
| 51.H | -2.899851 | -0.085056 | -2.516118 |
| 52.H | -0.500642 | -2.751383 | -2.526059 |
| 53.H | -3.397266 | -2.061902 | -1.906131 |
| 54.H | 6.936615  | -0.515499 | -1.290574 |
| 55.H | -0.094952 | 6.929925  | -1.214105 |
| 56.H | 1.530808  | 4.289542  | -1.308160 |
| 57.H | -2.407327 | -3.387085 | -1.307136 |
| 58.H | -3.760439 | 3.610672  | -1.050541 |
| 59.H | -5.213820 | -0.929126 | -0.974152 |
| 60.H | 6.062849  | 0.874228  | -0.616027 |
| 61.H | -4.457276 | 0.637290  | -0.586546 |
| 62.H | -1.460008 | 6.361322  | -0.232551 |
| 63.H | 2.380154  | 2.457081  | -0.445468 |
| 64.H | 4.103293  | 2.220922  | -0.149411 |
| 65.H | 5.493633  | -2.131371 | -0.006880 |
| 66.H | -4.933758 | -3.632299 | -0.166631 |
| 67.H | 3.721009  | -2.090017 | -0.157682 |
| 68.H | 0.202564  | 5.894758  | 0.198435  |
| 69.H | -3.252058 | 4.701562  | 0.253065  |
| 70.H | 1.625850  | -3.019898 | -0.034653 |
| 71.H | -5.595199 | -0.115016 | 0.548806  |
| 72.H | -3.501296 | 2.974081  | 0.583353  |
| 73.H | 4.560645  | -0.794850 | 0.709752  |

|        |           |           |           |
|--------|-----------|-----------|-----------|
| 74.H   | -6.045358 | -2.658501 | 0.821749  |
| 75.H   | -0.039125 | -3.329744 | 0.545333  |
| 76.H   | -2.575090 | -4.188766 | 0.749827  |
| 77.H   | 1.227422  | -4.564770 | 0.738644  |
| 78.H   | 2.924971  | 1.192634  | 0.700800  |
| 79.H   | 0.757756  | 3.272484  | 0.933419  |
| 80.H   | -5.544933 | -4.271387 | 1.374062  |
| 81.H   | -2.483996 | 1.073178  | 1.464295  |
| 82.H   | -0.497000 | 2.205768  | 1.596630  |
| 83.H   | -0.652051 | 3.939558  | 1.768488  |
| 84.H   | -3.260044 | -4.700066 | 2.308396  |
| 85.H   | 3.985812  | -2.887565 | 2.077202  |
| 86.H   | -1.996470 | -3.451143 | 2.252109  |
| 87.H   | -1.770027 | -0.200466 | 2.501783  |
| 88.H   | -3.455049 | 0.326815  | 2.723941  |
| 89.H   | 3.356644  | -4.353813 | 2.873255  |
| 90.H   | -5.232307 | -1.597029 | 3.058775  |
| 91.H   | -4.899375 | -3.268425 | 3.558305  |
| 92.H   | 3.612485  | -2.863610 | 3.812996  |
| 93.H   | -3.627232 | -2.034116 | 3.688332  |
| 94.H   | 0.525407  | -4.661800 | 3.748870  |
| 95.H   | -0.613572 | -3.292790 | 3.766576  |
| 96.H   | 0.745790  | 2.668974  | 3.748247  |
| 97.H   | 2.489020  | 2.356982  | 3.900059  |
| 98.H   | 0.813041  | -3.274867 | 4.818892  |
| 99.H   | -1.297797 | 0.514052  | 4.806913  |
| 100.H  | 3.535954  | -0.370238 | 5.010436  |
| 101.H  | 1.486296  | 2.548846  | 5.361024  |
| 102.H  | -0.720959 | -1.068394 | 5.374950  |
| 103.H  | 2.390145  | -1.606663 | 5.576716  |
| 104.H  | -0.392358 | 0.394930  | 6.335335  |
| 105.H  | 2.535202  | -0.070620 | 6.455561  |
| 106.N  | -0.929544 | -0.726675 | -2.808653 |
| 107.N  | 1.693805  | -0.385088 | -1.806733 |
| 108.N  | -1.125731 | 1.776652  | -1.365410 |
| 109.N  | -1.994736 | -1.486799 | -0.389386 |
| 110.P  | 1.194160  | -0.514500 | 2.270482  |
| 111.Si | 3.237927  | 0.475557  | -1.710909 |
| 112.Si | -1.296191 | 3.328538  | -0.568380 |
| 113.Si | -3.323368 | -1.168627 | 0.730151  |
| 114.Si | 1.494358  | -2.736768 | 2.463671  |
| 115.Si | 1.178263  | 0.266429  | 4.385650  |
| 116.Th | -0.125446 | -0.078710 | -0.366425 |

Energy: -616.01263751 eV

**Table S9. Final Coordinates and Single Point Energy of 3ThAs After Geometry Optimisation**

|     |           |           |           |
|-----|-----------|-----------|-----------|
| 1.C | -0.325059 | -0.982179 | -6.060972 |
| 2.C | -2.714977 | -0.520184 | -5.456470 |
| 3.C | -1.252098 | -0.390867 | -4.973478 |
| 4.C | -0.916919 | 1.102770  | -4.792446 |
| 5.C | -1.621319 | -3.130165 | -3.570292 |
| 6.C | 0.878231  | -1.410030 | -2.933585 |
| 7.C | 4.548414  | -1.234649 | -2.260227 |
| 8.C | -3.160256 | -0.408188 | -1.918676 |
| 9.C | 4.628645  | 1.727123  | -1.494570 |

|      |           |           |           |
|------|-----------|-----------|-----------|
| 10.C | -1.589986 | 4.426217  | -1.602389 |
| 11.C | 0.912900  | 2.651305  | -1.668099 |
| 12.C | -3.798207 | -0.621633 | -0.545974 |
| 13.C | 1.231952  | 5.869152  | -0.213949 |
| 14.C | 6.090433  | -0.338688 | 0.212249  |
| 15.C | -0.320975 | -3.819094 | 0.196389  |
| 16.C | -3.508827 | 1.636816  | 0.411647  |
| 17.C | 0.569760  | 4.757802  | 0.630909  |
| 18.C | -2.396192 | 2.493762  | 1.013770  |
| 19.C | 1.659700  | 4.015954  | 1.426266  |
| 20.C | -0.420202 | 5.403117  | 1.625858  |
| 21.C | -2.957307 | -3.917570 | 1.793301  |
| 22.C | -3.386699 | -0.343073 | 1.882406  |
| 23.C | -2.046129 | -0.669538 | 2.555626  |
| 24.C | 4.214605  | 1.742822  | 2.870268  |
| 25.C | 1.264540  | -3.680120 | 3.128902  |
| 26.C | -0.488223 | -5.455841 | 3.409067  |
| 27.C | -0.246124 | -3.933031 | 3.306093  |
| 28.C | 4.209150  | -1.218472 | 3.517604  |
| 29.C | 1.581698  | 0.393799  | 3.690264  |
| 30.C | -0.718943 | -3.268121 | 4.617334  |
| 31.H | -0.489651 | -0.462026 | -7.021771 |
| 32.H | -2.839733 | -0.004818 | -6.425880 |
| 33.H | -0.515890 | -2.052594 | -6.235119 |
| 34.H | 0.739371  | -0.867754 | -5.805544 |
| 35.H | -3.011850 | -1.569492 | -5.604667 |
| 36.H | -1.085161 | 1.654642  | -5.734563 |
| 37.H | -3.427445 | -0.064917 | -4.752931 |
| 38.H | -1.282957 | -3.544730 | -4.532896 |
| 39.H | 0.136878  | 1.255472  | -4.514706 |
| 40.H | -1.540579 | 1.570448  | -4.016566 |
| 41.H | 1.407570  | -2.001811 | -3.695925 |
| 42.H | -2.721251 | -3.177620 | -3.563004 |
| 43.H | -1.257324 | -3.800382 | -2.777571 |
| 44.H | 5.465845  | -1.063369 | -2.847633 |
| 45.H | 1.341402  | -0.410347 | -2.934262 |
| 46.H | 3.689013  | -1.101391 | -2.931852 |
| 47.H | -3.670492 | -1.114609 | -2.599720 |
| 48.H | -1.073211 | 5.172159  | -2.226727 |
| 49.H | 5.576693  | 1.844147  | -2.046494 |
| 50.H | 0.392550  | 2.065174  | -2.443134 |
| 51.H | -3.420203 | 0.598296  | -2.296995 |
| 52.H | 3.805850  | 1.945210  | -2.191035 |
| 53.H | -2.109249 | 3.732891  | -2.281802 |
| 54.H | 1.524127  | 3.395685  | -2.200265 |
| 55.H | 1.125703  | -1.891715 | -1.969994 |
| 56.H | 4.550239  | -2.280677 | -1.920076 |
| 57.H | -2.354664 | 4.964924  | -1.022480 |
| 58.H | 1.618923  | 1.993107  | -1.128182 |
| 59.H | 1.963504  | 5.464376  | -0.930579 |
| 60.H | 4.604475  | 2.485582  | -0.698174 |
| 61.H | 0.493786  | 6.458161  | -0.779915 |
| 62.H | 6.959519  | -0.236683 | -0.459092 |
| 63.H | -4.888518 | -0.425555 | -0.590206 |
| 64.H | -3.600761 | 1.895167  | -0.652138 |

|        |           |           |           |
|--------|-----------|-----------|-----------|
| 65.H   | -0.894569 | -3.523882 | -0.694863 |
| 66.H   | -3.654209 | -1.671557 | -0.262386 |
| 67.H   | 1.776522  | 6.570901  | 0.443264  |
| 68.H   | -0.234741 | -4.915949 | 0.177656  |
| 69.H   | 0.698387  | -3.408567 | 0.109889  |
| 70.H   | 6.113875  | -1.347834 | 0.647701  |
| 71.H   | 6.214905  | 0.388602  | 1.026444  |
| 72.H   | -4.486762 | 1.829813  | 0.896802  |
| 73.H   | 2.405033  | 3.551965  | 0.763928  |
| 74.H   | -2.687802 | 3.551881  | 0.898694  |
| 75.H   | -1.221969 | 5.959950  | 1.116053  |
| 76.H   | -3.521316 | -3.610555 | 0.898980  |
| 77.H   | -2.941268 | -5.018511 | 1.804194  |
| 78.H   | 2.194772  | 4.713366  | 2.095194  |
| 79.H   | -3.989586 | -1.257524 | 1.802619  |
| 80.H   | 0.110011  | 6.119957  | 2.278859  |
| 81.H   | -2.346742 | 2.323350  | 2.105959  |
| 82.H   | 1.233351  | 3.216764  | 2.048762  |
| 83.H   | 3.796403  | 2.586512  | 2.306077  |
| 84.H   | -0.887819 | 4.652677  | 2.280584  |
| 85.H   | 1.678329  | -4.248773 | 2.283504  |
| 86.H   | -0.213138 | -5.985008 | 2.482979  |
| 87.H   | -3.961921 | 0.381941  | 2.483352  |
| 88.H   | 5.253357  | 1.592616  | 2.541840  |
| 89.H   | -3.528218 | -3.594004 | 2.678182  |
| 90.H   | -1.549147 | 0.288355  | 2.822137  |
| 91.H   | 5.170426  | -1.350947 | 2.999165  |
| 92.H   | 1.483694  | -2.620276 | 2.942359  |
| 93.H   | 3.689041  | -2.185903 | 3.510551  |
| 94.H   | 1.054838  | 1.308382  | 3.376344  |
| 95.H   | -1.538040 | -5.695529 | 3.636141  |
| 96.H   | -2.234545 | -1.154198 | 3.527990  |
| 97.H   | 0.894055  | -0.455339 | 3.563241  |
| 98.H   | 4.245314  | 2.028857  | 3.935884  |
| 99.H   | 1.815830  | -3.986727 | 4.035433  |
| 100.H  | 0.128846  | -5.880508 | 4.221123  |
| 101.H  | 4.425238  | -0.950113 | 4.565946  |
| 102.H  | -0.485206 | -2.193569 | 4.638164  |
| 103.H  | 1.806248  | 0.491503  | 4.764839  |
| 104.H  | -1.802288 | -3.387809 | 4.779759  |
| 105.H  | -0.208647 | -3.728597 | 5.482524  |
| 106.As | 2.538455  | -0.454344 | 0.482861  |
| 107.N  | -1.698496 | -0.610230 | -1.895921 |
| 108.N  | -1.109239 | 2.178078  | 0.363418  |
| 109.N  | -3.150474 | 0.199815  | 0.508691  |
| 110.N  | -1.179757 | -1.465347 | 1.666841  |
| 111.Si | -0.979834 | -1.357495 | -3.313074 |
| 112.Si | 4.499733  | -0.036139 | -0.786010 |
| 113.Si | -0.335779 | 3.492436  | -0.514876 |
| 114.Si | -1.182245 | -3.220004 | 1.771365  |
| 115.Si | 3.183339  | 0.150954  | 2.686024  |
| 116.Th | -0.466565 | -0.027778 | 0.007073  |

Energy: -615.23023502 eV

**Table S10. Final Coordinates and Single Point Energy of 4ThP After Geometry Optimisation**

|      |           |           |           |
|------|-----------|-----------|-----------|
| 1.C  | 1.114501  | 1.757731  | -4.950730 |
| 2.C  | 1.880746  | 4.125949  | -4.552819 |
| 3.C  | -1.762290 | 4.218256  | -3.993999 |
| 4.C  | -0.001145 | -2.864184 | -3.931035 |
| 5.C  | 1.528070  | 2.782848  | -3.876110 |
| 6.C  | -1.892945 | -4.471584 | -3.471415 |
| 7.C  | -0.477990 | -4.029200 | -3.046289 |
| 8.C  | -1.402433 | 0.906700  | -2.913165 |
| 9.C  | -0.898954 | 4.384729  | -2.724330 |
| 10.C | 3.044200  | -0.411212 | -2.551367 |
| 11.C | -2.798356 | 0.921293  | -2.300131 |
| 12.C | 2.531938  | -4.424128 | -1.831660 |
| 13.C | -1.784958 | 4.839404  | -1.548727 |
| 14.C | -3.155073 | -1.364047 | -1.458174 |
| 15.C | 5.027399  | 1.472507  | -1.162872 |
| 16.C | 2.397200  | 4.590106  | -1.056925 |
| 17.C | -0.365796 | -6.571583 | -0.663738 |
| 18.C | 5.293944  | -1.556695 | -0.859814 |
| 19.C | 1.676200  | -3.615640 | -0.834650 |
| 20.C | 1.465117  | 3.380297  | -0.851202 |
| 21.C | -1.040092 | -5.237468 | -0.275385 |
| 22.C | -2.450687 | -2.319619 | -0.501894 |
| 23.C | -3.721031 | 0.571594  | -0.044432 |
| 24.C | 0.752161  | 3.514452  | 0.505188  |
| 25.C | 2.081074  | -3.967495 | 0.610154  |
| 26.C | -2.934706 | 1.516046  | 0.858797  |
| 27.C | -1.194669 | -5.125569 | 1.253420  |
| 28.C | 5.672139  | 0.020960  | 2.376117  |
| 29.C | 3.715387  | 2.277511  | 3.009945  |
| 30.C | -0.467038 | -1.868175 | 3.206580  |
| 31.C | -3.948780 | -1.441588 | 3.497795  |
| 32.C | -2.684415 | 3.476881  | 3.695591  |
| 33.C | -3.708656 | 0.057257  | 3.766192  |
| 34.C | -0.510907 | -0.465696 | 3.840720  |
| 35.C | -0.255286 | 2.916620  | 4.093513  |
| 36.C | 3.268647  | -0.545586 | 4.104886  |
| 37.C | -1.697255 | 2.381581  | 4.150090  |
| 38.C | -4.130024 | 0.401711  | 5.211132  |
| 39.C | -0.417919 | -0.588286 | 5.375879  |
| 40.H | 1.911459  | 1.647085  | -5.705693 |
| 41.H | 0.207889  | 2.073317  | -5.490752 |
| 42.H | 2.690559  | 3.986349  | -5.289258 |
| 43.H | 1.019336  | 4.542216  | -5.098073 |
| 44.H | 0.048460  | -3.159717 | -4.993446 |
| 45.H | -1.178211 | 3.899404  | -4.869172 |
| 46.H | -1.920926 | -4.710884 | -4.548464 |
| 47.H | 0.923447  | 0.762780  | -4.527580 |
| 48.H | -2.252306 | 5.171774  | -4.255900 |
| 49.H | 2.216578  | 4.891378  | -3.839888 |
| 50.H | -0.695058 | -2.011292 | -3.866464 |
| 51.H | -2.567275 | 3.481416  | -3.846153 |
| 52.H | -1.418758 | 1.510457  | -3.833332 |
| 53.H | 2.459447  | 2.398433  | -3.418293 |
| 54.H | 0.993080  | -2.490395 | -3.646799 |

|       |           |           |           |
|-------|-----------|-----------|-----------|
| 55.H  | 0.194470  | -4.885022 | -3.246474 |
| 56.H  | -2.639187 | -3.678277 | -3.304573 |
| 57.H  | 3.655433  | -0.139206 | -3.425960 |
| 58.H  | -1.170501 | -0.119526 | -3.251404 |
| 59.H  | -0.197997 | 5.217352  | -2.933350 |
| 60.H  | -3.576042 | 0.614628  | -3.026271 |
| 61.H  | -2.235226 | -5.365920 | -2.930765 |
| 62.H  | 2.384069  | -4.109541 | -2.874224 |
| 63.H  | 2.765806  | -1.468313 | -2.663901 |
| 64.H  | 2.125549  | 0.192033  | -2.594325 |
| 65.H  | -2.788338 | -1.555821 | -2.475371 |
| 66.H  | 5.717581  | 1.373907  | -2.017349 |
| 67.H  | -3.025195 | 1.945875  | -1.977436 |
| 68.H  | -2.436457 | 5.677364  | -1.852216 |
| 69.H  | 2.309818  | -5.501103 | -1.778773 |
| 70.H  | -0.324186 | -6.717784 | -1.753512 |
| 71.H  | 3.067049  | 4.462600  | -1.917839 |
| 72.H  | 5.841892  | -1.629629 | -1.814896 |
| 73.H  | 3.604034  | -4.305999 | -1.603788 |
| 74.H  | -4.251870 | -1.518423 | -1.458611 |
| 75.H  | 4.371889  | 2.334521  | -1.352702 |
| 76.H  | 1.830274  | 5.522589  | -1.208890 |
| 77.H  | -2.444948 | 4.031233  | -1.194488 |
| 78.H  | 1.934334  | -2.547110 | -0.968298 |
| 79.H  | -1.195315 | 5.179657  | -0.687543 |
| 80.H  | -2.063956 | -5.280041 | -0.693118 |
| 81.H  | 4.790654  | -2.518152 | -0.682808 |
| 82.H  | -2.803711 | -3.338750 | -0.727061 |
| 83.H  | -0.918516 | -7.427237 | -0.239214 |
| 84.H  | 2.110889  | 2.483313  | -0.764190 |
| 85.H  | 0.665177  | -6.632864 | -0.282642 |
| 86.H  | -4.604252 | 1.064145  | -0.494617 |
| 87.H  | 5.630573  | 1.705816  | -0.273492 |
| 88.H  | 3.034294  | 4.740265  | -0.169524 |
| 89.H  | 6.032012  | -1.408715 | -0.059435 |
| 90.H  | -2.574827 | 2.372230  | 0.260988  |
| 91.H  | -4.079195 | -0.270322 | 0.562231  |
| 92.H  | -2.804258 | -2.115996 | 0.525958  |
| 93.H  | 0.259317  | 4.491513  | 0.612113  |
| 94.H  | -0.038169 | 2.762756  | 0.683009  |
| 95.H  | 3.146316  | -3.739148 | 0.777128  |
| 96.H  | 1.935431  | -5.038898 | 0.817187  |
| 97.H  | 1.513151  | -3.392022 | 1.352876  |
| 98.H  | 1.477998  | 3.419478  | 1.325867  |
| 99.H  | -1.780323 | -5.972801 | 1.649437  |
| 100.H | 6.148309  | 0.535890  | 1.531117  |
| 101.H | -1.706824 | -4.200183 | 1.549853  |
| 102.H | -3.633478 | 1.950598  | 1.591683  |
| 103.H | -0.220826 | -5.137517 | 1.762993  |
| 104.H | 5.832587  | -1.059698 | 2.254492  |
| 105.H | 4.068693  | 2.903560  | 2.177208  |
| 106.H | -0.570100 | -1.878689 | 2.106697  |
| 107.H | -3.633025 | -1.748235 | 2.489815  |
| 108.H | -2.485389 | 3.789237  | 2.659189  |
| 109.H | 6.194550  | 0.337107  | 3.294141  |

|        |           |           |           |
|--------|-----------|-----------|-----------|
| 110.H  | -4.394949 | 0.616257  | 3.100772  |
| 111.H  | 0.053635  | 3.125642  | 3.060080  |
| 112.H  | 2.682468  | 2.576586  | 3.239782  |
| 113.H  | -5.017219 | -1.694912 | 3.604050  |
| 114.H  | 0.485343  | -2.369916 | 3.436772  |
| 115.H  | -3.734590 | 3.152439  | 3.750288  |
| 116.H  | 4.336470  | 2.503011  | 3.893109  |
| 117.H  | 0.396931  | 0.070469  | 3.499985  |
| 118.H  | -1.276085 | -2.506491 | 3.586965  |
| 119.H  | 3.323153  | -1.629108 | 3.925184  |
| 120.H  | -2.587873 | 4.376628  | 4.326405  |
| 121.H  | -3.398012 | -2.066690 | 4.217205  |
| 122.H  | 2.241187  | -0.303082 | 4.407887  |
| 123.H  | 0.471001  | 2.210759  | 4.521096  |
| 124.H  | -0.162990 | 3.860247  | 4.657954  |
| 125.H  | 3.930431  | -0.306235 | 4.953954  |
| 126.H  | -1.923196 | 2.161206  | 5.211030  |
| 127.H  | -4.118186 | 1.483171  | 5.405993  |
| 128.H  | -5.154758 | 0.043745  | 5.410396  |
| 129.H  | 0.478877  | -1.157185 | 5.671615  |
| 130.H  | -1.288119 | -1.124574 | 5.784478  |
| 131.H  | -3.472319 | -0.075291 | 5.954570  |
| 132.H  | -0.365618 | 0.390131  | 5.874058  |
| 133.N  | -0.395024 | 1.380780  | -1.927918 |
| 134.N  | -2.826710 | 0.039393  | -1.104626 |
| 135.N  | -0.967838 | -2.194826 | -0.587493 |
| 136.N  | -1.803034 | 0.796402  | 1.499736  |
| 137.P  | 2.568545  | -0.111458 | 0.768435  |
| 138.Si | 0.344976  | 2.944113  | -2.345146 |
| 139.Si | -0.218197 | -3.714120 | -1.150268 |
| 140.Si | 4.034161  | -0.136728 | -0.950863 |
| 141.Si | 3.826233  | 0.431166  | 2.576698  |
| 142.Si | -1.937913 | 0.680628  | 3.266177  |
| 143.Th | -0.266940 | -0.011323 | -0.058102 |

Energy: -760.27565310 eV

**Table S11. Final Coordinates and Single Point Energy of 4ThAs After Geometry Optimisation**

|      |           |           |           |
|------|-----------|-----------|-----------|
| 1.C  | -0.484392 | 2.326179  | -6.053062 |
| 2.C  | -2.467467 | -0.772479 | -5.614424 |
| 3.C  | 1.111173  | -0.855720 | -5.000444 |
| 4.C  | -3.705494 | 1.121117  | -4.516934 |
| 5.C  | -0.403468 | 2.350021  | -4.512323 |
| 6.C  | -2.605615 | 0.054668  | -4.317334 |
| 7.C  | 0.979607  | 2.850463  | -4.053111 |
| 8.C  | 0.424777  | -0.632199 | -3.638132 |
| 9.C  | 4.340735  | 0.179309  | -3.063600 |
| 10.C | -0.075493 | -1.975496 | -3.072179 |
| 11.C | 4.006094  | -2.818349 | -2.447618 |
| 12.C | -2.026137 | -4.697155 | -1.455049 |
| 13.C | -2.103985 | 2.148214  | -1.536400 |
| 14.C | 6.075841  | -1.142891 | -0.937807 |
| 15.C | -3.325230 | 1.522437  | -0.863892 |
| 16.C | 1.562379  | 3.449223  | -0.368203 |
| 17.C | -2.301340 | -4.764000 | 0.058826  |
| 18.C | -3.016287 | -1.570874 | -0.079068 |



|      |           |           |           |
|------|-----------|-----------|-----------|
| 19.C | 1.166066  | -4.239288 | 0.069965  |
| 20.C | -2.070743 | -6.192638 | 0.596365  |
| 21.C | -3.666876 | -0.397802 | 0.649118  |
| 22.C | 1.928194  | 3.154830  | 1.096487  |
| 23.C | 0.468844  | -3.738961 | 1.348625  |
| 24.C | 3.121396  | 4.028422  | 1.529953  |
| 25.C | -2.942175 | 1.773227  | 1.559486  |
| 26.C | 0.102541  | 5.999484  | 1.874159  |
| 27.C | -0.697308 | 4.687930  | 2.041671  |
| 28.C | 4.424497  | -2.599664 | 2.262519  |
| 29.C | 4.976320  | 0.415274  | 2.409327  |
| 30.C | 0.820492  | -4.666233 | 2.530518  |
| 31.C | -1.777160 | 1.454085  | 2.492462  |
| 32.C | -3.767635 | -3.650407 | 2.908563  |
| 33.C | -2.228324 | -3.550162 | 2.885205  |
| 34.C | -1.803462 | 4.912471  | 3.097026  |
| 35.C | 2.262404  | -0.716730 | 3.321977  |
| 36.C | -1.748847 | -2.460965 | 3.859065  |
| 37.C | 1.111983  | 2.930686  | 4.079938  |
| 38.C | 1.562724  | 4.258701  | 4.726931  |
| 39.C | 0.237615  | 2.141712  | 5.074208  |
| 40.H | -0.217511 | 3.314565  | -6.465609 |
| 41.H | 0.213960  | 1.596805  | -6.491521 |
| 42.H | -1.491370 | 2.081449  | -6.419939 |
| 43.H | -2.089058 | -0.165369 | -6.450560 |
| 44.H | -3.450085 | -1.169411 | -5.922583 |
| 45.H | 0.402155  | -1.213230 | -5.761438 |
| 46.H | -1.792235 | -1.630590 | -5.498097 |
| 47.H | -3.415177 | 1.863089  | -5.276162 |
| 48.H | 1.575744  | 0.060941  | -5.388423 |
| 49.H | 1.905945  | -1.614530 | -4.914217 |
| 50.H | -4.639604 | 0.650823  | -4.868403 |
| 51.H | 1.195013  | 3.849332  | -4.468251 |
| 52.H | 1.784846  | 2.180879  | -4.392180 |
| 53.H | -1.144886 | 3.098228  | -4.169753 |
| 54.H | 5.088474  | -0.096873 | -3.826013 |
| 55.H | -3.947672 | 1.673266  | -3.599065 |
| 56.H | -2.960452 | -0.640792 | -3.531288 |
| 57.H | -0.829891 | -2.433311 | -3.727932 |
| 58.H | 3.366655  | 0.262420  | -3.564982 |
| 59.H | 4.785510  | -3.056214 | -3.191522 |
| 60.H | 1.049256  | 2.920273  | -2.961179 |
| 61.H | 3.031881  | -2.851860 | -2.957021 |
| 62.H | 1.205350  | -0.252326 | -2.946745 |
| 63.H | 0.750379  | -2.696488 | -2.974987 |
| 64.H | 4.602913  | 1.172571  | -2.670816 |
| 65.H | -2.435595 | 2.714754  | -2.422557 |
| 66.H | -2.631960 | -5.444838 | -1.995574 |
| 67.H | -0.546450 | -1.899955 | -2.076121 |
| 68.H | 4.007678  | -3.609335 | -1.683398 |
| 69.H | 6.788713  | -1.405146 | -1.737189 |
| 70.H | -2.268898 | -3.710457 | -1.872437 |
| 71.H | -0.971519 | -4.901497 | -1.689255 |
| 72.H | -3.740726 | 0.760393  | -1.536121 |
| 73.H | -3.040620 | -1.369814 | -1.167265 |

|       |           |           |           |
|-------|-----------|-----------|-----------|
| 74.H  | 2.431199  | 3.284484  | -1.024209 |
| 75.H  | -1.676365 | 2.908400  | -0.856382 |
| 76.H  | 6.367136  | -0.161620 | -0.537016 |
| 77.H  | -4.120040 | 2.265798  | -0.662416 |
| 78.H  | 0.991727  | -3.574929 | -0.785791 |
| 79.H  | 0.752060  | 2.806411  | -0.753303 |
| 80.H  | 1.229060  | 4.487912  | -0.511810 |
| 81.H  | 6.187290  | -1.887230 | -0.137773 |
| 82.H  | -2.682586 | -6.923451 | 0.039917  |
| 83.H  | 0.830741  | -5.251512 | -0.201420 |
| 84.H  | -3.379852 | -4.555949 | 0.191091  |
| 85.H  | -3.664654 | -2.451118 | 0.063130  |
| 86.H  | 2.256956  | -4.281034 | 0.219841  |
| 87.H  | -1.019793 | -6.503482 | 0.487093  |
| 88.H  | -4.727854 | -0.272302 | 0.357605  |
| 89.H  | 3.963634  | 3.892505  | 0.831022  |
| 90.H  | 0.834085  | 5.946645  | 1.056938  |
| 91.H  | 2.292560  | 2.106599  | 1.112779  |
| 92.H  | -1.199698 | 4.500165  | 1.072061  |
| 93.H  | -2.333918 | -6.288305 | 1.660528  |
| 94.H  | -2.822922 | 2.800422  | 1.190671  |
| 95.H  | 2.875525  | 5.100778  | 1.535802  |
| 96.H  | -0.580003 | 6.837702  | 1.650693  |
| 97.H  | 5.828355  | 0.329134  | 1.719348  |
| 98.H  | 0.911359  | -2.744921 | 1.567191  |
| 99.H  | -3.637095 | -0.600192 | 1.727849  |
| 100.H | 5.314881  | -2.745408 | 1.634589  |
| 101.H | 3.708551  | -3.399052 | 2.023747  |
| 102.H | -3.920575 | 1.710124  | 2.073674  |
| 103.H | -4.140708 | -4.491361 | 2.306032  |
| 104.H | 4.579335  | 1.437031  | 2.322147  |
| 105.H | -4.247449 | -2.733873 | 2.530390  |
| 106.H | 3.486643  | 3.766792  | 2.532628  |
| 107.H | 0.388684  | -5.670169 | 2.401343  |
| 108.H | 0.648310  | 6.264744  | 2.792132  |
| 109.H | 1.912828  | -4.794016 | 2.606658  |
| 110.H | -2.402416 | 5.804291  | 2.843223  |
| 111.H | -1.886328 | 0.413235  | 2.850089  |
| 112.H | 1.614625  | 0.153529  | 3.142287  |
| 113.H | -2.502402 | 4.069786  | 3.184449  |
| 114.H | 5.357895  | 0.279676  | 3.435599  |
| 115.H | 4.735084  | -2.722144 | 3.314118  |
| 116.H | -1.843335 | -4.516963 | 3.263059  |
| 117.H | 1.626740  | -1.614290 | 3.336463  |
| 118.H | 0.469956  | -4.278248 | 3.496817  |
| 119.H | -1.868118 | 2.069061  | 3.400568  |
| 120.H | -2.151218 | -1.474998 | 3.577646  |
| 121.H | -4.135250 | -3.799362 | 3.938364  |
| 122.H | -0.653521 | -2.364824 | 3.884743  |
| 123.H | -1.377294 | 5.088230  | 4.096537  |
| 124.H | 2.229367  | 4.846764  | 4.081115  |
| 125.H | 2.024459  | 2.324183  | 3.918011  |
| 126.H | 2.697325  | -0.605891 | 4.328251  |
| 127.H | -2.086324 | -2.664728 | 4.889902  |
| 128.H | 0.701010  | 4.895647  | 4.980042  |

|        |           |           |           |
|--------|-----------|-----------|-----------|
| 129.H  | -0.035459 | 1.149366  | 4.691217  |
| 130.H  | -0.691817 | 2.680237  | 5.319003  |
| 131.H  | 2.105227  | 4.064216  | 5.668163  |
| 132.H  | 0.777571  | 1.990823  | 6.024791  |
| 133.As | 2.647480  | -0.545648 | -0.096874 |
| 134.N  | -1.102226 | 1.104793  | -1.864849 |
| 135.N  | -2.905928 | 0.852151  | 0.393836  |
| 136.N  | -1.622104 | -1.804662 | 0.389342  |
| 137.N  | -0.478464 | 1.639468  | 1.795006  |
| 138.Si | -0.929693 | 0.732808  | -3.595634 |
| 139.Si | 4.322454  | -1.112747 | -1.672956 |
| 140.Si | -1.415826 | -3.412066 | 1.129629  |
| 141.Si | 3.642314  | -0.882054 | 2.021211  |
| 142.Si | 0.417298  | 3.104515  | 2.277707  |
| 143.Th | -0.274729 | 0.097984  | 0.055993  |

Energy: -759.46662399 eV

**Table S12. Final Coordinates and Single Point Energy of 4ThSb After Geometry Optimisation**

|      |           |           |           |
|------|-----------|-----------|-----------|
| 1.C  | -0.311199 | -0.434612 | -6.566356 |
| 2.C  | 3.033805  | 0.572645  | -5.534638 |
| 3.C  | -2.693855 | 0.450098  | -4.903333 |
| 4.C  | -1.778312 | -2.486209 | -4.859488 |
| 5.C  | 1.290656  | 2.928932  | -4.626746 |
| 6.C  | 3.504927  | 1.787631  | -2.804422 |
| 7.C  | -3.225552 | 2.760808  | -2.062832 |
| 8.C  | -3.944356 | -3.403682 | -1.702215 |
| 9.C  | -0.417929 | 5.130860  | -1.488694 |
| 10.C | 4.661315  | -1.699369 | -1.180529 |
| 11.C | -0.499938 | -4.893009 | -1.094982 |
| 12.C | -2.897032 | -2.475103 | -1.053157 |
| 13.C | -3.456160 | -1.044826 | -0.961501 |
| 14.C | -0.252778 | 3.731203  | -0.859384 |
| 15.C | -3.332685 | 3.435016  | -0.683969 |
| 16.C | 3.383351  | -1.392294 | -0.376093 |
| 17.C | 1.166004  | 3.580007  | -0.280811 |
| 18.C | 2.558806  | -2.679480 | -0.196134 |
| 19.C | -4.569054 | 2.910593  | 0.073564  |
| 20.C | -1.421776 | -4.923461 | 0.138110  |
| 21.C | 6.348338  | 0.576112  | 1.014465  |
| 22.C | 4.877637  | 1.031326  | 0.898896  |
| 23.C | -0.710346 | -5.619822 | 1.317159  |
| 24.C | -2.649320 | 5.821518  | 1.520430  |
| 25.C | -4.306634 | -4.839999 | 1.793279  |
| 26.C | 4.677321  | 2.344518  | 1.681272  |
| 27.C | -1.856875 | 4.533085  | 1.832448  |
| 28.C | -3.518082 | -3.521369 | 1.949879  |
| 29.C | -4.503126 | -2.356125 | 2.170614  |
| 30.C | -2.291949 | 1.276886  | 2.094795  |
| 31.C | 5.170223  | -2.556540 | 2.378319  |
| 32.C | -0.518490 | 4.897151  | 2.506658  |
| 33.C | -0.455883 | -2.360015 | 2.525076  |
| 34.C | 4.060866  | -1.534423 | 2.714878  |
| 35.C | 1.754015  | 1.097885  | 2.719760  |
| 36.C | -1.424930 | 1.108817  | 3.340286  |
| 37.C | -0.945383 | -1.306625 | 3.514845  |

|      |           |           |           |
|------|-----------|-----------|-----------|
| 38.C | 0.889559  | 0.322912  | 3.710448  |
| 39.C | 4.408400  | -0.837658 | 4.048879  |
| 40.H | -1.033533 | -0.663627 | -7.367828 |
| 41.H | 0.029311  | 0.599692  | -6.713019 |
| 42.H | 0.552837  | -1.102266 | -6.688102 |
| 43.H | 2.355480  | 0.363696  | -6.372394 |
| 44.H | 3.799145  | 1.283836  | -5.890778 |
| 45.H | -3.317633 | 0.220613  | -5.784186 |
| 46.H | -2.475687 | -2.661504 | -5.695912 |
| 47.H | 3.539287  | -0.366329 | -5.265483 |
| 48.H | 0.504089  | 2.724795  | -5.368141 |
| 49.H | -0.936127 | -3.186450 | -4.961375 |
| 50.H | 2.029969  | 3.601702  | -5.093910 |
| 51.H | -2.403653 | 1.509517  | -4.958188 |
| 52.H | -3.316502 | 0.324356  | -4.006366 |
| 53.H | -2.305900 | -2.730225 | -3.926774 |
| 54.H | 0.822593  | 3.463553  | -3.786904 |
| 55.H | 4.148020  | 2.571296  | -3.238028 |
| 56.H | -4.258298 | -3.017449 | -2.685651 |
| 57.H | 4.139818  | 0.914582  | -2.593723 |
| 58.H | -4.189749 | 2.797952  | -2.597572 |
| 59.H | -2.475960 | 3.243740  | -2.705135 |
| 60.H | 0.346516  | 5.305606  | -2.263786 |
| 61.H | 4.397188  | -2.160478 | -2.146587 |
| 62.H | -2.938284 | 1.702949  | -1.976639 |
| 63.H | -1.017673 | -4.544189 | -1.999357 |
| 64.H | -1.400804 | 5.265156  | -1.962195 |
| 65.H | 3.113986  | 2.162343  | -1.849389 |
| 66.H | -3.562453 | -4.422579 | -1.856949 |
| 67.H | -3.727961 | -0.667796 | -1.959054 |
| 68.H | -2.022852 | -2.438947 | -1.732864 |
| 69.H | -0.348036 | 2.986625  | -1.674947 |
| 70.H | 5.244843  | -0.794120 | -1.397806 |
| 71.H | -0.103487 | -5.899474 | -1.312068 |
| 72.H | -4.850708 | -3.479225 | -1.081745 |
| 73.H | 2.310725  | -3.115644 | -1.175594 |
| 74.H | 1.920750  | 3.794388  | -1.052996 |
| 75.H | -3.484955 | 4.517574  | -0.852996 |
| 76.H | 0.361743  | -4.229600 | -0.936941 |
| 77.H | 2.783541  | -0.721643 | -1.030061 |
| 78.H | 5.322411  | -2.402053 | -0.651321 |
| 79.H | -0.301073 | 5.926894  | -0.736668 |
| 80.H | -5.488716 | 3.085946  | -0.509658 |
| 81.H | -2.751639 | -0.307595 | -0.538506 |
| 82.H | -4.359142 | -0.997248 | -0.337333 |
| 83.H | -2.299758 | -5.545643 | -0.121623 |
| 84.H | 4.692221  | 1.272801  | -0.165270 |
| 85.H | 1.385004  | 2.566963  | 0.097258  |
| 86.H | -4.498172 | 1.825834  | 0.244702  |
| 87.H | 6.563493  | -0.329706 | 0.430626  |
| 88.H | 3.107381  | -3.437196 | 0.382292  |
| 89.H | 1.600259  | -2.528549 | 0.332705  |
| 90.H | 1.349385  | 4.272527  | 0.551446  |
| 91.H | -2.160033 | 6.426786  | 0.741344  |
| 92.H | 7.026441  | 1.368468  | 0.653251  |

|        |           |           |           |
|--------|-----------|-----------|-----------|
| 93.H   | -4.911989 | -4.847935 | 0.873628  |
| 94.H   | -4.706318 | 3.394827  | 1.052550  |
| 95.H   | -0.425129 | -6.650203 | 1.046046  |
| 96.H   | -3.673220 | 5.610910  | 1.180358  |
| 97.H   | 5.401376  | 3.105150  | 1.342501  |
| 98.H   | -5.214165 | -2.271898 | 1.334688  |
| 99.H   | 4.950894  | -3.138325 | 1.472564  |
| 100.H  | 0.216464  | -5.093928 | 1.592755  |
| 101.H  | -3.651633 | -5.721995 | 1.764776  |
| 102.H  | 3.672017  | 2.762696  | 1.539818  |
| 103.H  | 0.085168  | 5.555331  | 1.863479  |
| 104.H  | 6.624666  | 0.369172  | 2.060375  |
| 105.H  | -1.339466 | -5.682675 | 2.218105  |
| 106.H  | -2.830767 | 0.330590  | 1.906355  |
| 107.H  | -2.725963 | 6.454740  | 2.421174  |
| 108.H  | 6.143491  | -2.065362 | 2.228425  |
| 109.H  | -3.998871 | -1.383860 | 2.268561  |
| 110.H  | -5.002922 | -4.975251 | 2.638773  |
| 111.H  | -3.079973 | 2.016289  | 2.307544  |
| 112.H  | -2.451708 | 3.980998  | 2.584680  |
| 113.H  | 4.841487  | 2.209359  | 2.762321  |
| 114.H  | 1.265076  | 2.064327  | 2.499955  |
| 115.H  | 0.096067  | 4.014793  | 2.739350  |
| 116.H  | 0.650044  | -2.383515 | 2.544616  |
| 117.H  | -2.928021 | -3.622512 | 2.881372  |
| 118.H  | -5.100552 | -2.513429 | 3.084893  |
| 119.H  | -0.768447 | -3.353453 | 2.884011  |
| 120.H  | 3.132085  | -2.116981 | 2.879190  |
| 121.H  | 5.293734  | -3.274703 | 3.207450  |
| 122.H  | -0.689632 | 5.440916  | 3.451368  |
| 123.H  | 2.700796  | 1.362140  | 3.214997  |
| 124.H  | -0.881997 | 2.047202  | 3.513624  |
| 125.H  | -2.042185 | -1.284472 | 3.481238  |
| 126.H  | 5.313915  | -0.218429 | 3.956911  |
| 127.H  | 1.385971  | -0.631436 | 3.930555  |
| 128.H  | -2.028423 | 0.894515  | 4.242874  |
| 129.H  | 3.604700  | -0.188691 | 4.422656  |
| 130.H  | -0.643360 | -1.537720 | 4.554317  |
| 131.H  | 4.610641  | -1.586737 | 4.833987  |
| 132.H  | 0.767541  | 0.867644  | 4.666524  |
| 133.N  | -1.449283 | 1.647700  | 0.928994  |
| 134.N  | -0.961125 | -2.054416 | 1.160687  |
| 135.N  | 1.956543  | 0.318239  | 1.472520  |
| 136.N  | -0.433981 | 0.026624  | 3.104942  |
| 137.Sb | 0.490377  | -0.345535 | -2.909530 |
| 138.Si | -1.169267 | -0.686674 | -4.887406 |
| 139.Si | 2.132451  | 1.326401  | -4.037635 |
| 140.Si | -1.699714 | 3.306066  | 0.329990  |
| 141.Si | -2.181644 | -3.204691 | 0.571659  |
| 142.Si | 3.583087  | -0.367128 | 1.234150  |
| 143.Th | -0.030911 | -0.084840 | 0.353761  |

Energy: -758.34376372 eV

## References

1. B. M. Gardner, G. Balázs, M. Scheer, F. Tuna, E. J. L. McInnes, J. McMaster, W. Lewis, A. J. Blake, S. T. Liddle, *Angew. Chem. Int. Ed.* **2014**, *53*, 4484.
2. B. M. Gardner, W. Lewis, A. J. Blake, S. T. Liddle, *Organometallics* **2015**, *34*, 2386.
3. E. P. Wildman, G. Balázs, A. J. Wooles, M. Scheer, S. T. Liddle, *Nat. Commun.* **2016**, *7*, 12884.
4. C. Marquardt, O. Hegen, M. Hautmann, G. Balázs, M. Bodensteiner, A. V. Virovets, A. Y. Timoshkin, M. Scheer, *Angew. Chem. Int. Ed.* **2015**, *54*, 13122.
5. U. Englisch, K. Hassler, K. Ruhlandt-Senge, F. Uhlig, *Inorg. Chem.* **1998**, *37*, 3532.
6. H. H. Karsch, F. Bienlein, T. Rupprich, F. Uhlig, E. Herrmann, M. Scheer, *Synth. Methods Organometallic and Inorg. Chem.*, Vol. 3, Thieme, **1996**, pp. 58-65.
7. C. Fonseca Guerra, J. G. Snijders, G. te Velde E. J. Baerends, *Theor. Chem. Acc.* **1998**, *99*, 391.
8. G. te Velde, F. M. Bickelhaupt, S. J. A. van Gisbergen, C. Fonseca Guerra, E. J. Baerends, J. G. Snijders T. Ziegler, *J. Comput. Chem.* **2001**, *22*, 931.
9. S. H. Vosko, L. Wilk, M. Nusair, *Can. J. Phys.* **1980**, *58*, 1200.
10. A. D. Becke, *Phys. Rev. A.* **1988**, *38*, 3098.
11. J. P. Perdew, *Phys. Rev. B.* **1986**, *33*, 8822.
12. S. Portmann, H. P. Luthi, *Chimia* **2000**, *54*, 766.
13. NBO 5.0: E. D. Glendening, J. K. Badenhoop, A. E. Reed, J. E. Carpenter, J. A. Bohmann, C. M. Morales, F. Weinhold, (Theoretical Chemistry Institute, University of Wisconsin, Madison, WI, 2001); <http://www.chem.wisc.edu/~nbo5>.
14. R. F. W. Bader, *Atoms in Molecules: A Quantum Theory*, Oxford University Press, New York, 1990.
15. R. F. W. Bader, *J. Phys. Chem. A.* **1998**, *102*, 7314.
16. <http://www.quimica.urv.es/XAIM>.
